# Supplementary material
Source: publisher figshare collection journal article supplement (https://acs.figshare.com/ndownloader/files/4676809)

**Syn Addition to 4a-Epoxy pyranosides: Synthesis of L-Idopyranosides**  
**Supporting Information**

|                                                                                           |      |
|-------------------------------------------------------------------------------------------|------|
| Table of Contents .....                                                                   | S-1  |
| General Methods and Experimental Procedures .....                                         | S-2  |
| Chemical Characterization of L-Idopyranosides <b>9a–9m, 10a–10f, 11e</b> .....            | S-3  |
| Synthesis and Characterization of L-Iduronic acid ( <b>12</b> ) .....                     | S-13 |
| Synthesis and Characterization of Neosamine B derivatives ( <b>13–15</b> ) .....          | S-14 |
| Products of Diphenethylzinc Additions ( <b>16–17</b> ) .....                              | S-16 |
| Synthesis and Characterization of Higher-Order L-Idopyranosides ( <b>18–23</b> ) .....    | S-17 |
| Chemical Shifts and Coupling Constants of Select C4 acetates (Table S1) .....             | S-22 |
| <sup>1</sup> H and <sup>13</sup> C NMR Spectra of L-Idopyranosides <b>9–23</b> .....      | S-23 |
| (including select C4 acetates and minor isomers)                                          |      |
| <sup>1</sup> H NOE Difference Spectra of Higher-Order L-Idopyranosides <b>20–23</b> ..... | S-99 |

**General Methods.** All starting materials and reagents were obtained from commercial sources and used as received unless otherwise noted. All solvents used were freshly distilled prior to use. Optical rotations were measured at room temperature with a Rudolph Research AUTOPOL® III polarimeter.  $^1\text{H}$  and  $^{13}\text{C}$  spectra were recorded on a Varian Unity Inova NMR spectrometer operating at 300 MHz and 75 MHz, respectively, or a Bruker DRX 400 operating at 400 MHz and 100 MHz, respectively, and referenced to the solvent used (7.27 and 77.00 ppm for  $\text{CDCl}_3$ , 7.16 and 128.00 ppm for  $\text{C}_6\text{D}_6$ , 3.31 and 49.15 ppm for  $\text{CD}_3\text{OD}$ ) unless otherwise stated. Mass spectra were acquired using either a Hewlett-Packard 5989B or a Finnigan 4000 mass spectrometer. Silica gel chromatography was performed with ICN SiliTech 32-63 D. Preparative TLC separation was performed with Silica G Prep TLC (Sorbent Tech, 500  $\mu\text{m}$ ).

**General procedure for  $\text{ZnBr}_2$ -mediated organozinc addition to 4 $\alpha$ -epoxy pyranoside (4-EP).** A solution of sublimed  $\text{ZnBr}_2$  (232 mg, 1.02 mmol) in dry THF (2 mL) was treated at  $-78^\circ\text{C}$  with an organolithium or Grignard reagent (0.294 mmol), then stirred at  $0^\circ\text{C}$  for 30 min before cooling again to  $-78^\circ\text{C}$ . A solution of 4-EP (**6**) (50 mg, 0.147 mmol) in dry  $\text{CH}_2\text{Cl}_2$  (1 mL) was cannulated dropwise to the reaction mixture, stirred for 15 min at  $-78^\circ\text{C}$ , then stirred to  $0^\circ\text{C}$  in an ice bath and slowly allowed to warm up to rt over 2 h. The reaction was quenched with saturated  $\text{NH}_4\text{Cl}$  solution (5 mL), extracted with  $\text{CH}_2\text{Cl}_2$  ( $3 \times 25$  mL), washed with brine (5 mL), dried over anhydrous  $\text{Na}_2\text{SO}_4$ , then concentrated under reduced pressure. Purification by silica gel chromatography yielded the corresponding L-idopyranoside in good yields (see Tables 1 and 2 in main text).

**General procedure for ozonolysis:** In the instance provided, a solution of **11e** (20 mg, 0.066 mmol) in a 1:1 mixture of MeOH and  $\text{CH}_2\text{Cl}_2$  (8 mL) was cooled to  $-78^\circ\text{C}$  and treated with a stream of electrically generated ozone at a flow rate of 2 L/min. The flow was stopped after 10 min and the reaction mixture was stirred at  $-78^\circ\text{C}$  for another 30 min, then treated with  $\text{Me}_2\text{S}$  and warmed to rt over 2 h. The solvent was removed under reduced pressure to afford the intermediate aldehyde as a pale yellow oil, which was used without further purification.

**General procedure for catalytic dihydroxylation:** In the instance provided, a solution of olefin **9m** (20 mg, 0.051 mmol) in a 1:8 mixture of water:acetone (4.5 mL) was treated at rt with *N*-methylmorpholine (13 mg, 0.11 mmol) and a 2.5% (w/v) solution of OsO<sub>4</sub> in *t*-BuOH (40  $\mu$ L, 5 mol%). The reaction mixture was stirred at rt for 12 h, quenched with a saturated Na<sub>2</sub>S<sub>2</sub>O<sub>3</sub> solution (3 mL) and stirred for 10 min, then extracted with EtOAc (3  $\times$  15 mL), washed with brine, dried over anhydrous Na<sub>2</sub>SO<sub>4</sub> and concentrated. Purification by preparative TLC yielded the diol as colorless oil (18 mg, 83%).

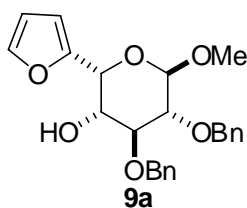

<sup>1</sup>H NMR (300 MHz, CDCl<sub>3</sub>):  $\delta$  7.43–7.29 (m, 11H), 6.56 (d, 1H, *J* = 3.6 Hz), 6.39 (dd, 1H, *J* = 1.8, 3.0 Hz), 5.23 (s, 1H), 4.86 (s, 1H), 4.70 (d, 1H, *J* = 12.3 Hz), 4.64 (d, 1H, *J* = 12.9 Hz), 3.94 (bs, 1H), 3.88 (t, 1H, *J* = 3.0 Hz), 3.59 (bs, 1H), 3.51 (s, 3H); <sup>13</sup>C NMR (75 MHz, CDCl<sub>3</sub>):  $\delta$  152.1, 142.1, 137.7, 136.9, 128.5, , 128.1, 127.9, 127.7, 110.3, 108.7, 100.4, 74.1, 74.0, 72.6, 72.0, 68.1, 63.9, 55.8; IR (thin film): 3467, 3064, 3034, 2920, 1452, 1259, 1101 cm<sup>-1</sup>; [ $\alpha$ ]<sub>D</sub><sup>20</sup> = –21.4 (*c* 0.8, CH<sub>2</sub>Cl<sub>2</sub>); ESI-MS: *m/z* calcd for C<sub>24</sub>H<sub>26</sub>O<sub>6</sub>Na [M+Na]<sup>+</sup> 433; found: 433.12.

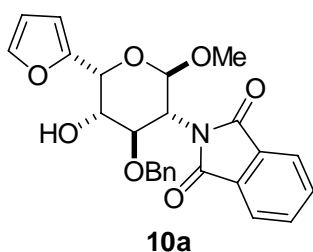

<sup>1</sup>H NMR (300 MHz, CDCl<sub>3</sub>):  $\delta$  7.79–7.70 (m, 4H), 7.56 (s, 1H), 7.11–7.01 (m, 5H), 6.66 (d, 1H, *J* = 3.6 Hz), 6.49 (bs, 1H), 5.30 (d, 1H, *J* = 5.7 Hz), 5.20 (d, 1H, *J* = 8.4 Hz), 4.79 (d, 1H, *J* = 11.7 Hz), 4.71 (dd, 1H, *J* = 9.0, 9.9 Hz), 4.58 (d, 1H, *J* = 12.3 Hz), 4.31–4.20 (m, 2H), 3.30 (s, 3H), 2.4 (bs, 1H); <sup>13</sup>C NMR (75 MHz, CDCl<sub>3</sub>):  $\delta$  168.0, 149.9, 14.0, 137.9, 133.9, 131.7, 128.3, 127.8, 127.6, 123.4, 111.1, 110.6, 96.5, 74.11, 73.1, 69.7, 56.3, 55.0; IR (thin film): 3467, 3059, 3028, 2925, 2853, 1775, 1711, 1468, 1390, 1091, 1044,

1013, 910;  $[\alpha]_D^{20} = +11.7$  ( $c$  1.67,  $\text{CHCl}_3$ ); ESI-MS:  $m/z$  calcd for  $\text{C}_{25}\text{H}_{23}\text{NO}_7\text{Na}$   $[\text{M}+\text{Na}]^+$  472; found: 472.08.

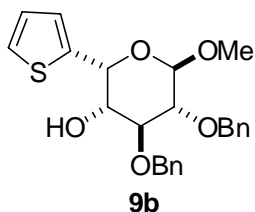

$^1\text{H}$  NMR (300 MHz,  $\text{CDCl}_3$ ):  $\delta$  7.40–7.20 (m, 11H), 7.05 (d, 1H,  $J = 3.3$  Hz), 6.99 (dd, 1H,  $J = 3.6, 4.2$  Hz), 5.26 (s, 1H), 4.79 (s, 1H), 4.60–4.42 (m, 4H), 3.80–3.71 (m, 2H), 3.44 (s, 1H), 3.39 (s, 3H), 3.37 (d, 1H,  $J = 11.7$  Hz);  $^{13}\text{C}$  NMR (75 MHz,  $\text{CDCl}_3$ ):  $\delta$  141.0, 137.7, 136.7, 128.5, 128.2, 127.9, 127.8, 126.1, 125.8, 125.7, 100.5, 73.7, 73.3, 72.4, 71.9, 69.2, 65.5, 55.8; IR (thin film): 3510, 3065, 3028, 2920, 1493, 1452, 1204, 1192, 1096, 1026  $\text{cm}^{-1}$ ;  $[\alpha]_D^{20} = -51.4$  ( $c$  1.33  $\text{CHCl}_3$ ); ESI-MS:  $m/z$  calcd for  $\text{C}_{24}\text{H}_{26}\text{O}_5\text{SNa}$   $[\text{M}+\text{Na}]^+$  449; found: 448.95.

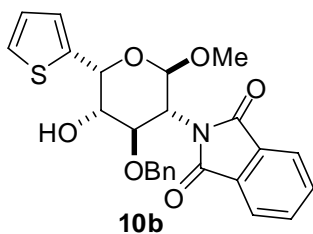

$^1\text{H}$  NMR (300 MHz,  $\text{CDCl}_3$ ):  $\delta$  7.70–7.58 (m, 4H), 7.28 (d, 1H,  $J = 5.1$  Hz), 7.20 (d, 1H,  $J = 3.6$  Hz), 7.08–6.90 (m, 6H), 5.42 (d, 1H,  $J = 5.4$  Hz), 5.19 (d, 1H,  $J = 8.1$  Hz), 4.70 (d, 1H,  $J = 12.3$  Hz), 4.51 (d, 1H,  $J = 11.7$  Hz), 4.42 (dd, 1H,  $J = 3.6, 10.5$  Hz), 4.34 (dd, 1H,  $J = 8.1, 10.5$  Hz), 4.17 (dd, 1H,  $J = 5.1, 5.4$  Hz), 3.24 (s, 3H);  $^{13}\text{C}$  NMR (75 MHz,  $\text{CDCl}_3$ ):  $\delta$  168.0, 138.9, 137.8, 134.0, 131.6, 128.2, 127.8, 127.6, 126.9, 126.6, 126.0, 123.4, 96.9, 74.2, 73.5, 70.9, 56.0, 54.3; IR (thin film): 3467, 3064, 3023, 2930, 1772, 1713, 1468, 1452, 1388, 1093, 1070, 1037  $\text{cm}^{-1}$ ;  $[\alpha]_D^{20} = +27.2$  ( $c$  1.33  $\text{CHCl}_3$ ); ESI-MS:  $m/z$  calcd for  $\text{C}_{25}\text{H}_{23}\text{NO}_6\text{SNa}$   $[\text{M}+\text{Na}]^+$  488; found: 487.98.

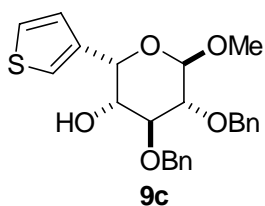

$^1\text{H}$  NMR (300 MHz,  $\text{CDCl}_3$ ):  $\delta$  7.30–7.10 (m, 12H), 7.04 (d, 1H,  $J$  = 3.6 Hz), 5.13 (bs, 1H), 4.75 (bs, 1H), 4.59 (d, 1H,  $J$  = 12.3 Hz), 4.46 (d, 1H,  $J$  = 12.9 Hz), 4.44 (bs, 2H), 3.75–3.68 (m, 2H), 3.47 (m, 1H), 3.43 (s, 3H), 3.12 (d, 1H,  $J$  = 7.5 Hz);  $^{13}\text{C}$  NMR (75 MHz,  $\text{CDCl}_3$ ):  $\delta$  139.6, 137.8, 128.5, 128.1, 127.9, 126.8, 125.3, 122.4, 100.4, 74.0, 73.6, 72.5, 72.0, 69.2, 65.7, 55.8; IR (thin film): 3519, 3059, 3018, 2920, 1493, 1452, 1192, 1145, 1099, 1026  $\text{cm}^{-1}$ ;  $[\alpha]_D^{20}$  =  $-14.7$  ( $c$  0.67  $\text{CHCl}_3$ ); ESI-MS:  $m/z$  calcd for  $\text{C}_{24}\text{H}_{26}\text{O}_5\text{SNa}$   $[\text{M}+\text{Na}]^+$  449; found: 448.94.

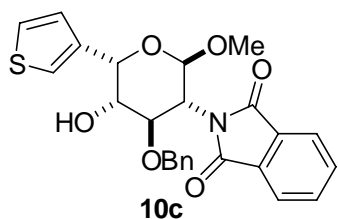

$^1\text{H}$  NMR (300 MHz,  $\text{CDCl}_3$ ):  $\delta$  7.81–7.70 (m, 5H), 7.53 (m, 1H), 7.42 (dd, 1H,  $J$  = 2.7, 3.0 Hz), 7.23 (dd, 1H,  $J$  = 1.2, 5.4 Hz), 7.12–7.05 (m, 5H), 5.40 (d, 1H,  $J$  = 4.2 Hz), 5.22 (d, 1H,  $J$  = 6.9 Hz), 4.78 (d, 1H,  $J$  = 12.3 Hz), 4.59 (d, 1H,  $J$  = 12.3 Hz), 4.44 (m, 2H), 4.21 (m, 1H), 3.37 (s, 3H), 2.38 (d, 1H,  $J$  = 5.1 Hz);  $^{13}\text{C}$  NMR (75 MHz,  $\text{CDCl}_3$ ):  $\delta$  168.0, 137.8, 137.1, 134.0, 131.6, 128.2, 127.7, 127.5, 126.7, 126.2, 123.4, 123.2, 97.2, 77.2, 74.6, 73.1, 70.9, 55.8, 54.1; IR (thin film): 3472, 3059, 3023, 2925, 1775, 1713, 1468, 1450, 1390, 1067, 1041, 972  $\text{cm}^{-1}$ ;  $[\alpha]_D^{20}$  =  $+33.9$  ( $c$  1.33  $\text{CHCl}_3$ ); ESI-MS:  $m/z$  calcd for  $\text{C}_{25}\text{H}_{23}\text{NO}_6\text{SNa}$   $[\text{M}+\text{Na}]^+$  488; found: 487.98.

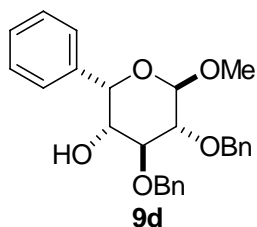

$^1\text{H}$  NMR (300 MHz,  $\text{C}_6\text{D}_6$ ):  $\delta$  7.57 (bs, 1H), 7.54 (bs, 1H), 7.31–7.07 (m, 13H), 5.45 (bs, 1H), 4.95 (bs, 1H), 4.48 (d, 1H,  $J = 12.3$  Hz), 4.37 (d, 1H,  $J = 12.3$  Hz), 4.30 (d, 1H,  $J = 11.7$  Hz), 4.24 (d, 1H,  $J = 11.7$  Hz), 4.01–3.93 (m, 2H), 3.64 (m, 1H), 3.35 (d, 1H,  $J = 11.1$  Hz), 3.15 (s, 3H);  $^{13}\text{C}$  NMR (75 MHz,  $\text{C}_6\text{D}_6$ ):  $\delta$  139.8, 138.8, 137.7, 128.7, 128.6, 128.2, 128.1, 127.4, 101.0, 75.4, 74.0, 72.4, 71.9, 70.8, 69.2, 55.0; IR (thin film): 3525, 3059, 3023, 2904, 1599, 1496, 1452, 1204, 1194, 1142, 1098, 1023  $\text{cm}^{-1}$ ;  $[\alpha]_D^{20} = -52.8$  (*c* 1.67  $\text{CHCl}_3$ ); ESI-MS  $m/z$  calcd for  $\text{C}_{26}\text{H}_{28}\text{O}_5\text{Na}$   $[\text{M}+\text{Na}]^+$  443; found: 443.09.

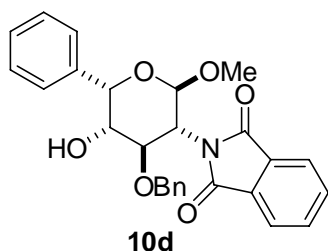

$^1\text{H}$  NMR (300 MHz,  $\text{C}_6\text{D}_6$ ):  $\delta$  7.58–7.44 (m, 4H), 7.38–7.20 (m, 5H), 7.09–6.92 (m, 5H), 5.79 (d, 1H,  $J = 6.6$  Hz), 5.35 (d, 1H,  $J = 3.3$  Hz), 5.17 (dd, 1H,  $J = 6.6, 6.9$  Hz), 4.94 (d, 1H,  $J = 11.7$  Hz), 4.84 (dd, 1H,  $J = 4.5, 4.8$  Hz), 4.73 (d, 1H,  $J = 12.3$  Hz), 4.07 (dd, 1H,  $J = 3.3, 4.8$  Hz), 3.21 (s, 3H), 1.89 (d, 1H,  $J = 4.2$  Hz);  $^{13}\text{C}$  NMR (75 MHz,  $\text{C}_6\text{D}_6$ ):  $\delta$  167.9, 138.5, 136.7, 133.3, 131.8, 128.2, 127.5, 127.1, 126.9, 122.9, 98.7, 78.4, 75.8, 73.0, 72.3, 54.7, 53.6; IR (thin film): 3473, 3059, 3028, 2930, 1772, 1713, 1496, 1467, 1452, 1388, 1119, 1070, 1039  $\text{cm}^{-1}$ ;  $[\alpha]_D^{20} = +14.7$  (*c* 1.67  $\text{CHCl}_3$ ); ESI-MS  $m/z$  calcd for  $\text{C}_{27}\text{H}_{25}\text{NO}_6\text{Na}$   $[\text{M}+\text{Na}]^+$  482; found: 482.04.

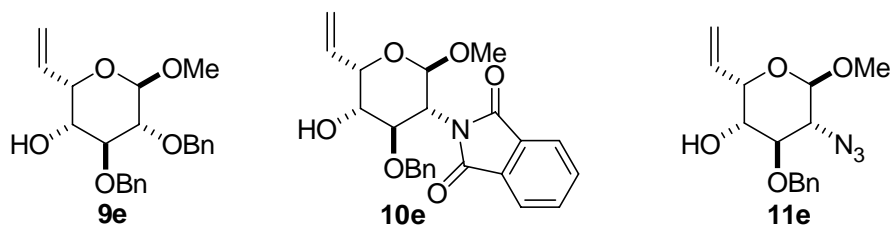

Compound **9e**:

$^1\text{H}$  NMR (300 MHz,  $\text{C}_6\text{D}_6$ ):  $\delta$  7.26–7.05 (m, 10H), 6.28–6.17 (m, 1H), 5.47 (d, 1H,  $J$  = 11.1 Hz), 5.21 (d, 1H,  $J$  = 10.5 Hz), 4.83–4.78 (m, 2H), 4.46 (d, 1H,  $J$  = 12.3 Hz), 4.34 (d, 1H,  $J$  = 12.3 Hz), 4.26 (bs, 2H), 3.82 (m, 2H), 3.55 (bs, 1H), 3.25–3.20 (m, 4H);  $^{13}\text{C}$  NMR (75 MHz,  $\text{C}_6\text{D}_6$ ):  $\delta$  138.9, 137.9, 136.1, 128.7, 128.6, 127.9, 127.8, 116.7, 100.4, 100.3, 75.6, 74.7, 72.6, 72.1, 70.1, 69.3, 55.0; IR (thin film): 3519, 3059, 3023, 2910, 1493, 1452, 1142, 1099, 1059, 1026  $\text{cm}^{-1}$ ;  $[\alpha]_{\text{D}}^{20}$  =  $-42.0$  ( $c$  0.67  $\text{CHCl}_3$ ); ESI-MS:  $m/z$  calcd for  $\text{C}_{22}\text{H}_{26}\text{O}_5\text{Na}$   $[\text{M}+\text{Na}]^+$  393; found: 393.09.

Compound **10e**:

$^1\text{H}$  NMR (300 MHz,  $\text{CDCl}_3$ ):  $\delta$  7.78–7.68 (m, 4H), 7.08–6.98 (m, 5H), 6.26–6.14 (m, 1H), 5.60–5.48 (m, 2H), 5.32 (d, 1H,  $J$  = 7.2 Hz), 4.76 (d, 1H,  $J$  = 11.7 Hz), 4.69 (dd, 1H,  $J$  = 5.1, 6.0 Hz), 4.53 (d, 1H,  $J$  = 12.3 Hz), 4.32–4.22 (m, 2H), 4.06–4.00 (m, 1H), 3.35 (s, 3H), 2.64 (d, 1H,  $J$  = 5.1 Hz);  $^{13}\text{C}$  NMR (75 MHz,  $\text{CDCl}_3$ ):  $\delta$  168.0, 137.9, 133.9, 131.9, 131.5, 128.1, 127.6, 127.4, 123.3, 120.1, 96.0, 77.1, 73.8, 73.6, 55.9, 54.9; IR (thin film): 3467, 2935, 1775, 1711, 1467, 1452, 1388, 1199, 1088  $\text{cm}^{-1}$ ;  $[\alpha]_{\text{D}}^{20}$  =  $-8.8$  ( $c$  0.67  $\text{CHCl}_3$ ); ESI-MS:  $m/z$  calcd for  $\text{C}_{23}\text{H}_{23}\text{NO}_6\text{Na}$   $[\text{M}+\text{Na}]^+$  432; found: 432.08.

Compound **11e**:

$^1\text{H}$  NMR (300 MHz,  $\text{CDCl}_3$ ):  $\delta$  7.40 (m, 10H), 6.07–5.88 (m, 1H), 5.53–5.34 (m, 2H), 4.85 (d, 1H,  $J$  = 12.3 Hz), 4.74 (d, 1H,  $J$  = 12.3 Hz), 4.62 (m, 2H), 3.76 (m, 1H), 3.58 (m, 2H), 3.43 (s, 3H), 2.40 (d, 1H,  $J$  = 4.8 Hz);  $^{13}\text{C}$  NMR (75 MHz,  $\text{CDCl}_3$ ):  $\delta$  137.5, 132.6, 128.5, 128.0, 127.9, 118.6, 99.5, 78.0, 77.4, 70.4, 62.0, 56.0; IR (thin film): 3462, 3053, 3023, 2914, 2847, 2109, 1635, 1450, 1357, 1259, 1091, 1052  $\text{cm}^{-1}$ ;  $[\alpha]_{\text{D}}^{20}$  =  $-101.8$  ( $c$  1.0  $\text{CHCl}_3$ ); ESI-MS:  $m/z$  calcd for  $\text{C}_{15}\text{H}_{20}\text{N}_3\text{O}_4$   $[\text{M}+\text{H}]^+$  306; found: 306.21.

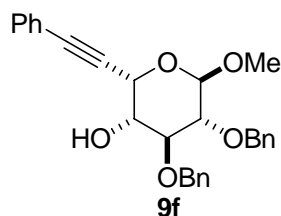

$^1\text{H}$  NMR (300 MHz,  $\text{C}_6\text{D}_6$ ):  $\delta$  7.43 (m, 2H), 7.32 (m, 3H), 7.20 (m, 7H), 6.93 (m, 3H), 5.12 (m, 2H), 4.97 (d, 1H,  $J = 12.0$  Hz), 4.92 (d, 1H,  $J = 11.7$  Hz), 4.77 (d, 1H,  $J = 11.7$  Hz), 4.70 (d, 1H,  $J = 12.0$  Hz), 4.27 (dd, 1H,  $J = 5.7, 9.3$  Hz);  $^{13}\text{C}$  NMR (75 MHz,  $\text{C}_6\text{D}_6$ ):  $\delta$  138.9, 138.6, 132.0, 128.5, 128.3, 127.4, 122.6, 101.8, 88.7, 84.8, 80.1, 79.8, 74.2, 74.1, 71.0, 65.2, 56.2; IR (thin film): 3452, 3065, 3028, 2910, 2847, 1597, 1491, 1449, 1351, 1212, 1191, 1098, 1053 1026, 962  $\text{cm}^{-1}$ ;  $[\alpha]_{\text{D}}^{20} = -45.2$  ( $c$  1.0  $\text{CHCl}_3$ ); ESI-MS:  $m/z$  calcd for  $\text{C}_{28}\text{H}_{28}\text{O}_5\text{Na}$   $[\text{M}+\text{Na}]^+$  467; found: 466.94.

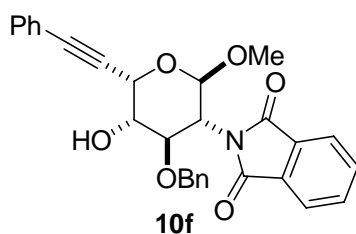

$^1\text{H}$  NMR (300 MHz,  $\text{C}_6\text{D}_6$ ):  $\delta$  7.83 (dd, 2H,  $J = 1.8, 8.1$  Hz), 7.41 (dd, 2H,  $J = 5.1, 6.0$  Hz), 7.08–6.78 (m, 10H), 6.15 (d, 1H,  $J = 8.7$  Hz), 4.97–4.90 (m, 2H), 4.80 (d, 1H,  $J = 12.3$  Hz), 4.75 (dd, 1H,  $J = 8.7, 10.5$  Hz), 4.56 (d, 1H,  $J = 12.3$  Hz), 3.88 (m, 1H), 3.23 (s, 3H), 2.09 (m, 1H);  $^{13}\text{C}$  NMR (75 MHz,  $\text{C}_6\text{D}_6$ ):  $\delta$  167.9, 138.6, 133.2, 132.3, 132.0, 128.7, 128.4, 127.1, 122.9, 122.6, 96.9, 90.5, 83.8, 76.8, 74.1, 73.4, 67.1, 56.0, 55.8; IR (thin film): 3473, 3065, 3028, 2935, 1775, 1711, 1497, 1388, 1091, 1044, 972  $\text{cm}^{-1}$ ;  $[\alpha]_{\text{D}}^{20} = +23.2$  ( $c$  2.0  $\text{CHCl}_3$ ); ESI-MS:  $m/z$  calcd for  $\text{C}_{29}\text{H}_{25}\text{NO}_6\text{Na}$   $[\text{M}+\text{Na}]^+$  506; found: 505.96.



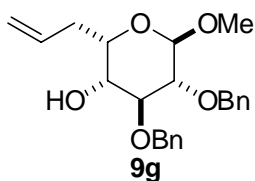

$^1\text{H}$  NMR (300 MHz,  $\text{CDCl}_3$ ):  $\delta$  7.34–7.16 (m, 10H), 5.82 (m, 1H), 5.07–4.96 (m, 2H), 4.89 (dd, 2H,  $J = 11.1, 12.0$  Hz), 4.62 (dd, 2H,  $J = 11.7, 12.3$  Hz), 4.20 (m, 1H), 3.47 (s, 3H), 3.32–3.12 (m, 4H), 2.50 (m, 1H), 2.18 (m, 1H), 2.06 (bs, 1H);  $^{13}\text{C}$  NMR (75 MHz,  $\text{CDCl}_3$ ):  $\delta$  138.5, 138.4, 134.1, 128.6, 128.4, 128.1, 128.0, 127.7, 117.2, 104.7, 83.9, 82.1, 75.2, 74.5, 74.3, 73.0, 56.9, 35.8; IR (thin film): 3354, 3065, 3023, 2905, 2848, 1641, 1493, 1449, 1390, 1359, 1316, 1269 1210, 1108, 1088, 1073, 1049, 995, 980  $\text{cm}^{-1}$ ;  $[\alpha]_D^{20} = -54.7$  ( $c$  0.53  $\text{CHCl}_3$ ); ESI-MS:  $m/z$  calcd for  $\text{C}_{23}\text{H}_{28}\text{O}_5\text{Na}$   $[\text{M}+\text{Na}]^+$  407; found: 407.01.

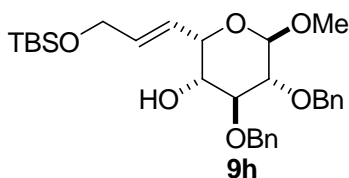

$^1\text{H}$  NMR (300 MHz,  $\text{CDCl}_3$ ):  $\delta$  7.48–7.24 (m, 10H), 6.05–5.91 (m, 2H), 4.86 (bs, 1H), 4.73–4.61 (m, 5H), 4.30–4.29 (m, 2H), 3.82 (m, 1H), 3.68 (m, 1H), 3.59 (m, 1H), 3.50 (s, 3H), 3.13 (d, 1H,  $J = 10.8$  Hz), 0.91 (s, 9H), 0.08 (s, 6H);  $^{13}\text{C}$  NMR (75 MHz,  $\text{CDCl}_3$ ):  $\delta$  137.8, 137.0, 132.8, 128.5, 128.4, 128.0, 127.9, 127.7, 126.6, 100.0, 74.0, 73.7, 72.4, 72.0, 69.1, 67.6, 63.4, 55.6, 25.9, 18.4,  $-5.20$ ; IR (thin film): 3364, 3064, 3034, 2925, 2858, 1493, 1455, 1388, 1359, 1315, 1253, 1194, 1096, 1065, 967  $\text{cm}^{-1}$ ;  $[\alpha]_D^{20} = -57.5$  ( $c$  0.80  $\text{CHCl}_3$ ); ESI-MS:  $m/z$  calcd for  $\text{C}_{29}\text{H}_{42}\text{O}_6\text{SiNa}$   $[\text{M}+\text{Na}]^+$  537; found: 537.17.

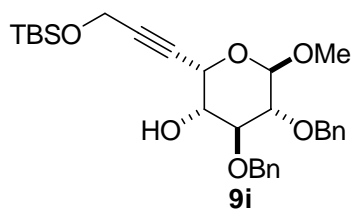

$^1\text{H}$  NMR (300 MHz,  $\text{CDCl}_3$ ):  $\delta$  7.39–7.26 (m, 10H), 4.90 (m, 1H), 4.85–4.78 (m, 3H), 4.70 (dd, 2H,  $J = 11.4, 11.7$  Hz), 4.41 (d, 2H,  $J = 1.8$  Hz), 3.76 (m, 2H), 3.53 (s, 3H), 3.44 (m, 1H), 2.58 (m, 1H), 0.90 (s, 9H), 0.12 (s, 6H);  $^{13}\text{C}$  NMR (75 MHz,  $\text{CDCl}_3$ ):  $\delta$  138.1, 137.9, 128.5, 128.4, 128.0, 127.9, 101.3, 87.4, 79.4, 78.9, 74.3, 73.9, 70.2, 63.7, 56.8, 51.7, 25.8, 18.3,  $-5.1$ ; IR (thin film): 3411, 3059, 3023, 2915, 1496, 1452, 1357, 1272, 1094, 1055, 1026  $\text{cm}^{-1}$ ;  $[\alpha]_D^{20} = -44.4$  ( $c$  1.0  $\text{CHCl}_3$ ); ESI-MS:  $m/z$  calcd for  $\text{C}_{29}\text{H}_{40}\text{O}_6\text{SiNa}$   $[\text{M}+\text{Na}]^+$  535; found: 534.91.

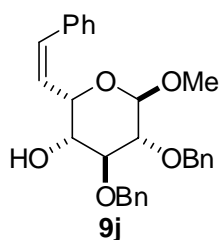

$^1\text{H}$  NMR (300 MHz,  $\text{CDCl}_3$ ):  $\delta$  7.36–7.26 (m, 15H), 6.75 (d, 1H,  $J = 12.0$  Hz), 6.03 (dd, 1H,  $J = 9.0, 12.0$  Hz), 5.20 (d, 1H,  $J = 9.0$  Hz), 4.76 (d, 1H,  $J = 1.8$  Hz), 4.70–4.57 (m, 4H), 3.81–3.77 (m, 2H), 3.54 (m, 1H), 3.33 (s, 3H);  $^{13}\text{C}$  NMR (75 MHz,  $\text{CDCl}_3$ ):  $\delta$  138.0, 137.1, 136.5, 133.1, 128.8, 128.5, 128.4, 128.3, 128.1, 127.9, 127.7, 127.5, 127.3, 100.2, 75.0, 74.8, 72.8, 72.2, 69.3, 64.7, 55.9; IR (thin film): 3514, 3059, 3028, 2920, 1493, 1450, 1393, 1352, 1194, 1142, 1096, 1052, 1026  $\text{cm}^{-1}$ ;  $[\alpha]_D^{20} = -5.2$  ( $c$  0.53  $\text{CHCl}_3$ ); ESI-MS:  $m/z$  calcd for  $\text{C}_{28}\text{H}_{30}\text{O}_5\text{Na}$   $[\text{M}+\text{Na}]^+$  469; found: 469.11.

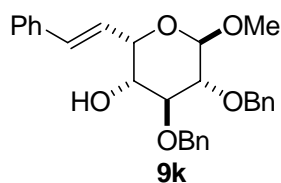

$^1\text{H}$  NMR (300 MHz,  $\text{CDCl}_3$ ):  $\delta$  7.44–7.21 (m, 15H), 6.76 (d, 1H,  $J = 15.9$  Hz), 6.46 (dd, 1H,  $J = 6.6, 15.9$  Hz), 4.85 (bs, 1H), 4.75 (bs, 1H), 4.73 (bs, 1H), 4.69 (d, 1H,  $J = 12.3$  Hz), 4.61 (d, 1H,  $J = 12.3$  Hz), 4.56 (bs, 2H), 3.81 (m, 1H), 3.72 (m, 1H), 3.56 (m, 2H), 3.47 (s, 3H), 3.20 (d, 1H,  $J = 10.5$  Hz);  $^{13}\text{C}$  NMR (75 MHz,  $\text{CDCl}_3$ ):  $\delta$  137.8, 136.9, 136.7, 132.6, 128.5, 128.1, 127.9, 127.8, 127.6, 126.6, 126.1, 100.1, 74.0, 73.6, 72.5, 72.0, 69.3, 68.3, 55.7; IR (thin film): 3504, 3054, 3023, 2915, 1496, 1450, 1362, 1315, 1269, 1194, 1145, 1096, 1026,  $967\text{ cm}^{-1}$ ;  $[\alpha]_D^{20} = -5.5$  ( $c$  0.8  $\text{CHCl}_3$ ); ESI-MS:  $m/z$  calcd for  $\text{C}_{28}\text{H}_{30}\text{O}_5\text{Na}$   $[\text{M}+\text{Na}]^+$  469; found: 469.11.

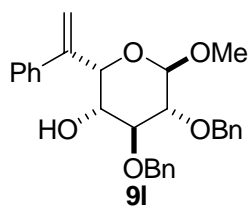

$^1\text{H}$  NMR (300 MHz,  $\text{CDCl}_3$ ):  $\delta$  7.42–7.22 (m, 15H), 5.61 (t, 1H,  $J = 1.8$  Hz), 5.49 (bs, 1H), 4.92 (bs, 1H), 4.62–4.50 (m, 4H), 3.80 (m, 1H), 3.65 (m, 1H), 3.58 (m, 1H), 3.47 (s, 3H), 3.01 (d, 1H,  $J = 11.1$  Hz);  $^{13}\text{C}$  NMR (75 MHz,  $\text{CDCl}_3$ ):  $\delta$  145.3, 139.5, 137.8, 137.0, 128.5, 128.4, 128.1, 127.9, 127.8, 127.7, 127.6, 126.9, 114.1, 100.9, 74.1, 73.9, 72.4, 71.9, 67.1, 66.5, 55.8; IR (thin film): 3467, 3064, 3028, 2920, 1497, 1450, 1393, 1352, 1194, 1142, 1093, 1052,  $1026\text{ cm}^{-1}$ ;  $[\alpha]_D^{20} = -72$  ( $c$  1.0  $\text{CHCl}_3$ ); ESI-MS:  $m/z$  calcd for  $\text{C}_{28}\text{H}_{30}\text{O}_5\text{Na}$   $[\text{M}+\text{Na}]^+$  469; found: 469.07.

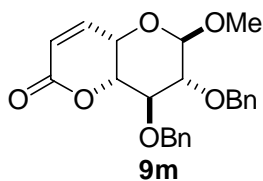

A solution of **9i** (51 mg, 0.1 mmol) in hexanes (6 mL) was treated with Lindlar catalyst (14 mg) and quinoline (13 mg) at rt and stirred for 2h, then exposed to a positive hydrogen atmosphere for 3h at rt with stirring. The reaction mixture was filtered, washed with 1 M HCl, saturated NaHCO<sub>3</sub>, and brine, dried over anhydrous Na<sub>2</sub>SO<sub>4</sub>, and concentrated to afford *cis*-alkene **18** as light yellow oil in quantitative yield. Alkene **18** was dissolved in THF (2 mL) and treated with TBAF in THF (1 M, 0.12 mL) at room temperature for 5 min. The reaction mixture was then concentrated and the resulting oil was dissolved in EtOAc, washed with brine, dried over anhydrous Na<sub>2</sub>SO<sub>4</sub>, filtered and concentrated to a yellow oil. The crude allylic alcohol was dissolved in CH<sub>2</sub>Cl<sub>2</sub> (3 mL), followed by addition of *bis*-acetoxyiodobenzene (96 mg, 0.3 mmol) and 2,2,6,6-tetramethylpiperidine-*N*-oxide (3 mg, 20 mol%) at room temperature. After stirring for 3 h, the reaction mixture was quenched with a saturated solution of Na<sub>2</sub>S<sub>2</sub>O<sub>3</sub> and extracted with CH<sub>2</sub>Cl<sub>2</sub> (3 × 15 mL). The combined organic extracts were washed with saturated NaHCO<sub>3</sub>, NH<sub>4</sub>Cl, and brine, dried over anhydrous Na<sub>2</sub>SO<sub>4</sub>, then filtered and concentrated. The residue was purified by silica gel chromatography (16.7% EtOAc in hexanes) to afford unsaturated lactone **9m** as a white solid (37 mg, 93% over three steps).

<sup>1</sup>H NMR (300 MHz, CDCl<sub>3</sub>): δ 7.40–7.28 (m, 10H), 6.83 (dd 1H, J = 4.8, 9.9 Hz), 6.23 (d, 1H, J = 9.9 Hz), 4.85–4.66 (m, 5H), 4.59–4.52 (m, 2H), 3.96 (dd, 1H, J = 4.5, 8.1 Hz), 3.57 (dd, 1H, J = 4.8, 8.1 Hz), 3.48 (s, 3H); <sup>13</sup>C NMR (75 MHz, CDCl<sub>3</sub>): δ 161.5, 140.8, 137.8, 137.6, 128.4, 128.3, 128.0, 127.8, 127.8, 124.4, 102.7, 79.0, 78.1, 77.8, 73.7, 59.2, 56.0; IR (thin film): 3467, 3025, 2924, 1731, 1606, 1493, 1452, 1401, 1256, 1105, 1071, 1046 cm<sup>-1</sup>; [α]<sub>D</sub><sup>20</sup> = −45.0 (c 0.67 CHCl<sub>3</sub>); ESI-MS: *m/z* calcd for C<sub>23</sub>H<sub>24</sub>O<sub>6</sub>Na [M+Na]<sup>+</sup> 419; found: 419.02.

Methyl 2,3-*O*-dibenzyl- $\alpha$ -L-iduronic acid (**12**)

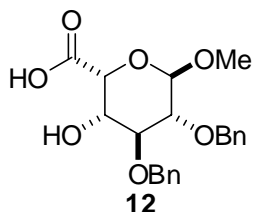

A solution of **9a** (80 mg, 0.195 mmol) in a 1:1 mixture of MeOH and CH<sub>2</sub>Cl<sub>2</sub> (10 mL) was cooled to  $-78\text{ }^{\circ}\text{C}$  and treated with a stream of electrically generated ozone at a flow rate of 2 L/min. The flow was stopped after 10 min and the reaction mixture was stirred at  $-78\text{ }^{\circ}\text{C}$  for another 30 min, then treated with Me<sub>2</sub>S and warmed to rt over 2 h. The mixture was concentrated and purified by silica gel chromatography (20% MeOH in CHCl<sub>3</sub>) to yield L-iduronic acid **12** as a white solid (55 mg, 73%). <sup>1</sup>H NMR (300 MHz, CD<sub>3</sub>OD):  $\delta$  7.30 (m, 10H), 5.02 (bs, 1H), 4.64 (d, 1H,  $J = 11.7\text{ Hz}$ ), 4.60 (bs, 2H), 4.57 (d, 1H,  $J = 11.7\text{ Hz}$ ), 4.51 (bs, 1H), 4.04 (bs, 1H), 3.71 (t, 1H,  $J = 4.2\text{ Hz}$ ), 3.48 (m, 1H), 3.42 (s, 3H); <sup>13</sup>C NMR (75 MHz, CD<sub>3</sub>OD):  $\delta$  178.0, 140.4, 139.9, 130.3, 130.2, 129.8, 129.6, 103.1, 78.3, 77.3, 74.8, 74.3, 72.3, 71.3, 57.2; IR (thin film): 3416, 3059, 3028, 2920, 1721, 1605, 1496, 1452, 1148, 1106, 1026, 949 cm<sup>-1</sup>;  $[\alpha]_{\text{D}}^{20} = -4.3$  ( $c$  1.0 CHCl<sub>3</sub>); ESI-MS:  $m/z$  calcd for C<sub>21</sub>H<sub>24</sub>O<sub>7</sub>Na [M+Na]<sup>+</sup> 411; found: 410.89.

Methyl 6-(*N*-benzyl)amino-2-azido-3-*O*-benzyl-2,6-dideoxy- $\alpha$ -L-idopyranoside (**13**)

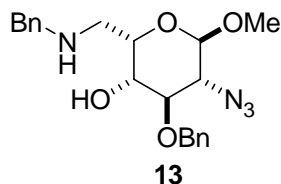

Ozonolysis of C5 vinyl adduct **11e** (20 mg, 0.066 mmol) produced the corresponding aldehyde, which was dissolved in 1,2-dichloroethane (2 mL), treated with benzylamine (6.5  $\mu$ L, 0.079 mmol), and stirred at rt for 3 h. The reaction mixture was then treated with a solution of NaCNBH<sub>3</sub> (41 mg, 0.66 mmol) in anhydrous MeOH (2 mL). The mixture was stirred for overnight at rt, then concentrated and redispersed in brine (5 mL), extracted with EtOAc (3  $\times$  15 mL), dried over Na<sub>2</sub>SO<sub>4</sub>, and concentrated to a yellow oil. Purification with silica gel chromatography (1% MeOH in CHCl<sub>3</sub>) yielded methyl 6-(*N*-benzyl) amino-2-azido-3-*O*-benzyl-2,6-dideoxy- $\alpha$ -L-idopyranoside **13** as a pale yellow oil (17 mg, 66% over two steps). <sup>1</sup>H NMR (300 MHz, CDCl<sub>3</sub>):  $\delta$  7.41–7.29 (m, 10H), 4.80 (d, 1H, *J* = 11.7 Hz), 4.74 (d, 1H, *J* = 11.7 Hz), 4.63 (d, 1H, *J* = 3.3 Hz), 4.17 (m, 1H), 3.97 (dd, 1H, *J* = 3.0, 3.3 Hz), 3.87 (d, 1H, *J* = 12.9 Hz), 3.81 (d, 1H, *J* = 12.9 Hz), 3.61 (dd, 1H, *J* = 3.6, 6.6 Hz), 3.50 (dd, 1H, *J* = 4.2, 6.6 Hz), 3.42 (s, 3H), 3.21 (dd, 1H, *J* = 4.2, 12.3 Hz), 2.97 (dd, 1H, *J* = 2.7, 12.3 Hz); <sup>13</sup>C NMR (75 MHz, C<sub>6</sub>D<sub>6</sub>):  $\delta$  138.8, 137.8, 128.6, 128.4, 128.2, 127.8, 127.4, 100.7, 79.4, 73.0, 72.6, 66.4, 60.4, 55.7, 53.9, 50.4; IR (thin film): 3328, 3023, 2920, 2853, 2103, 1644, 1494, 1452, 1357, 1266, 1109, 1075, 1049, 967 cm<sup>-1</sup>; [ $\alpha$ ]<sub>D</sub><sup>20</sup> = –55.8 (*c* 0.67 CHCl<sub>3</sub>); HRESI-MS: *m/z* calcd for C<sub>21</sub>H<sub>24</sub>N<sub>4</sub>O<sub>4</sub>Na [M+H]<sup>+</sup> 399; found: 398.96.

Neosamine B methyl glycoside peracetate (**15**)

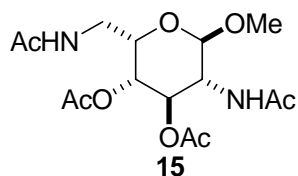

The synthesis of **15** has been previously described (see Ref. 19 in the main text). Compound **13** (15 mg, 0.038 mmol) was treated with 20% Pd(OH)<sub>2</sub> on carbon (52 mg) in 80% AcOH (6 mL), and stirred at 60 °C under a positive hydrogen atmosphere for 12 h. The mixture was passed through Celite, which was washed thoroughly with H<sub>2</sub>O (3 × 10 mL) and MeOH (3 × 20 mL). The combined filtrates were concentrated and azeotroped with toluene (3 × 10 mL) to yield neosamine B methyl glycoside **14** as a red-brown oil. The crude product was dissolved in 70% aqueous AcOH (5 mL) and stirred at 70 °C for 2 h, then concentrated and azeotroped with toluene (3 × 10 mL). The crude 2,6-*N,N'*-diacetate was further acetylated by treatment with Ac<sub>2</sub>O (2 mL) in pyridine (4 mL) at rt for 12 h. The mixture was concentrated, azeotroped with toluene (3 × 10 mL), and purified by preparative TLC (10% MeOH in CHCl<sub>3</sub>) to afford peracetate **15** as a white solid (7 mg, 52% over three steps). <sup>1</sup>H NMR (300 MHz, CDCl<sub>3</sub>): δ 6.09 (d, 1H, J = 9.9 Hz), 5.87 (m, 1H), 4.94 (bs, 1H), 4.79 (m, 1H), 4.59 (bs 1H), 4.25 (m, 2H), 3.38 (s, 3H), 3.48 (dd, 1H, J = 6.9, 14.1 Hz), 3.30 (dt, 1H, J = 14.1, 6.6 Hz), 2.21 (s, 3H), 2.11 (s, 3H), 2.02 (m, 6H); <sup>13</sup>C NMR (100 MHz, CDCl<sub>3</sub>): δ 170.2, 169.4, 169.3, 168.8, 100.6, 67.8, 67.4, 64.0, 55.6, 46.8, 38.9, 23.4, 23.3, 20.9, 20.8; IR (thin film): 3287, 3091, 2925, 1739, 1659, 1556, 1434, 1370, 1246, 1034 cm<sup>-1</sup>; [α]<sub>D</sub><sup>20</sup> = -15.8 (c 0.47 CHCl<sub>3</sub>); ESI-HRMS *m/z* calcd for C<sub>15</sub>H<sub>25</sub>N<sub>2</sub>O<sub>8</sub> [M+H]<sup>+</sup> 361.1611; found: 361.1613.

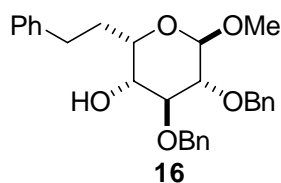

C5 phenethyl adduct **16** was prepared according to the general procedure described for ZnBr<sub>2</sub>-mediated organozinc addition to 4-EPs, and isolated as a colorless oil in 43% yield. <sup>1</sup>H NMR (300 MHz, CDCl<sub>3</sub>): δ 7.38–7.18 (m, 15H), 4.78 (bs, 1H), 4.65 (d, 1H, J = 12.3 Hz), 4.57 (d, 1H, 12.3 Hz), 4.54 (bs, 2H), 4.13 (dd, 1H, J = 4.2, 9.6 Hz), 3.76 (m, 1H), 3.55 (m, 2H), 3.45 (s, 3H), 3.02 (d, 1H, J = 11.1 Hz), 2.92 (m, 1H), 2.71 (m, 1H), 2.17 (m, 1H), 1.92 (m, 1H); <sup>13</sup>C NMR (100 MHz, CDCl<sub>3</sub>): δ 142.1, 137.9, 137.0, 128.5, 128.4, 128.3, 128.1, 127.9, 127.8, 125.8, 100.0, 73.9, 73.8, 72.4, 71.9, 68.6, 66.9, 55.6, 33.1, 32.1; IR (thin film): 3519, 3064, 3023, 2910, 2853, 1602, 1496, 1452, 1148, 1104, 1073, 1029 cm<sup>-1</sup>; [α]<sub>D</sub><sup>20</sup> = -5.2 (c 0.53 CHCl<sub>3</sub>); ESI-MS: *m/z* calcd for C<sub>28</sub>H<sub>32</sub>O<sub>5</sub>Na [M+Na]<sup>+</sup> 471; found: 471.20.

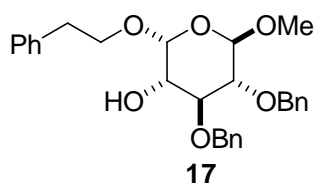

C5 phenethoxy adduct **17** was isolated as a byproduct of the reaction above, as a colorless oil in 24% yield. <sup>1</sup>H NMR (300 MHz, CDCl<sub>3</sub>): δ 7.28–7.14 (m, 15H), 4.83 (d, 1H, J = 11.4 Hz), 4.82 (d, 1H, 11.1 Hz), 4.75 (d, 1H, J = 11.1 Hz), 4.66 (d, 1H, J = 11.1 Hz), 4.35 (m, 2H), 4.12 (m, 1H), 3.73 (m, 1H), 3.56–3.38 (m, 6H), 2.95 (t, 2H, J = 8.1 Hz); <sup>13</sup>C NMR (75 MHz, CDCl<sub>3</sub>): δ 138.5, 138.3, 128.9, 128.4, 128.3, 128.0, 127.9, 127.7, 126.4, 101.6, 99.6, 81.8, 81.4, 75.0, 74.6, 73.9, 70.5, 56.8, 36.2.



*Higher-order monosaccharides with L-ido configuration:*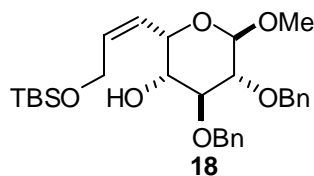

A solution of **9i** (51 mg, 0.1 mmol) in hexanes (6 mL) was treated with Lindlar catalyst (14 mg) and quinoline (13 mg) at rt and stirred for 2h, then exposed to a positive hydrogen atmosphere for 3h at rt with stirring. The reaction mixture was filtered, washed with 1 M HCl, saturated NaHCO<sub>3</sub>, and brine, dried over anhydrous Na<sub>2</sub>SO<sub>4</sub>, and concentrated to afford *cis*-alkene **18** as a light yellow oil in quantitative yield. <sup>1</sup>H NMR (300 MHz, CDCl<sub>3</sub>): δ 7.40–7.22 (m, 10H), 5.85–5.72 (m, 2H), 4.89 (dd, 1H, J = 1.8, 6.3 Hz), 4.75 (bs, 1H), 4.68 (d, 1H, J = 12.3 Hz), 4.61 (d, 1H, J = 12.3 Hz), 4.56 (s, 2H), 4.34 (m, 2H), 3.76 (m, 1H), 3.58 (m, 2H), 3.46 (s, 3H), 3.16 (d, 1H, J = 10.5 Hz); <sup>13</sup>C NMR (75 MHz, CDCl<sub>3</sub>): δ 137.9, 137.0, 134.0, 128.5, 128.4, 128.1, 127.9, 127.7, 126.4, 100.1, 74.1, 72.6, 69.4, 64.1, 59.7, 56.0, 25.9, 18.3, –5.2.

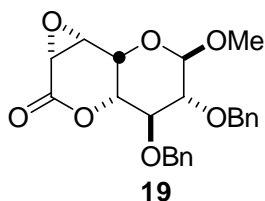

Unsaturated lactone **9m** (20 mg, 0.051 mmol) was dissolved in pyridine (2 mL) and treated with commercial bleach (5% NaOCl, 0.2 mL) at 0 °C. The resulting yellowish solution was warmed to rt and stirred for 4 h, then quenched with saturated Na<sub>2</sub>S<sub>2</sub>O<sub>3</sub> (3 mL), extracted with EtOAc (3 × 15 mL), washed with brine, dried over Na<sub>2</sub>SO<sub>4</sub> and concentrated under reduced pressure. Purification by preparative TLC (25% EtOAc in hexanes) yielded 6,7-epoxide **19** as a single stereoisomer and a white solid (16 mg, 78%). <sup>1</sup>H NMR (300 MHz, CD<sub>2</sub>Cl<sub>2</sub>): δ 7.30 (m, 10H), 4.72 (m, 1H), 4.68 (m, 1H), 4.60 (d, 1H, J = 11.7 Hz), 4.57 (bs, 2H), 4.51 (d, 1H, J = 11.7 Hz), 4.43 (t, 1H, J = 2.4 Hz), 3.78 (t, 1H, J = 3.3 Hz), 3.74 (t, 1H, J = 3.6 Hz), 3.61 (d, 1H, 3.6 Hz), 3.51 (m, 1H), 3.42 (s, 3H); <sup>13</sup>C NMR (100 MHz, C<sub>6</sub>D<sub>6</sub>): δ 165.4, 137.4, 137.0, 128.5, 128.3, 128.1, 127.9, 127.7, 101.3, 74.0, 73.8, 73.2, 72.4, 72.3, 60.0, 55.9, 52.7, 48.4; IR (thin film): 3028, 2915, 1749, 1496,

1452, 1365, 1323, 1261, 1117, 1104  $\text{cm}^{-1}$ ;  $[\alpha]_{\text{D}}^{20} = -101$  ( $c$  1.0  $\text{CHCl}_3$ ); ESI-MS:  $m/z$  calcd for  $\text{C}_{23}\text{H}_{24}\text{O}_7\text{Na}$   $[\text{M}+\text{Na}]^+$  435; found: 434.95.

Methyl 2,3-di-*O*-benzyl-6,7-isopropylidene-*D*-threo- $\alpha$ -*L*-ido-octono-4,8-lactone (**20**)

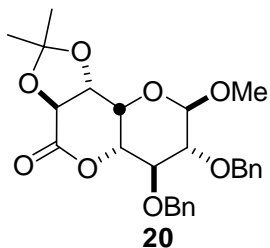

A solution of *trans*-alkene **9h** (50 mg, 0.097 mmol) in THF (2 mL) was treated with TBAF in THF (1 M, 100  $\mu\text{L}$ ) at rt. After stirring for 5 min, the reaction mixture was concentrated and redissolved in a 2:1 mixture of  $\text{Ac}_2\text{O}$  and pyridine (6 mL) and stirred for 12 h at rt. The mixture was concentrated and azeotroped with toluene ( $3 \times 10$  mL) and passed through a silica gel plug to afford the intermediate 4,8-diacetate as a colorless oil. This intermediate was subjected to the catalytic osmylation conditions previously described to yield the intermediate 6,7-diol as a 5:1 mixture of diastereoisomers, the major product having a *D*-threo-*L*-ido configuration. The crude diol was then dissolved in THF (3 mL) and treated with 2-methoxypropene (120  $\mu\text{L}$ , 0.1 mmol) and *d*-CSA (4 mg, 0.017 mmol) at 0  $^\circ\text{C}$ . The mixture was warmed to rt and stirred for 4 h, then quenched with  $\text{Et}_3\text{N}$  at 0  $^\circ\text{C}$  and concentrated to give the crude acetonide as a yellow oil. This was redissolved in MeOH (3 mL), treated with  $\text{K}_2\text{CO}_3$  (25 mg), and stirred for 1 h at rt. The resulting white suspension was filtered and washed with EtOAc ( $3 \times 25$  mL). The combined organic washings were concentrated and the residue was dried *in vacuo* for 2 h, then dissolved in  $\text{CH}_2\text{Cl}_2$  (3 mL) and treated with *bis*-acetoxyiodobenzene (96 mg, 0.3 mmol) and TEMPO (3 mg, 20 mol%) at rt. The reaction mixture was stirred for 3 h, then quenched with saturated  $\text{Na}_2\text{S}_2\text{O}_3$ , extracted with  $\text{CH}_2\text{Cl}_2$  ( $3 \times 15$  mL), followed by a standard aqueous workup. The residue was purified by silica gel chromatography (33.3% EtOAc in hexanes) to afford *D*-threo-*L*-ido-octopyranoside derivative **20** as a colorless oil (17 mg, 37% over six steps). The relative stereochemistry was confirmed by NOE difference spectroscopy (see spectra below).  $^1\text{H}$  NMR (300 MHz,  $\text{C}_6\text{D}_6$ ):  $\delta$  7.43 (d, 2H, J

= 7.5 Hz), 7.35 (d, 2H,  $J$  = 7.5 Hz), 7.22 (m, 6H), 4.83 (d, 1H,  $J$  = 11.7 Hz), 4.75 (d, 1H,  $J$  = 11.7 Hz), 4.70 (d, 1H,  $J$  = 11.7 Hz), 4.63 (d, 1H,  $J$  = 11.7 Hz), 4.54 (d, 1H,  $J$  = 4.8 Hz), 4.50 (d, 1H,  $J$  = 11.1 Hz), 4.04 (dd, 1H,  $J$  = 1.2, 4.2 Hz), 3.94 (dd, 1H,  $J$  = 1.2, 6.0 Hz), 3.57 (dd, 1H,  $J$  = 3.6, 9.9 Hz), 3.43 (dd, 1H,  $J$  = 3.3, 11.1 Hz), 3.37 (dd, 1H,  $J$  = 4.8, 9.9 Hz), 3.10 (s, 3H), 1.35 (s, 3H), 1.33 (s, 3H);  $^{13}\text{C}$  NMR (100 MHz,  $\text{C}_6\text{D}_6$ ):  $\delta$  165.3, 138.2, 130.5, 127.4, 112.7, 103.2, 83.9, 79.6, 79.2, 74.0, 73.7, 73.4, 70.0, 64.1, 54.4, 26.4, 26.2; IR (thin film): 2925, 1780, 1496, 1452, 1372, 1227, 1163, 1111, 1062, 1037, 1024  $\text{cm}^{-1}$ ;  $[\alpha]_{\text{D}}^{20} = -52.5$  ( $c$  0.67  $\text{CHCl}_3$ ); ESI-MS:  $m/z$  calcd for  $\text{C}_{26}\text{H}_{30}\text{O}_8\text{Na}$   $[\text{M}+\text{Na}]^+$  493; found:493.06.

Methyl 2,3-di-*O*-benzyl-6,7-isopropylidene-L-erythro- $\alpha$ -L-ido-octono-4,8-lactone (**21**)

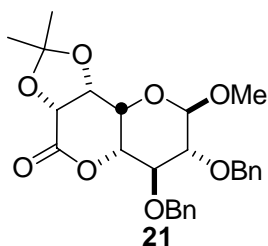

Compound **21** was obtained from *cis*-alkene **18** using the same synthetic sequence described above, and isolated as colorless oil (15 mg, 34% over six steps). The relative stereochemistry was confirmed by NOE difference spectroscopy (see spectra below).  $^1\text{H}$  NMR (300 MHz,  $\text{C}_6\text{D}_6$ ):  $\delta$  7.39 (d, 2H,  $J$  = 7.5 Hz), 7.27 (d, 2H,  $J$  = 6.9 Hz), 7.21 (m, 6 H), 4.78 (d, 1H,  $J$  = 2.7 Hz), 4.46 (m, 4H), 4.20 (m, 1H), 4.08 (d, 1H,  $J$  = 8.7 Hz), 3.94 (t, 1H,  $J$  = 3.9 Hz), 3.84 (m, 1H), 3.81 (dd, 1H,  $J$  = 3.9, 8.7 Hz), 3.53 (dd, 1H,  $J$  = 3.0, 3.6 Hz), 3.20 (s, 3H), 1.52 (s, 3H), 1.22 (s, 3H);  $^{13}\text{C}$  NMR (75 MHz,  $\text{C}_6\text{D}_6$ ):  $\delta$  167.6, 137.7, 137.2, 128.6, 128.4, 128.2, 128.0, 127.8, 111.6, 100.7, 74.2, 73.9, 73.6, 72.5, 72.3, 71.5, 60.0, 55.5, 25.8, 25.4; IR (thin film): 2930, 1755, 1496, 1452, 1372, 1204, 1111, 1094, 1037, 962  $\text{cm}^{-1}$ ;  $[\alpha]_{\text{D}}^{20} = -78.3$  ( $c$  0.67  $\text{CHCl}_3$ ); ESI-MS:  $m/z$  calcd for  $\text{C}_{26}\text{H}_{30}\text{O}_8\text{Na}$   $[\text{M}+\text{Na}]^+$  493; found:493.06.

Methyl 2,3-di-*O*-benzyl-D-erythro- $\alpha$ -L-ido-octono-4,8-lactone

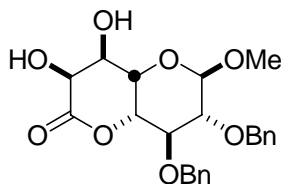

Unsaturated lactone **9m** (27 mg) was subjected to the catalytic osmylation previously described to yield the corresponding 6,7-diol as a single diastereomer and a colorless oil (26 mg, 87% yield).  $^1\text{H}$  NMR (300 MHz,  $\text{CDCl}_3$ ):  $\delta$  7.41–7.24 (m, 10H), 4.79–4.63 (m, 5H), 4.55 (d, 1H,  $J$  = 12.3 Hz), 4.54 (d, 1H,  $J$  = 3.0 Hz), 4.41 (dd, 1H,  $J$  = 3.6, 4.2 Hz), 4.35 (dd, 1H,  $J$  = 3.0, 3.9 Hz), 3.85 (dd, 1H,  $J$  = 4.2, 6.3 Hz), 3.61 (bs, 1H), 3.54 (dd, 1H,  $J$  = 3.6, 6.3 Hz), 3.43 (s, 3H), 3.22 (bs, 1H);  $^{13}\text{C}$  NMR (75 MHz,  $\text{CDCl}_3$ ):  $\delta$  172.8, 137.6, 137.4, 128.4, 128.3, 128.0, 127.8, 102.0, 78.9, 76.4, 76.1, 73.1, 73.0, 68.8, 67.9, 64.7, 55.7; IR (thin film): 3432, 3059, 3028, 2915, 1744, 1496, 1452, 1364, 1197, 1114, 1042, 946  $\text{cm}^{-1}$ ;  $[\alpha]_D^{20}$  =  $-82.2$  ( $c$  0.67  $\text{CHCl}_3$ ); ESI-MS:  $m/z$  calcd for  $\text{C}_{23}\text{H}_{26}\text{O}_8\text{Na}$   $[\text{M}+\text{Na}]^+$  453; found:452.90.

Methyl 6,7-di-*O*-acetyl-2,3-di-*O*-benzyl-D-erythro- $\alpha$ -L-ido-octono-4,8-lactone (**22**)

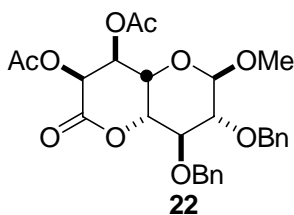

Compound **22** was prepared from the diol above (4 mg, 91% yield), and its relative stereochemistry was confirmed by NOE difference spectroscopy (see spectra below).  $^1\text{H}$  NMR (300 MHz,  $\text{CDCl}_3$ ):  $\delta$  7.38–7.24 (m, 10H), 5.88 (d, 1H,  $J$  = 3.3 Hz), 5.54 (dd, 1H,  $J$  = 2.7, 3.6 Hz), 4.77 (d, 1H,  $J$  = 3.6 Hz), 4.72 (s, 2H), 4.66 (d, 1H,  $J$  = 11.7 Hz), 4.59 (dd, 1H,  $J$  = 3.3, 3.6 Hz), 4.57 (d, 1H,  $J$  = 11.7 Hz), 4.34 (dd, 1H,  $J$  = 3.3, 4.2 Hz), 3.87 (dd, 1H,  $J$  = 4.2, 6.6 Hz), 3.53 (dd, 1H,  $J$  = 3.6, 6.6 Hz), 3.44 (s, 3H); ESI-MS:  $m/z$  calcd for  $\text{C}_{26}\text{H}_{30}\text{O}_8\text{Na}$   $[\text{M}+\text{Na}]^+$  537; found:537.03.

Methyl 2,3-di-*O*-benzyl-7-deoxy-L-glycero- $\alpha$ -L-ido-octono-4,8-lactone (**23**)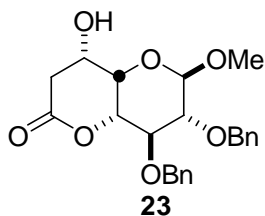

A solution of (PhSe)<sub>2</sub> (60 mg, 0.19 mmol) in EtOH (1 mL) was treated with NaBH<sub>4</sub> (14.5 mg, 0.38 mmol) under Ar at rt and stirred for 5 min before being cooled to 0 °C. The reaction mixture was then treated with the dropwise addition of AcOH (14 μL, 0.38 mmol), then stirred for 5 min at rt to generate the unstable phenylselenenol. This was immediately treated with a solution of epoxide **19** (10 mg, 0.024 mmol) in EtOH (0.5 mL) and stirred for 15 min at rt, then diluted with EtOAc (3 mL). The reaction was quenched with NaCl solution (2 mL), extracted with EtOAc (2 × 15 mL), dried over anhydrous Na<sub>2</sub>SO<sub>4</sub>, and concentrated under reduced pressure. Purification with preparative TLC (50% EtOAc in hexanes) yielded C6 alcohol **23** as a colorless oil (9 mg, 90%). <sup>1</sup>H NMR (300 MHz, C<sub>6</sub>D<sub>6</sub>:CD<sub>3</sub>OD = 5:1): δ 7.31–7.03 (m, 10H), 4.70 (t, 1H, J = 3.6 Hz), 4.69 (d, 1H, J = 11.7 Hz), 4.62 (d, 1H, J = 3.6 Hz), 4.59 (d, 1H, J = 11.7 Hz), 4.56 (d, 1H, J = 11.7 Hz), 4.47 (d, 1H, J = 11.7 Hz), 4.18 (dd, 1H, J = 3.6, 4.2 Hz), 4.09 (dd, 1H, J = 4.2, 8.4 Hz), 3.84 (dd, 1H, J = 3.0, 7.5 Hz), 3.52 (dd, 1H, J = 3.6, 7.8 Hz), 3.16 (s, 3H), 2.85 (dd, 1H, J = 4.2, 17.1 Hz), 2.61 (dd, 1H, J = 4.5, 17.1 Hz); <sup>13</sup>C NMR (75 MHz, 5:1 C<sub>6</sub>D<sub>6</sub>:CD<sub>3</sub>OD): δ 170.3, 138.5, 138.4, 102.6, 78.3, 77.4, 77.3, 73.3, 73.2, 65.8, 65.3, 55.0, 35.2; IR (thin film): 3432, 3065, 3028, 2920, 1731, 1496, 1452, 1365, 1235, 1114, 1070, 1042 cm<sup>-1</sup>; [α]<sub>D</sub><sup>20</sup> = –2.2 (c 0.67 CHCl<sub>3</sub>); ESI-MS: *m/z* calcd for C<sub>23</sub>H<sub>26</sub>O<sub>7</sub>Na [M+Na]<sup>+</sup> 426; found: 426.24.

**Table S1. Chemical Shifts and Coupling Constants of Select C4 acetates.**

| compd (C4 acetate)      | $\delta$ ( $^1\text{H}$ NMR, 300 MHz) | $J_{4,5}$ (Hz) |
|-------------------------|---------------------------------------|----------------|
| <b>9a</b> <sup>a</sup>  | 5.16                                  | 4.2            |
| <b>10a</b> <sup>a</sup> | 5.32                                  | 6.6            |
| <b>9b</b> <sup>a</sup>  | 5.11                                  | 2.4            |
| <b>10b</b> <sup>a</sup> | 5.43                                  | 5.4            |
| <b>9c</b> <sup>a</sup>  | 5.16                                  | 2.7            |
| <b>10c</b> <sup>a</sup> | 5.75                                  | 5.1            |
| <b>9d</b> <sup>b</sup>  | 5.09                                  | 2.7            |
| <b>10d</b> <sup>b</sup> | 5.66                                  | 3.6            |
| <b>9e</b> <sup>a</sup>  | 4.92                                  | 3.6            |
| <b>10e</b> <sup>a</sup> | 5.25                                  | 5.1            |
| <b>9f</b> <sup>b</sup>  | 5.32                                  | 5.4            |
| <b>10f</b> <sup>b</sup> | 5.08                                  | 4.2            |
| <b>9h</b> <sup>a</sup>  | 4.95                                  | 3.6            |
| <b>9k</b> <sup>a</sup>  | 5.02                                  | 1.2            |
| <b>9l</b> <sup>a</sup>  | 4.91                                  | 3.0            |

<sup>a</sup> CDCl<sub>3</sub>. <sup>b</sup> benzene-*d*<sub>6</sub>.

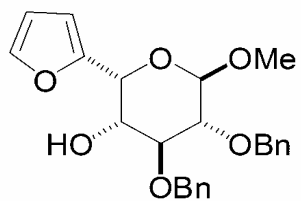

**9a**

$^1\text{H}$  NMR, 300MHz,  $\text{CDCl}_3$

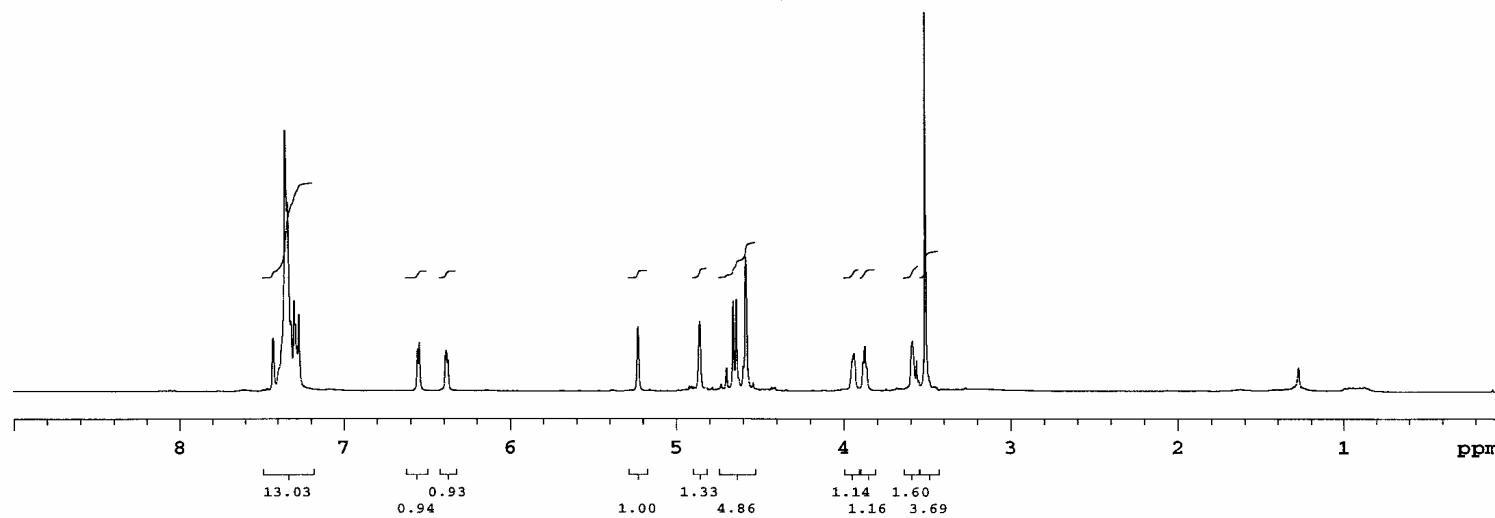

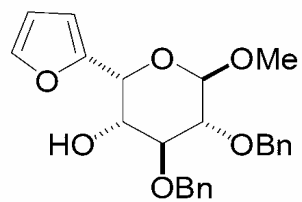

**9a**

$^{13}\text{C}$  NMR, 75MHz,  $\text{CDCl}_3$

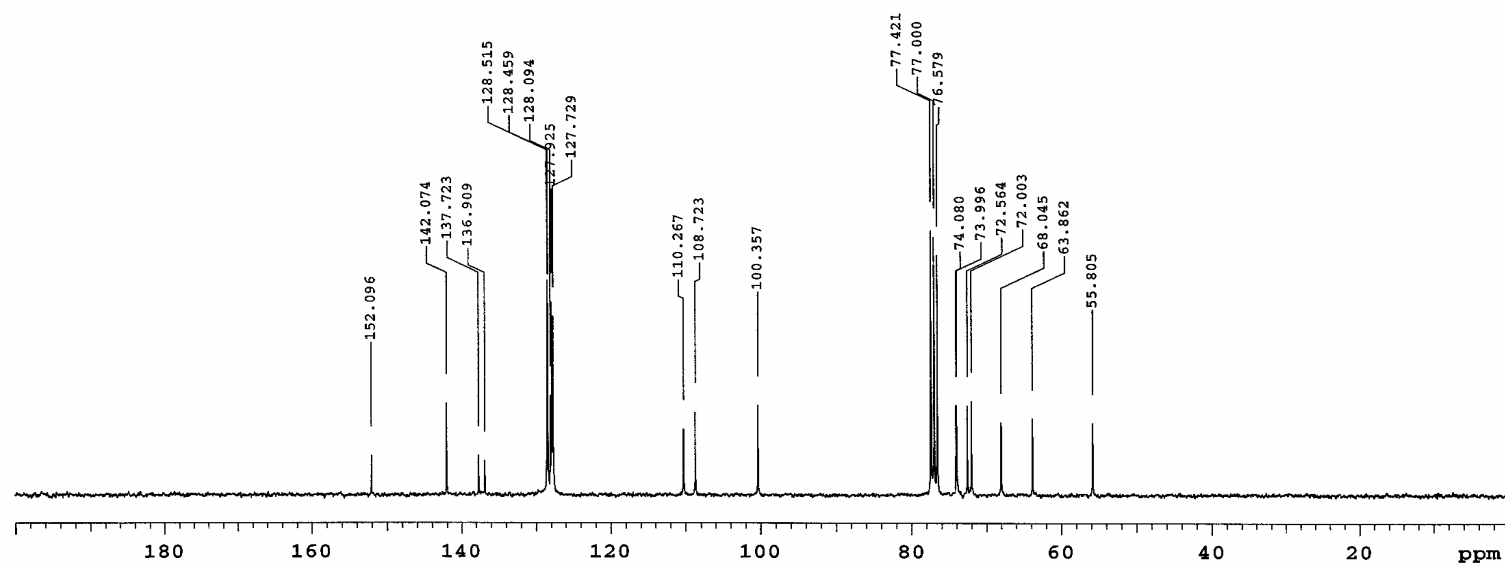



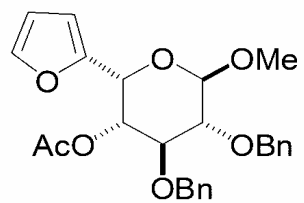

$^1\text{H}$  NMR, 300MHz,  $\text{CDCl}_3$

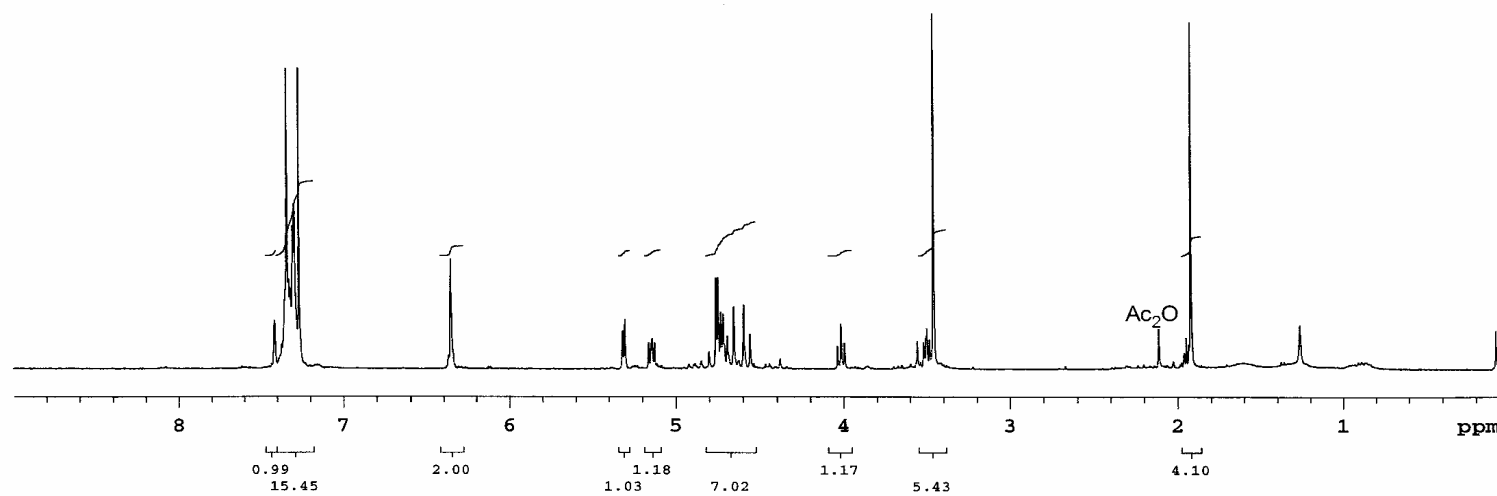

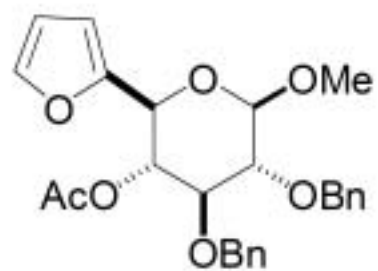

$^1\text{H}$  NMR, 300MHz,  $\text{CDCl}_3$

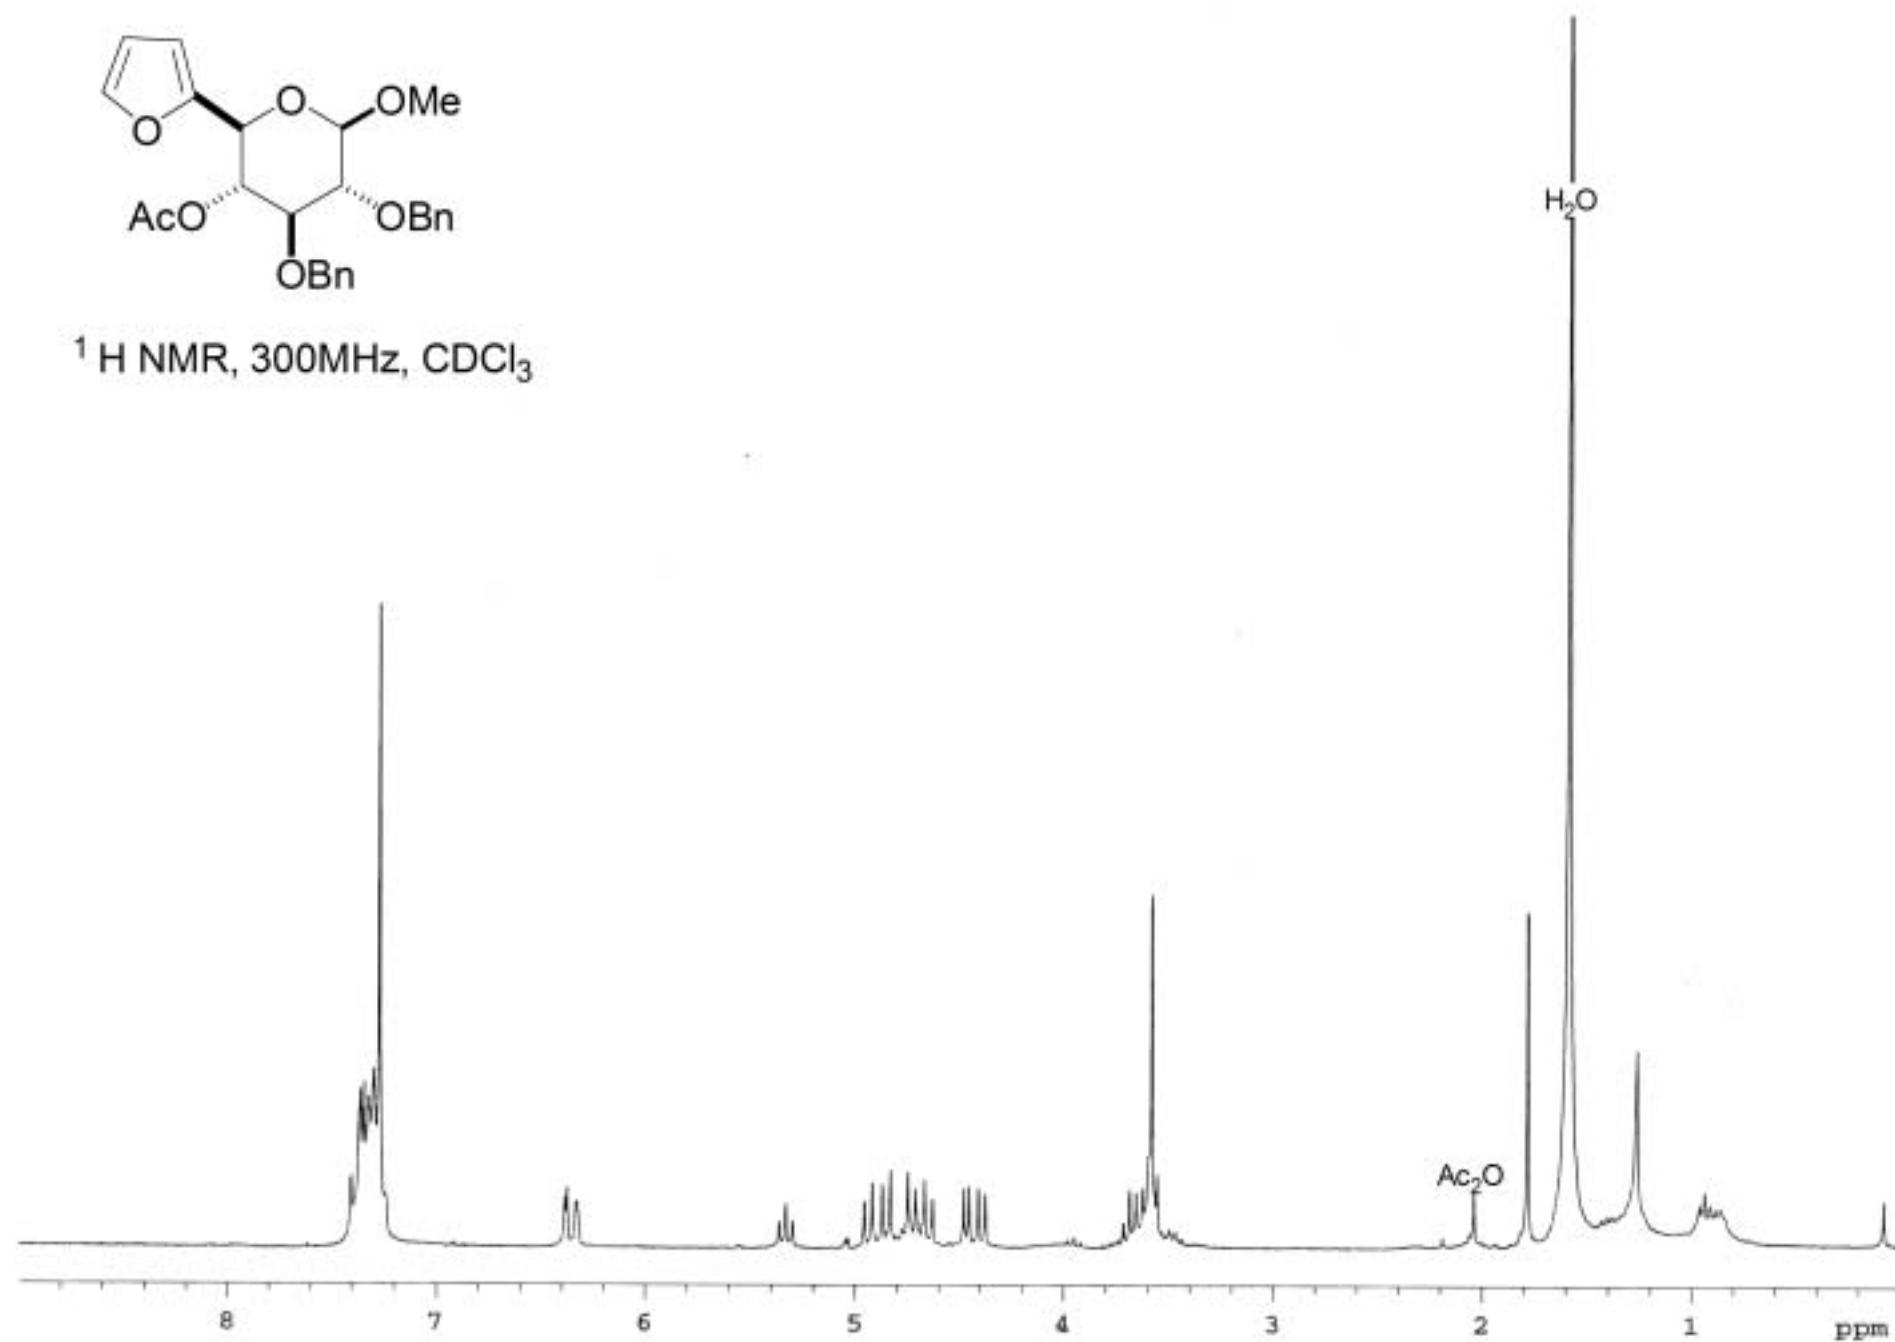

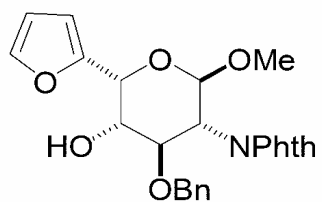

**10a**

$^1\text{H}$  NMR, 300MHz,  $\text{CDCl}_3$

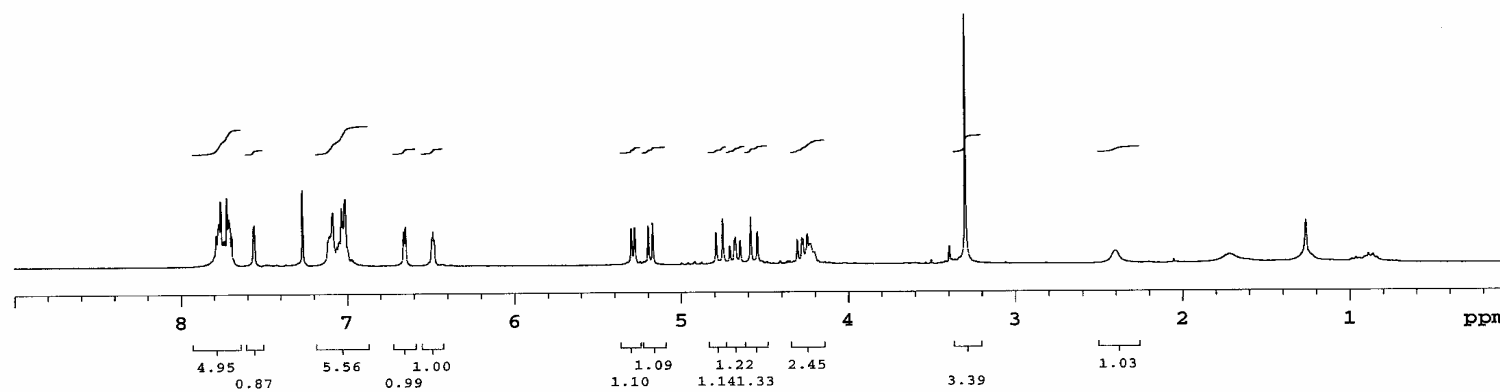

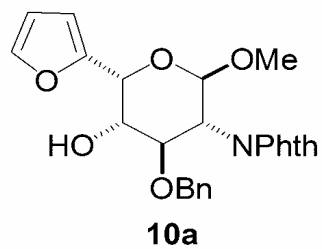

$^{13}\text{C}$  NMR, 75MHz,  $\text{CDCl}_3$

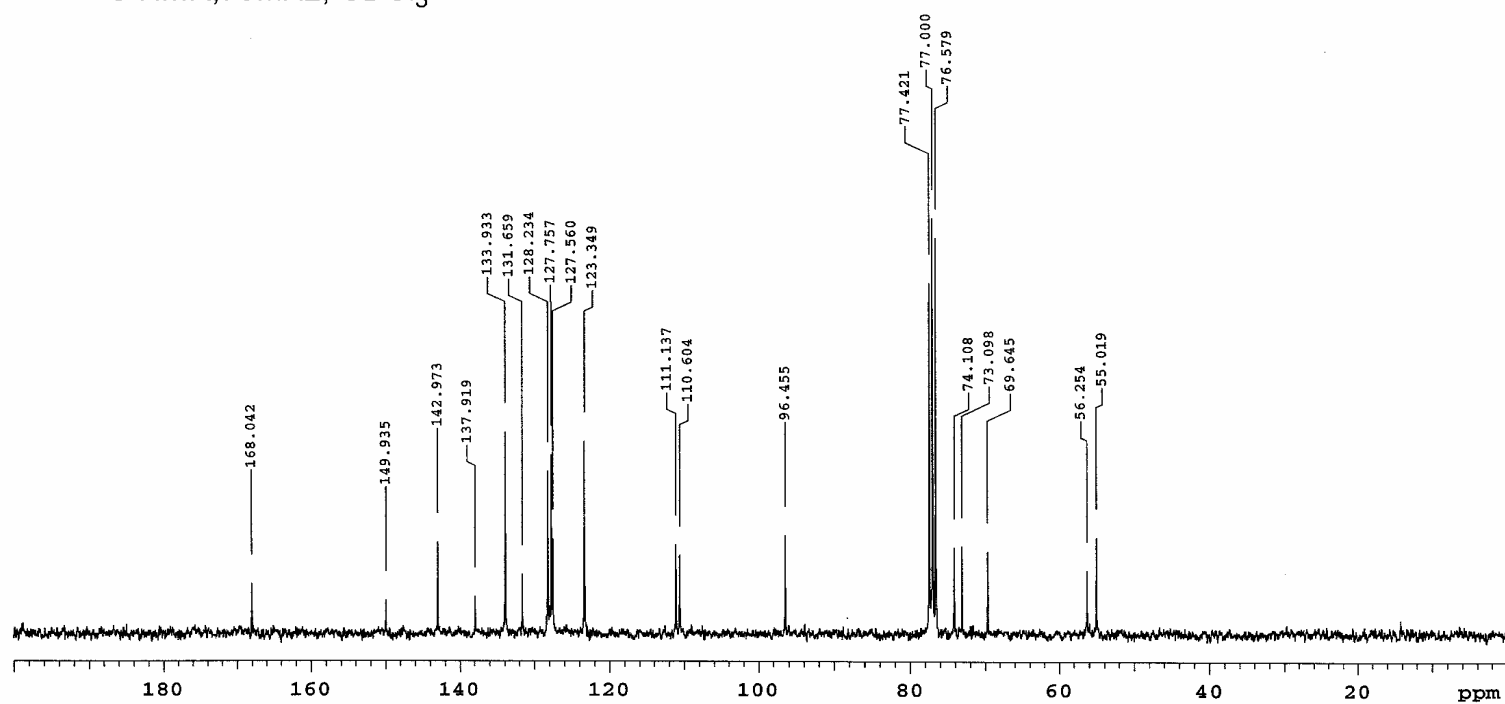

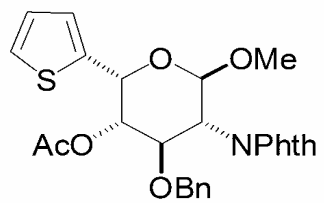

$^1\text{H}$  NMR, 300MHz,  $\text{CDCl}_3$

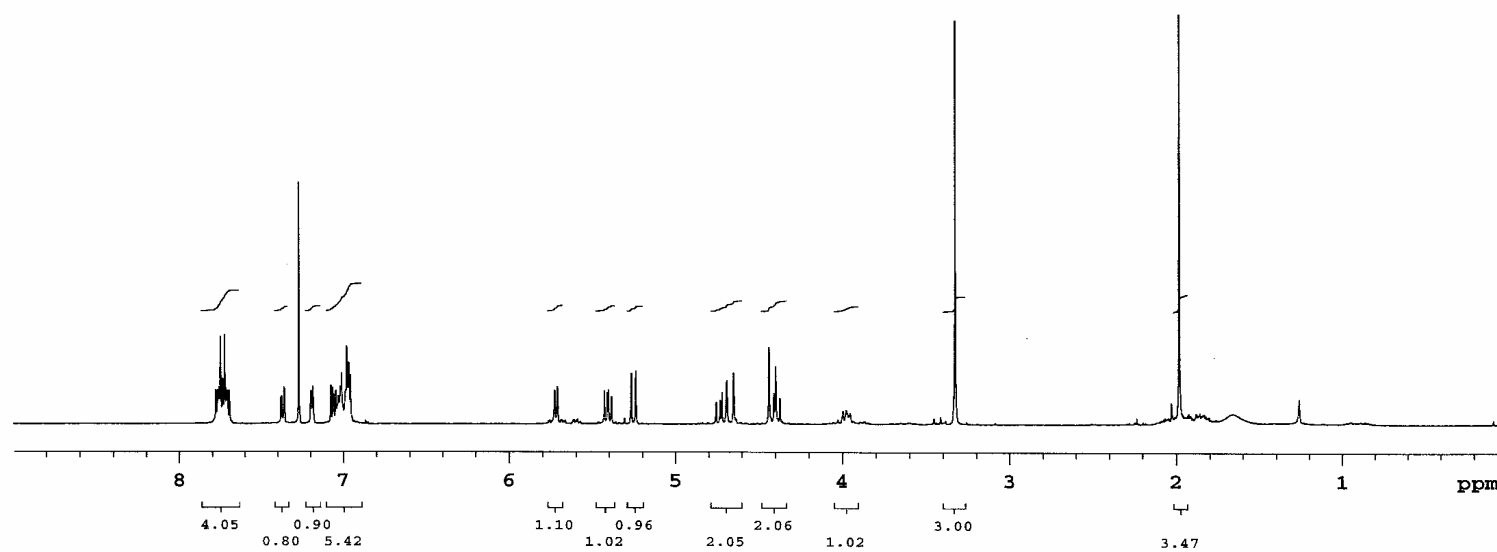

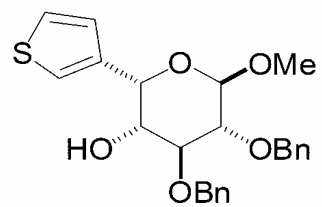

**9c**

$^1\text{H}$  NMR, 300MHz,  $\text{CDCl}_3$

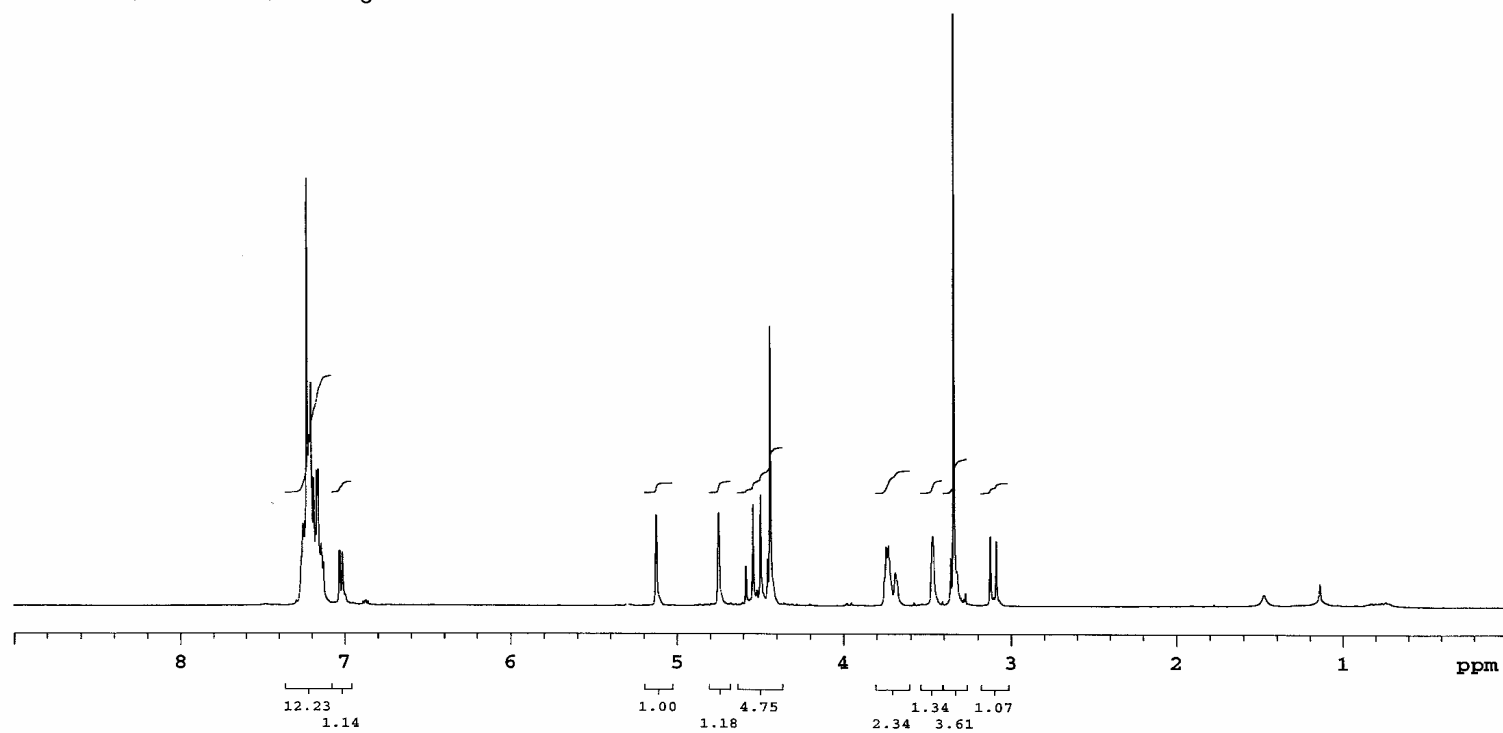

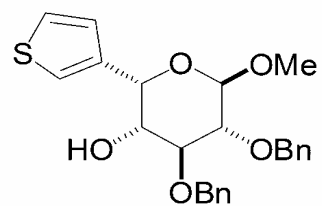

**9c**

$^{13}\text{C}$  NMR, 75MHz,  $\text{CDCl}_3$

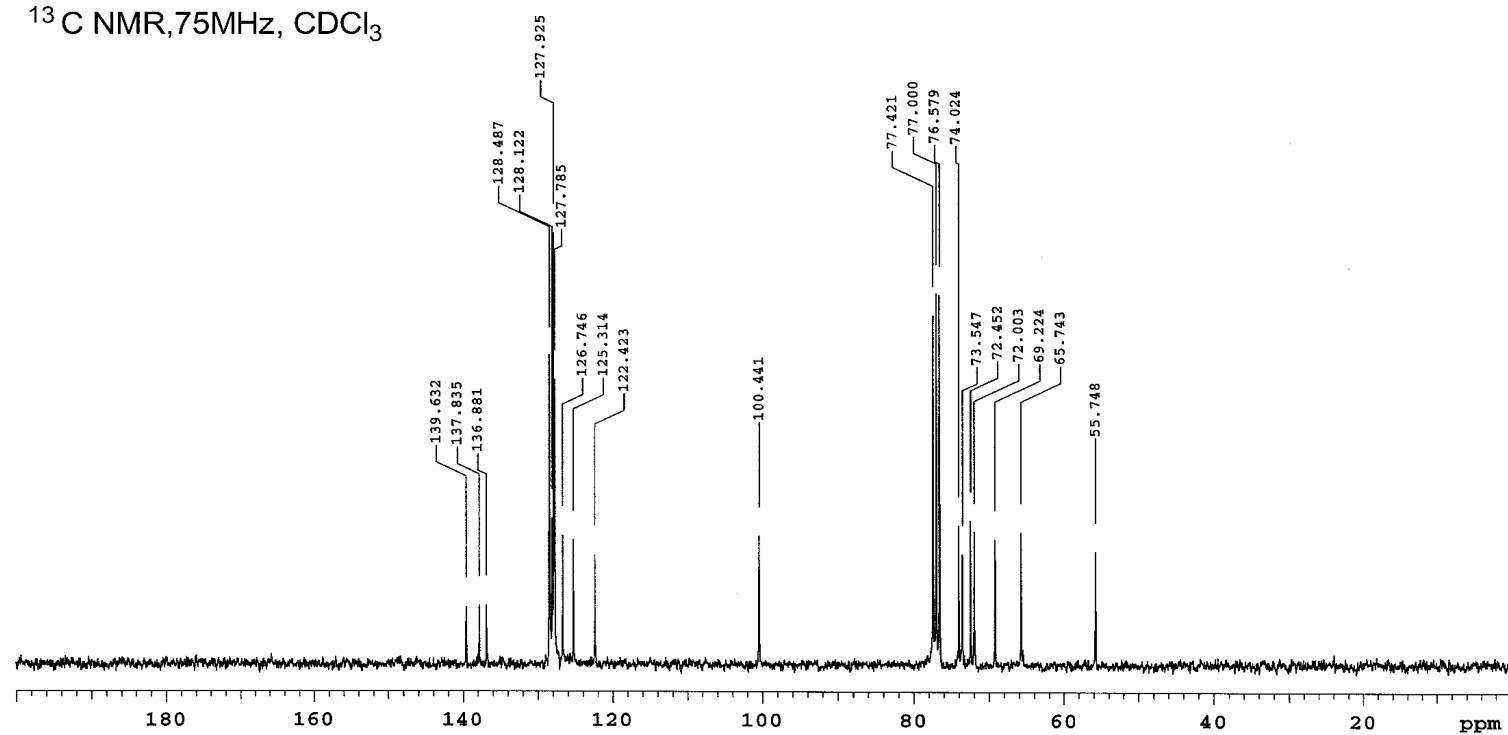

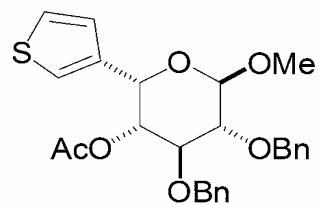

$^1\text{H}$  NMR, 300MHz,  $\text{CDCl}_3$

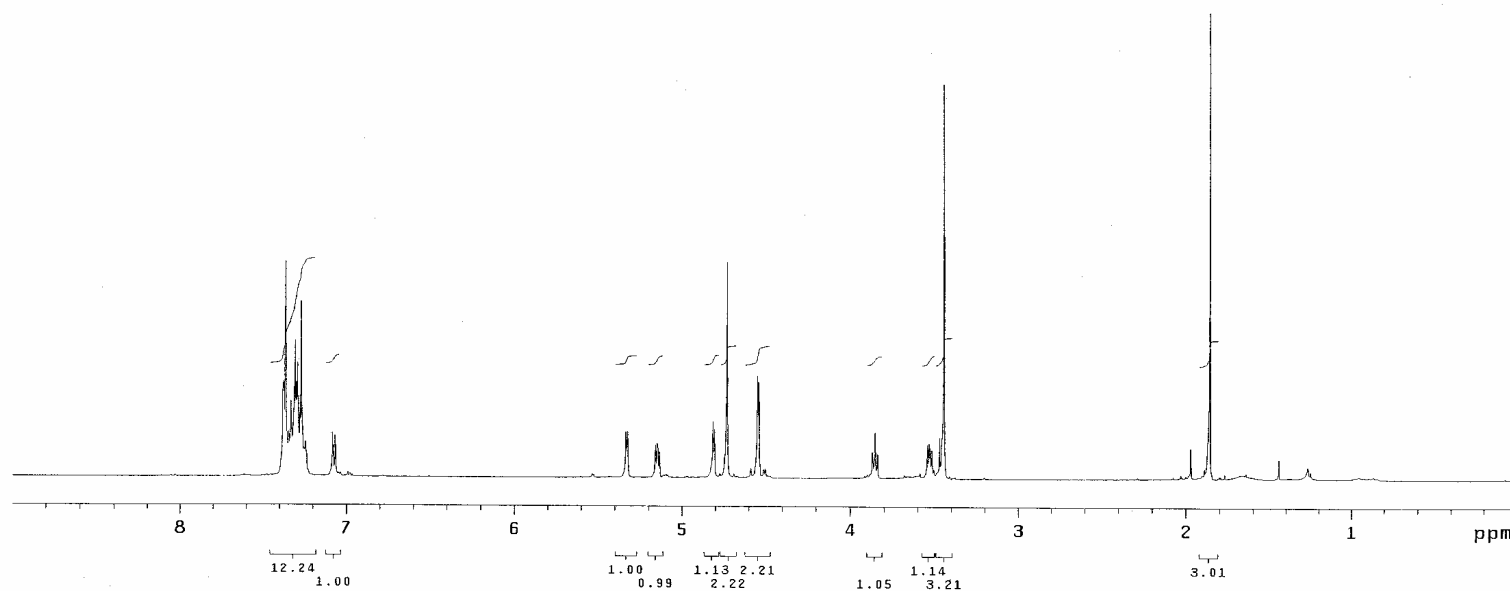



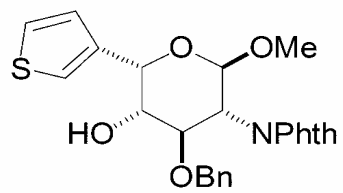

**10c**

$^1\text{H}$  NMR, 300MHz,  $\text{C}_6\text{D}_6$

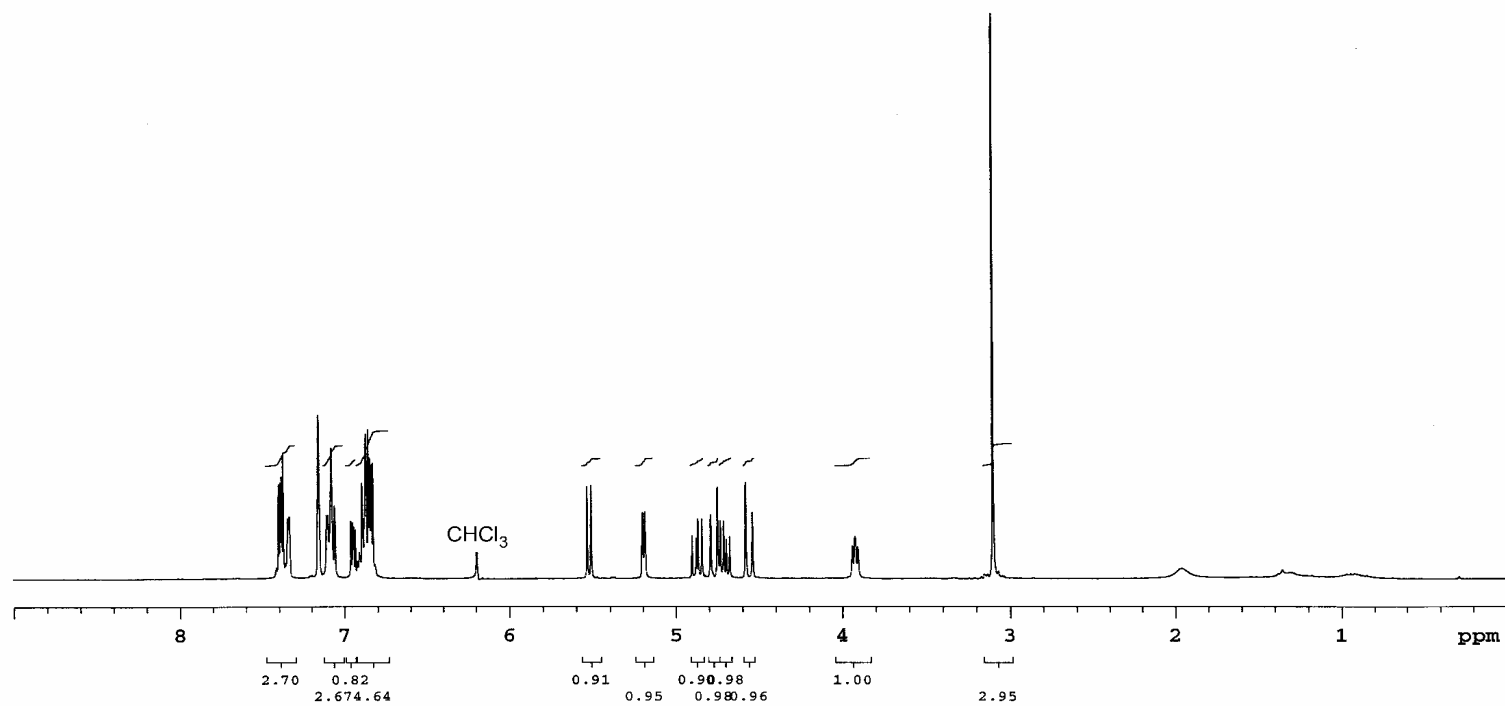

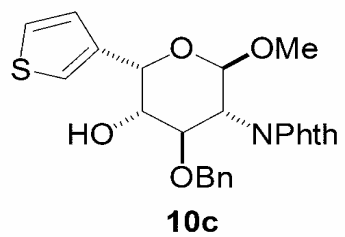

$^{13}\text{C}$  NMR, 75MHz,  $\text{CDCl}_3$

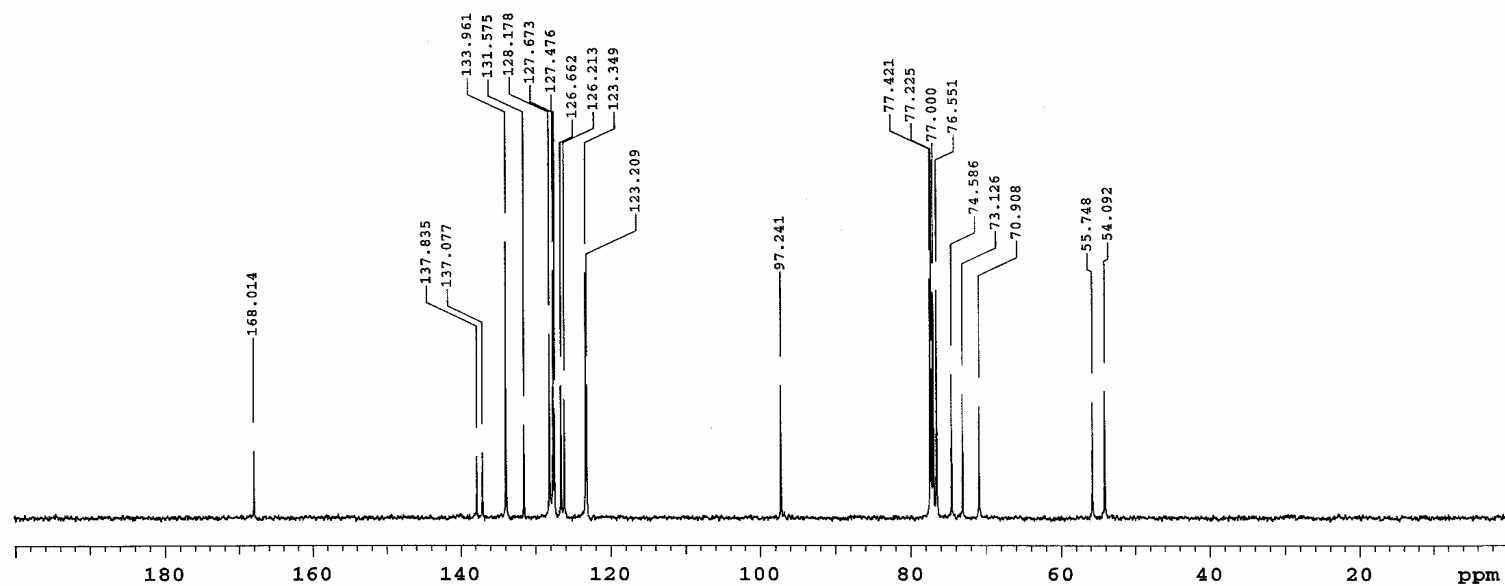

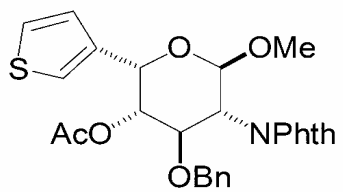

$^1\text{H}$  NMR, 300MHz,  $\text{CDCl}_3$

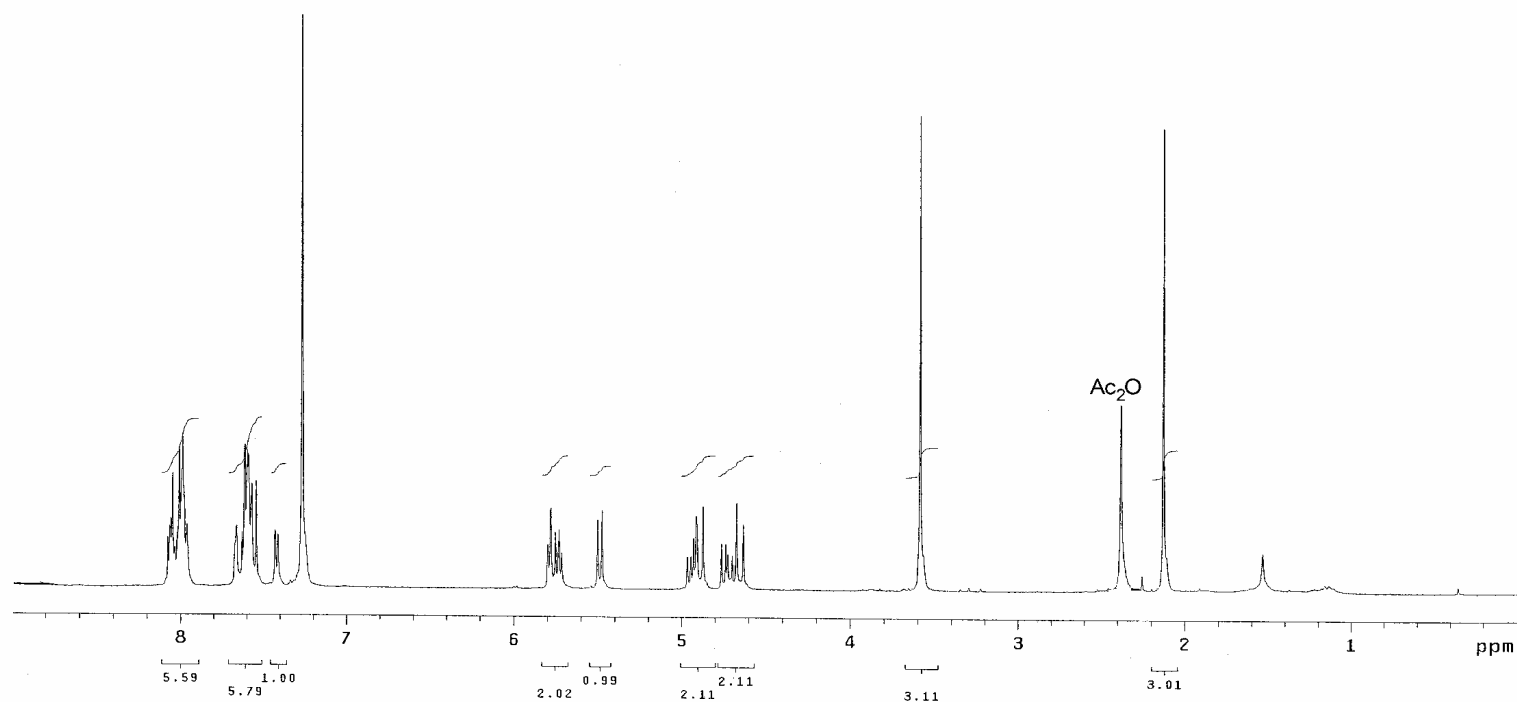

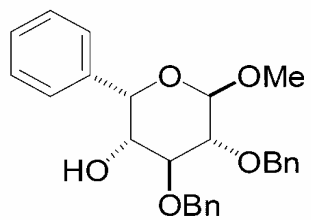

**9d**

$^1\text{H}$  NMR, 300MHz,  $\text{C}_6\text{D}_6$

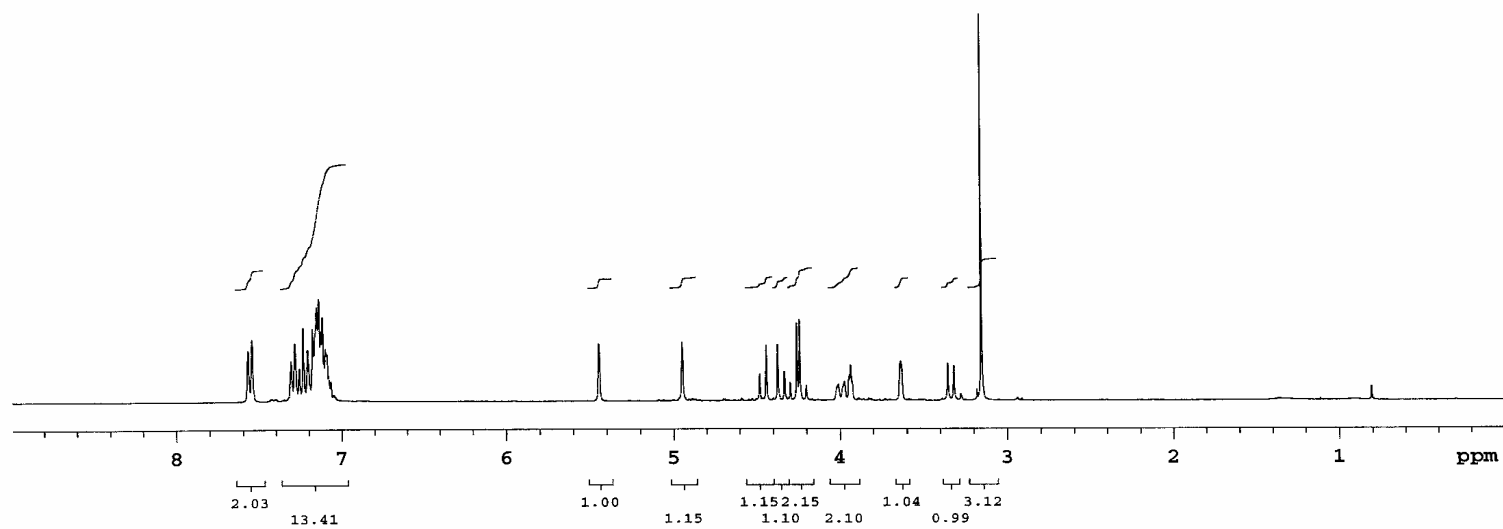

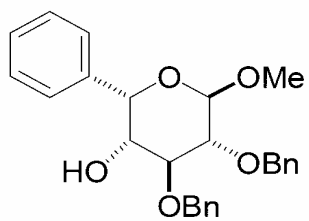

**9d**

$^{13}\text{C}$  NMR, 75MHz,  $\text{C}_6\text{D}_6$

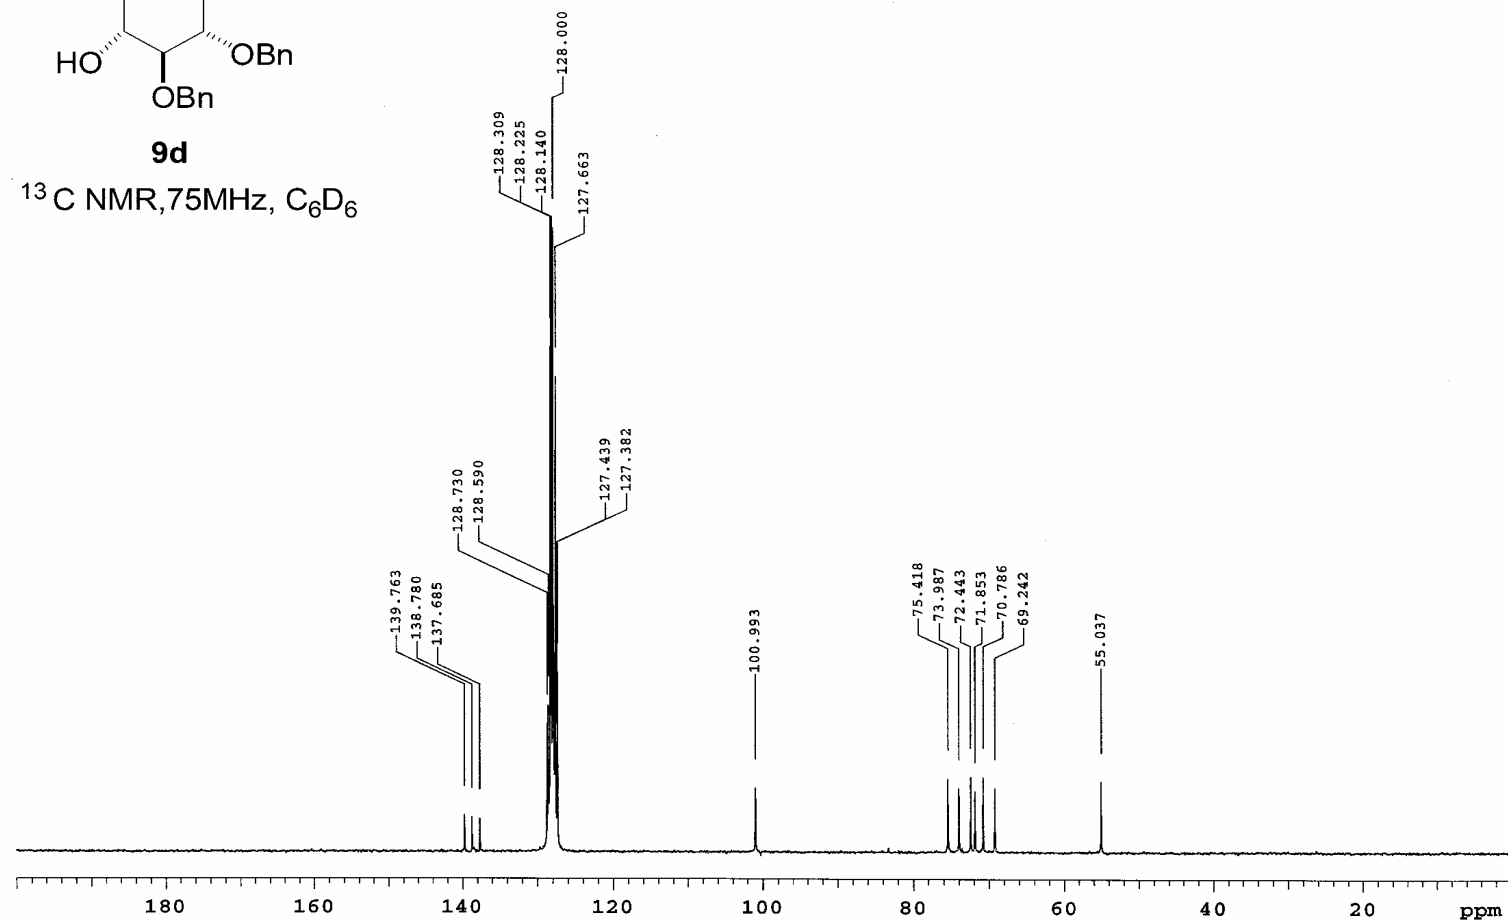

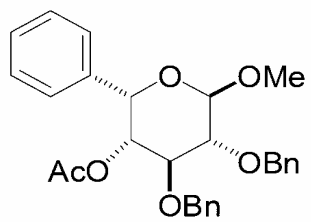

$^1\text{H}$  NMR, 300MHz,  $\text{C}_6\text{D}_6$

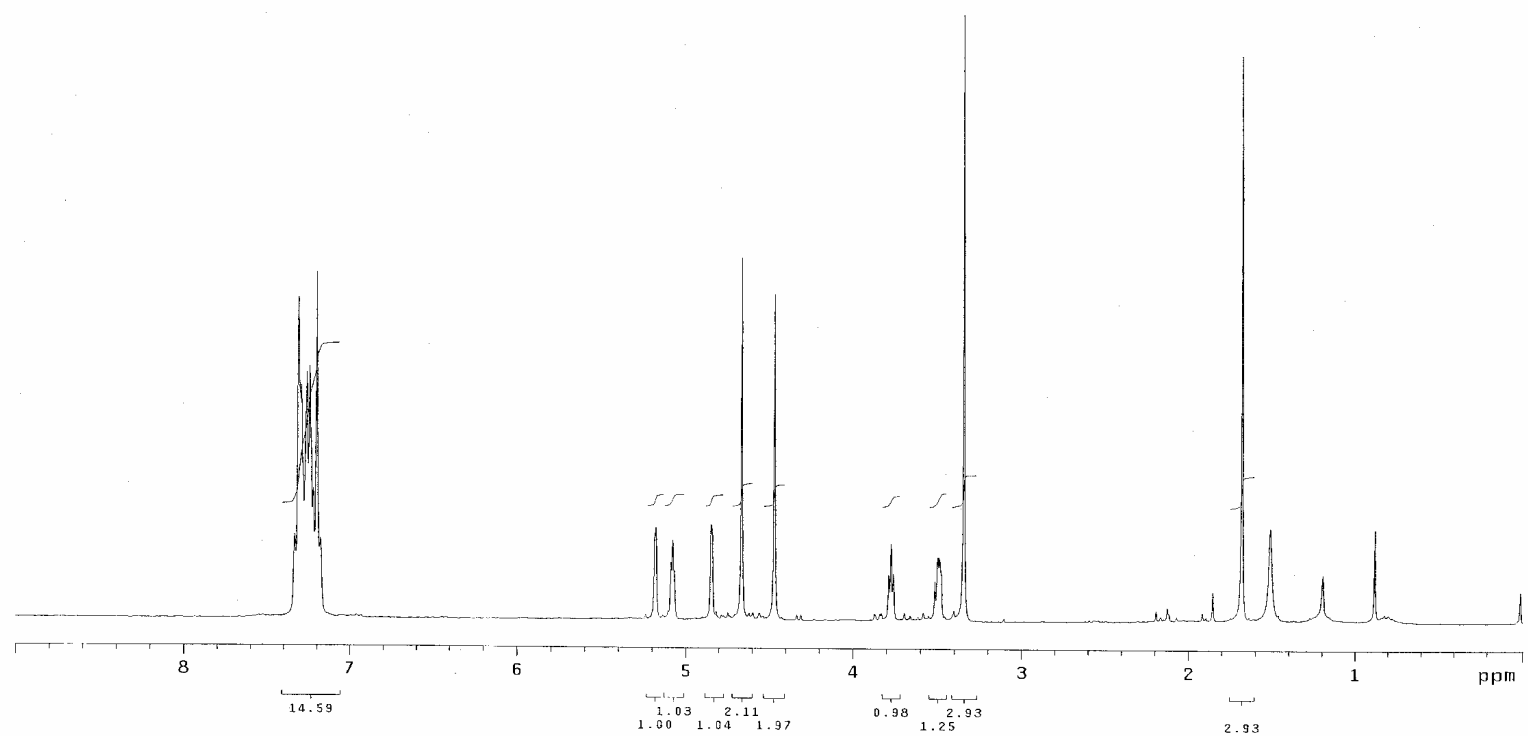

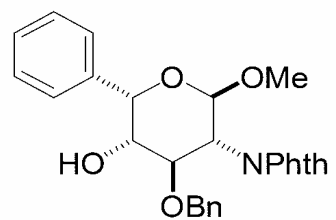

**10d**

$^1\text{H}$  NMR, 300MHz,  $\text{C}_6\text{D}_6$

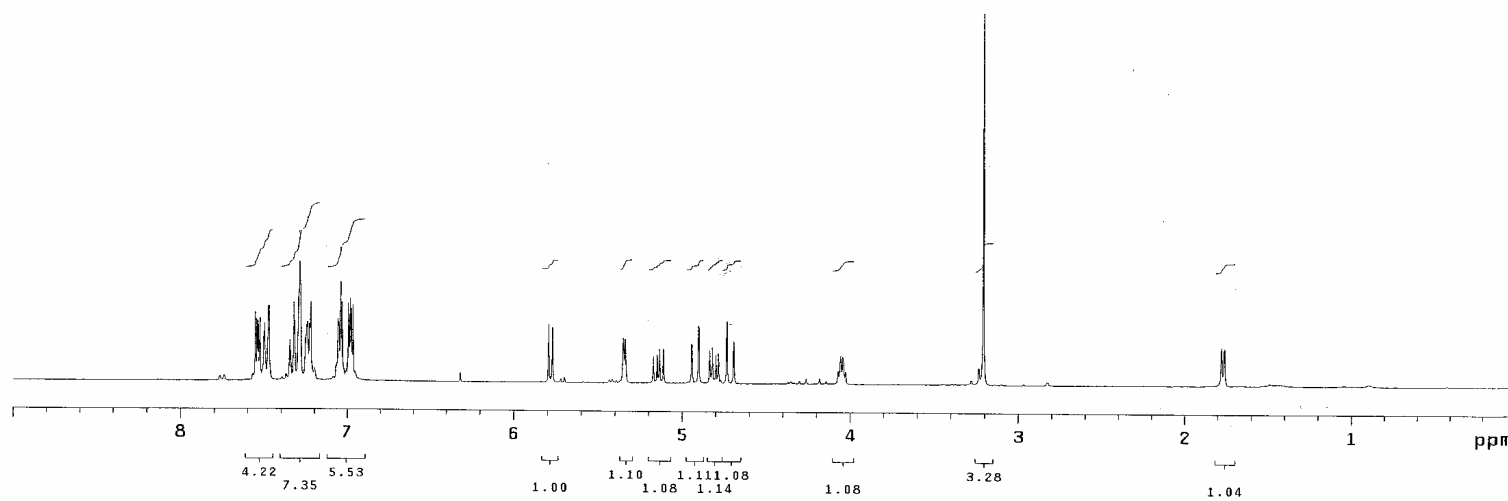

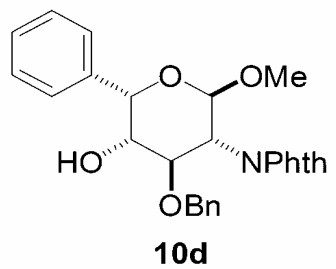

$^{13}\text{C}$  NMR, 75MHz,  $\text{C}_6\text{D}_6$

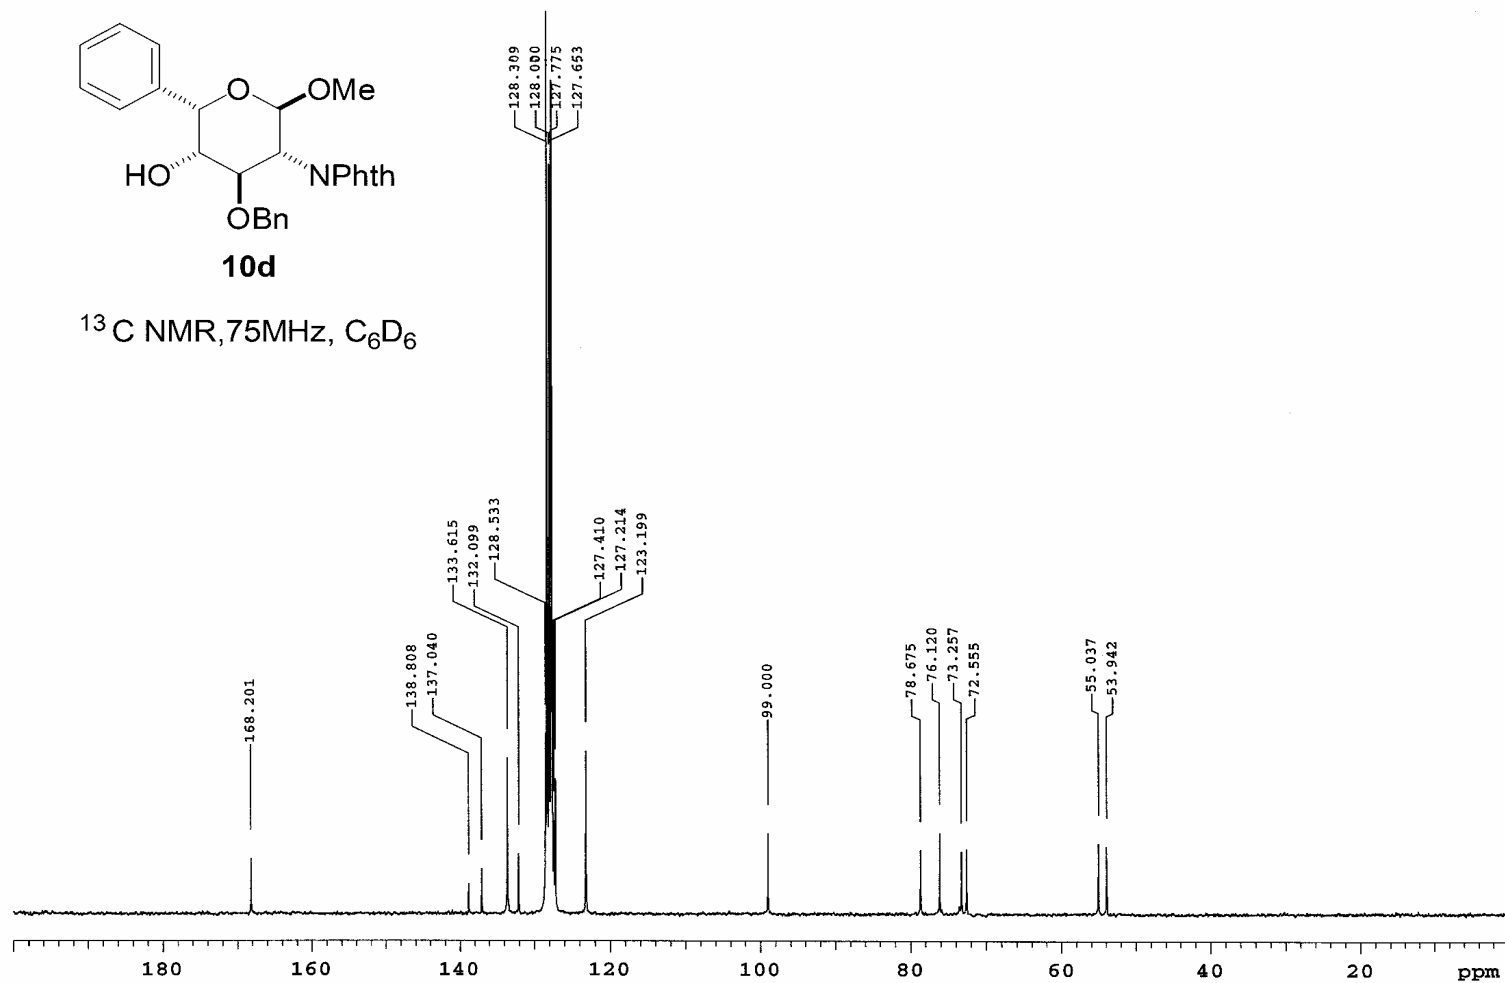



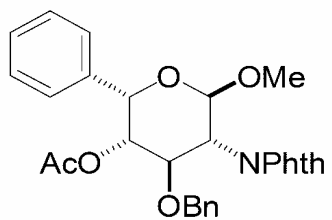

$^1\text{H}$  NMR, 300MHz,  $\text{C}_6\text{D}_6$

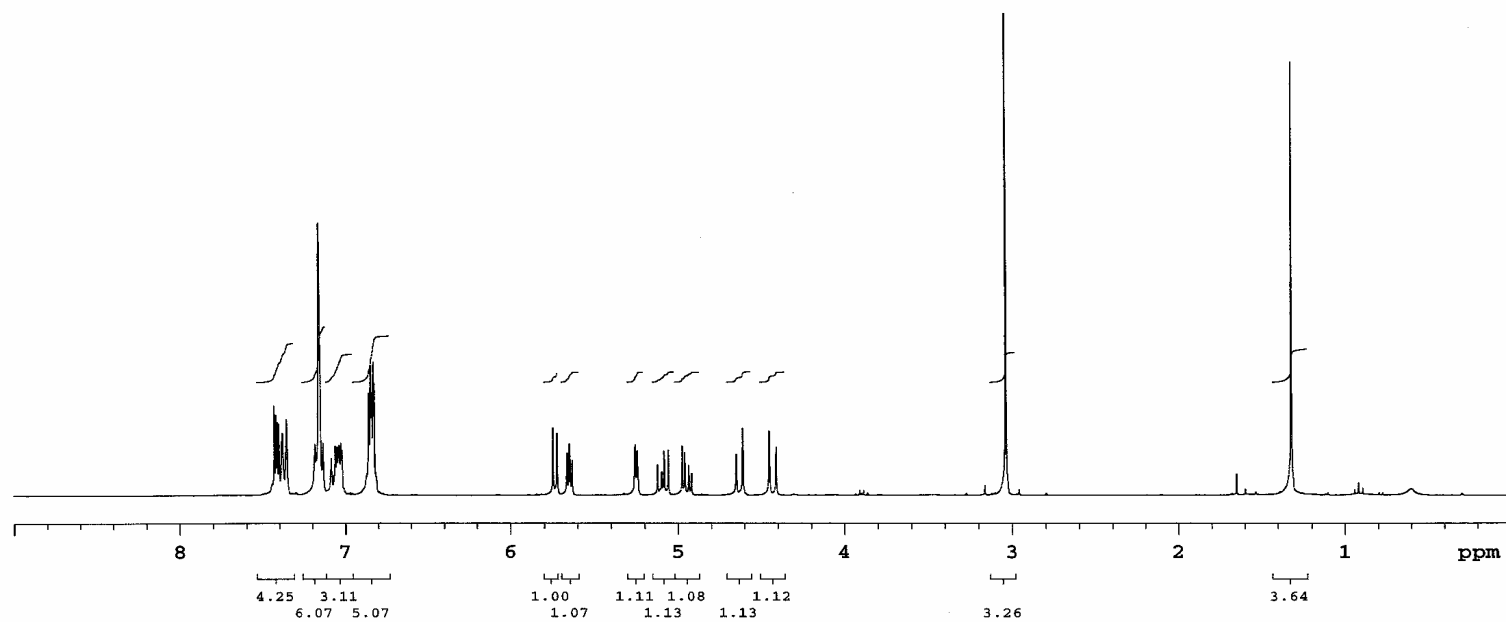

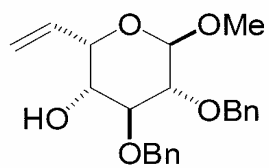

**9e**

<sup>1</sup>H NMR, 300MHz, CDCl<sub>3</sub>

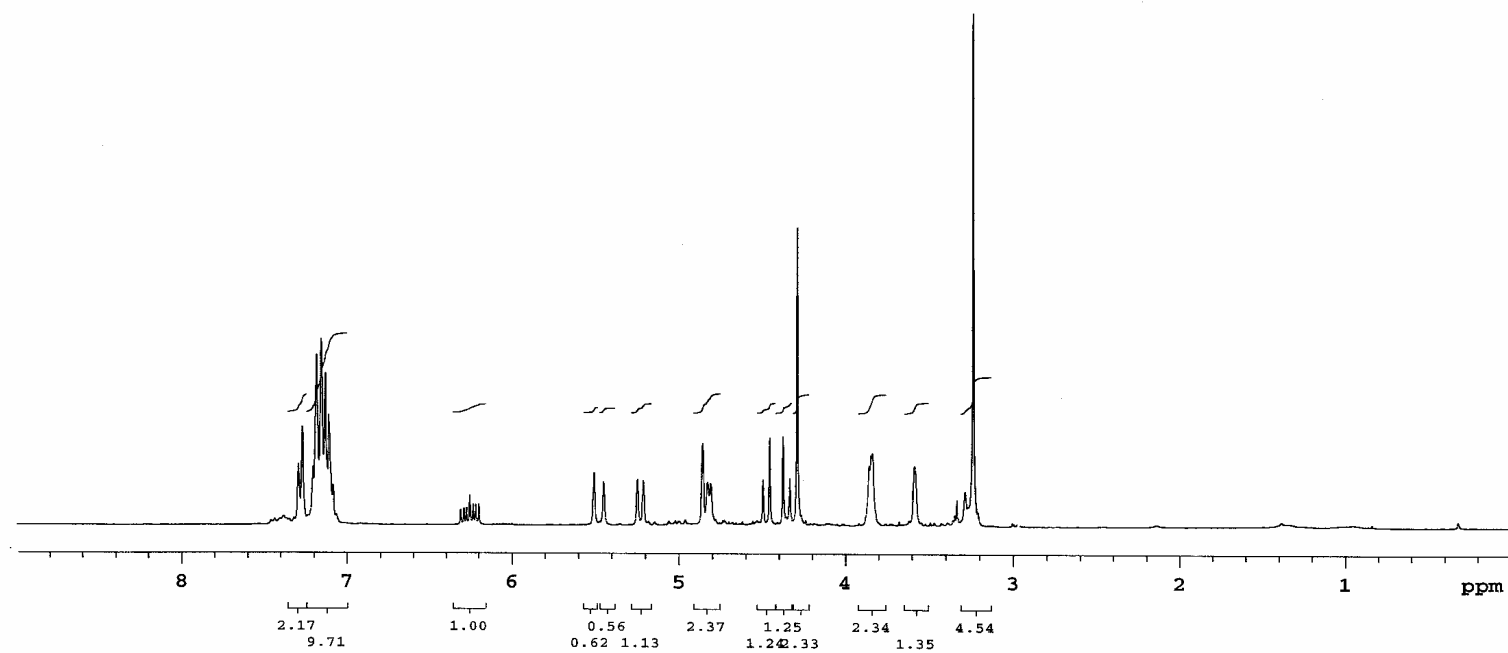

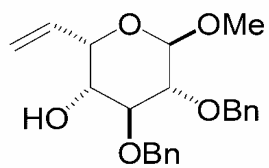

**9e**

$^{13}\text{C}$  NMR, 75MHz,  $\text{C}_6\text{D}_6$

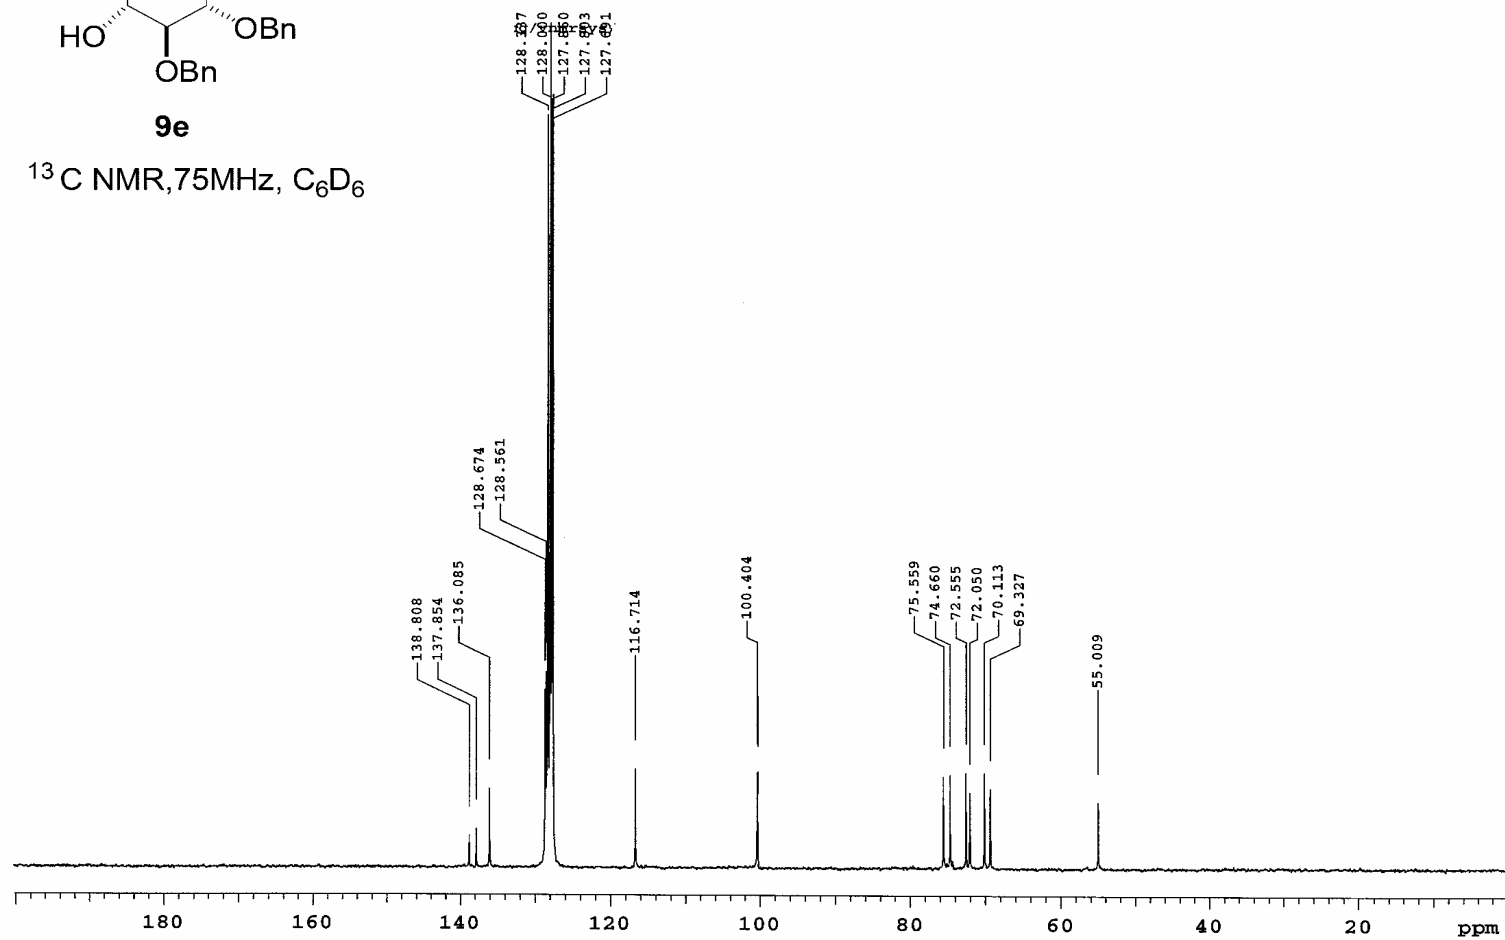

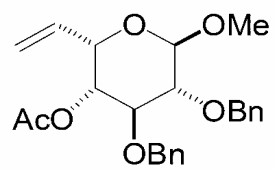

<sup>1</sup>H NMR, 300MHz, CDCl<sub>3</sub>

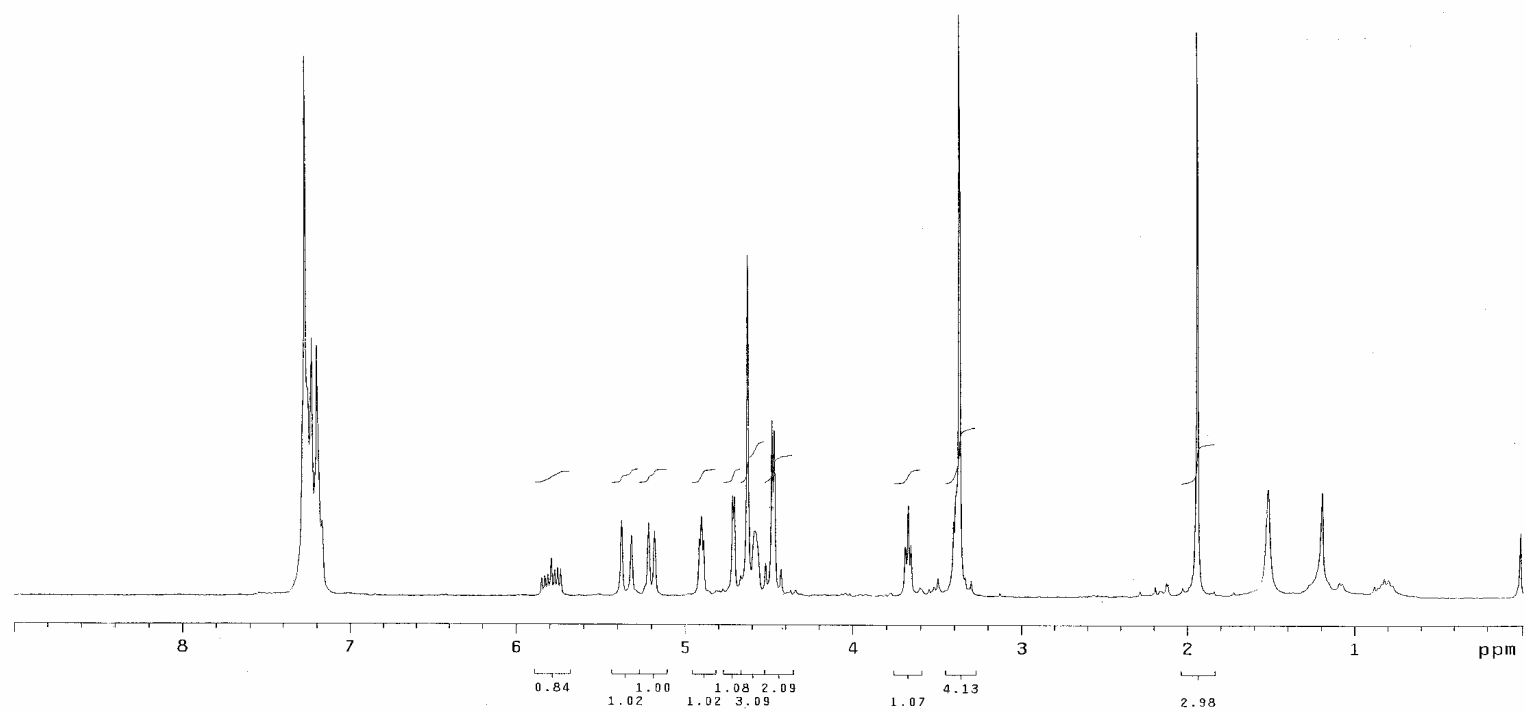

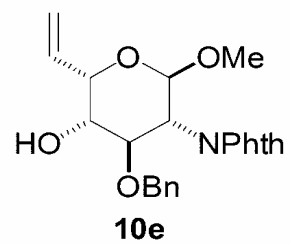

$^1\text{H}$  NMR, 300MHz,  $\text{CDCl}_3$

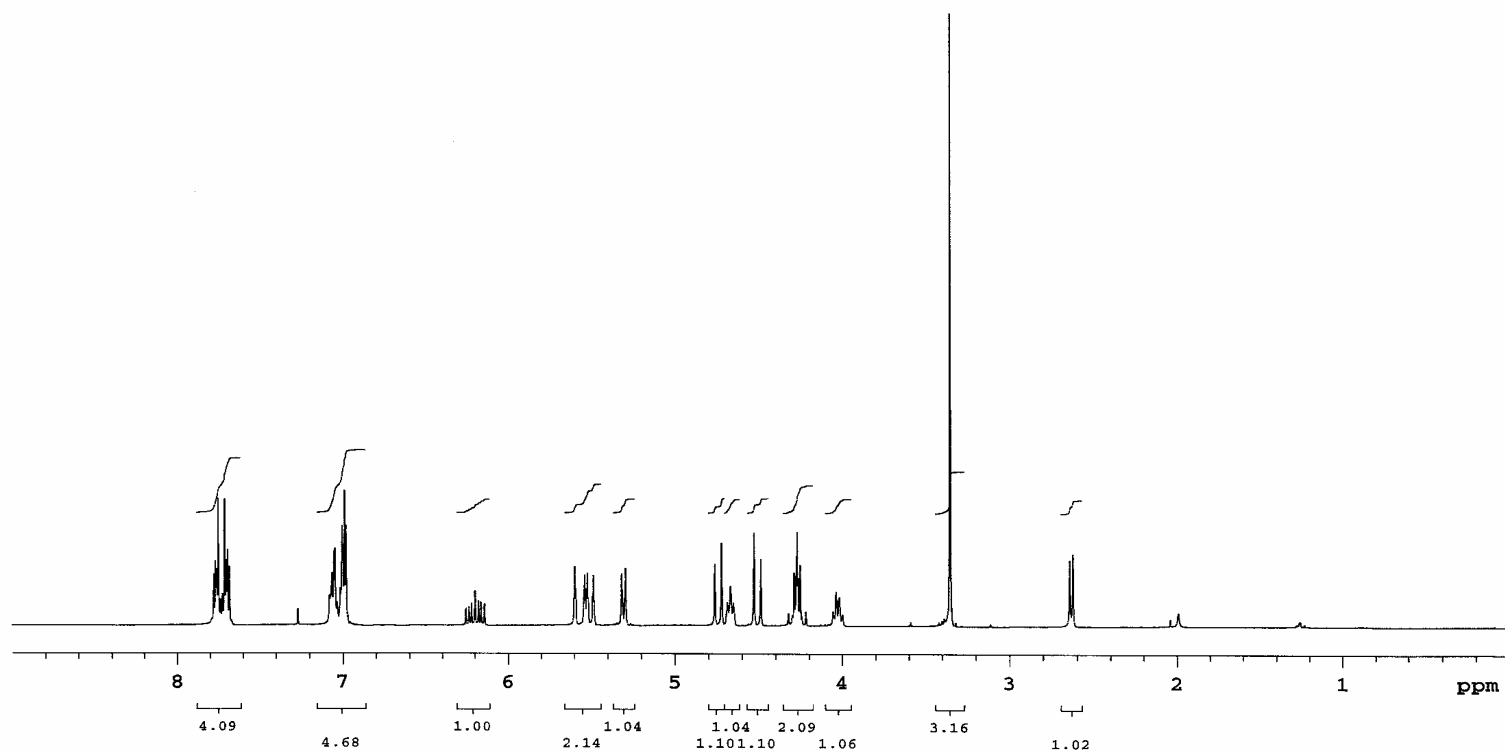

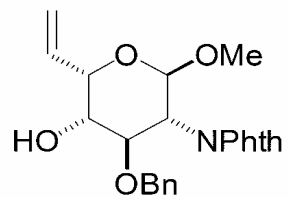

**10e**

<sup>13</sup>C NMR, 75MHz, CDCl<sub>3</sub>

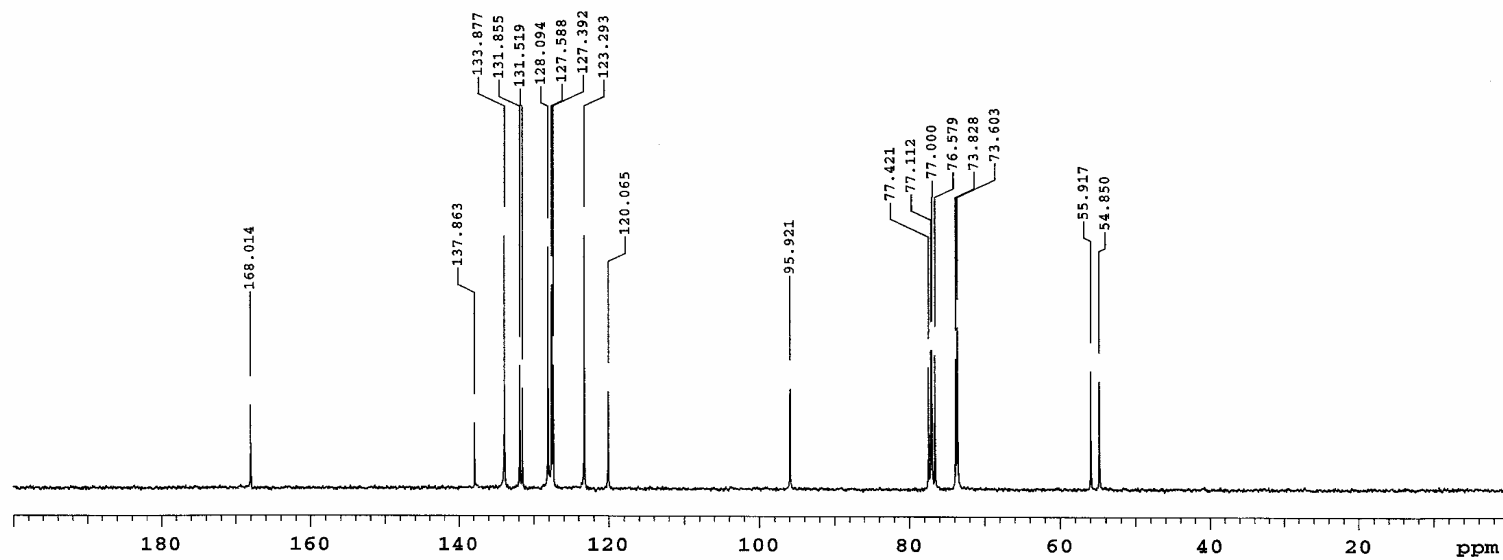

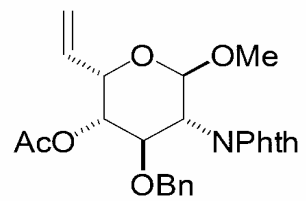

<sup>1</sup>H NMR, 300MHz, CDCl<sub>3</sub>

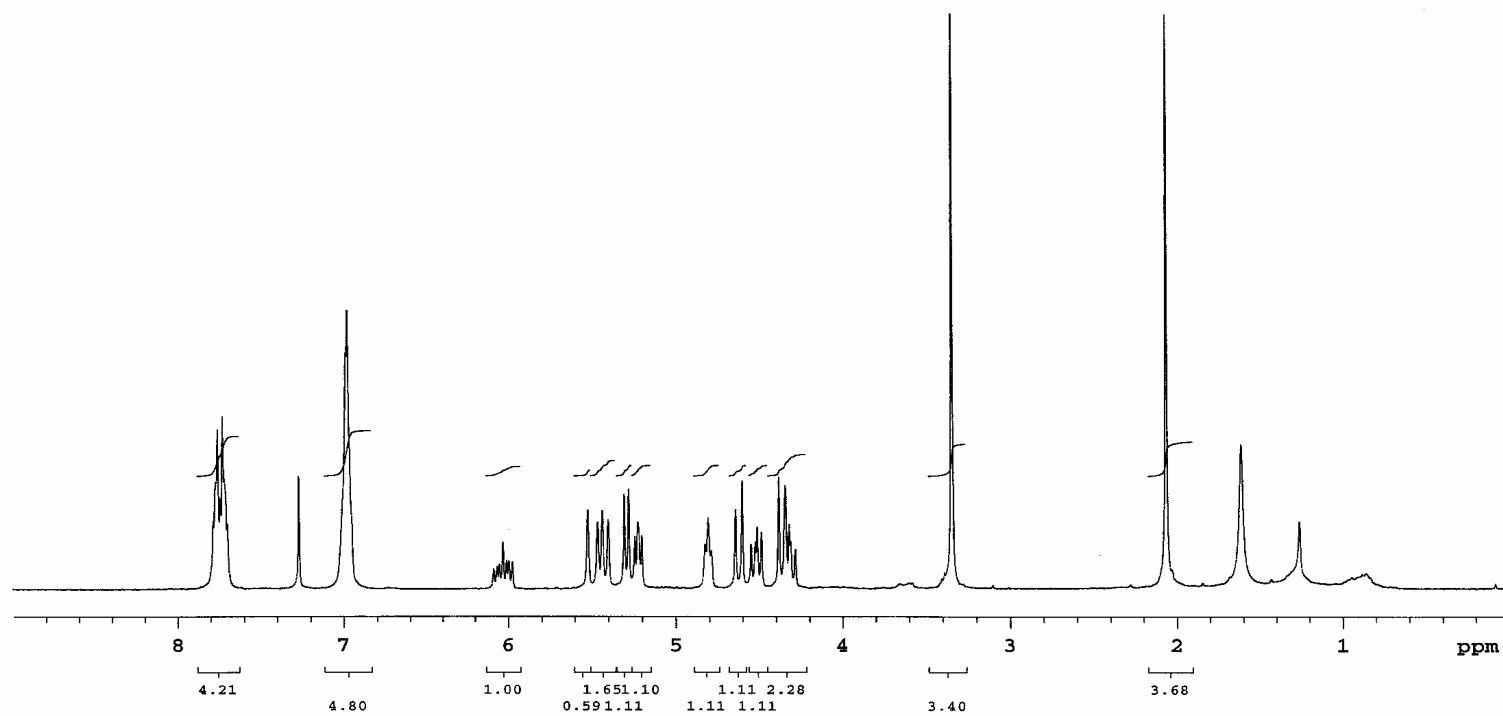

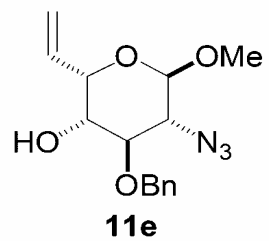

$^1\text{H}$  NMR, 300MHz,  $\text{CDCl}_3$

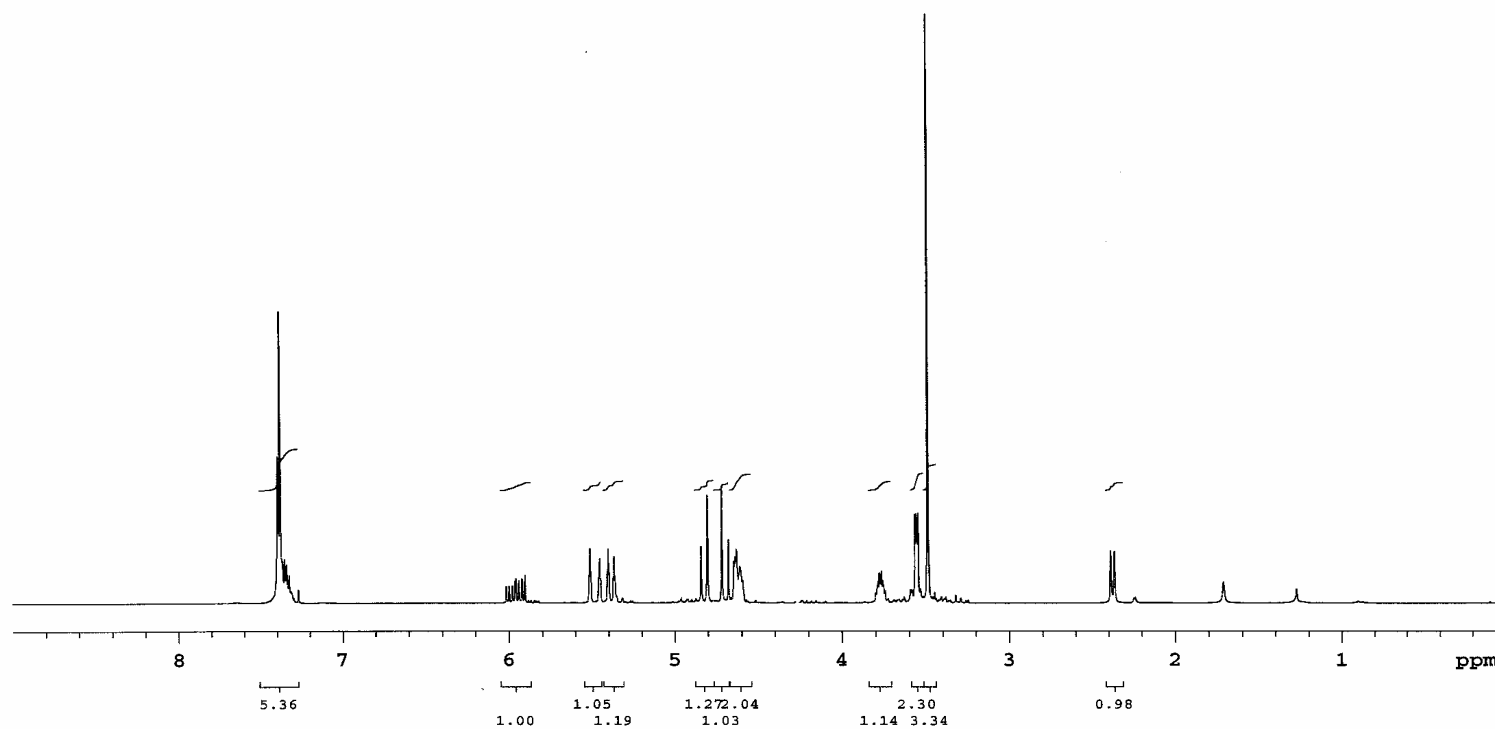



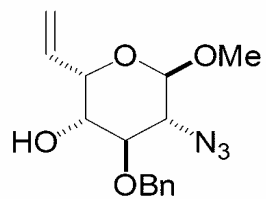

**11e**

$^{13}\text{C}$  NMR, 75MHz,  $\text{CDCl}_3$

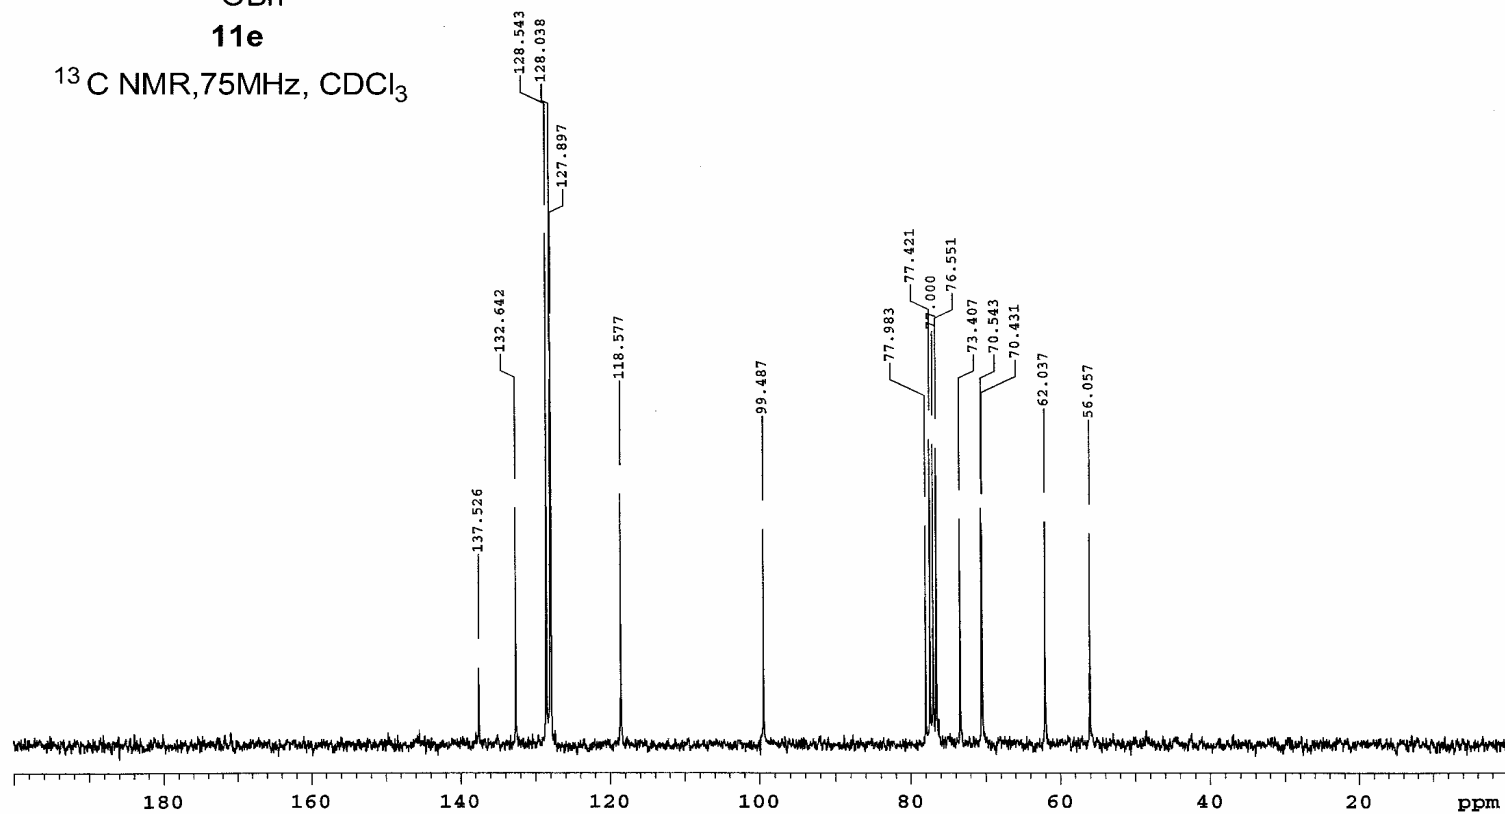

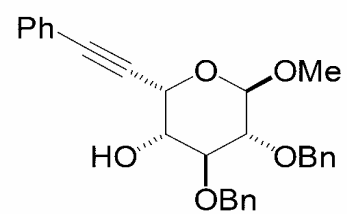

**9f**

$^1\text{H}$  NMR, 300MHz,  $\text{C}_6\text{D}_6$

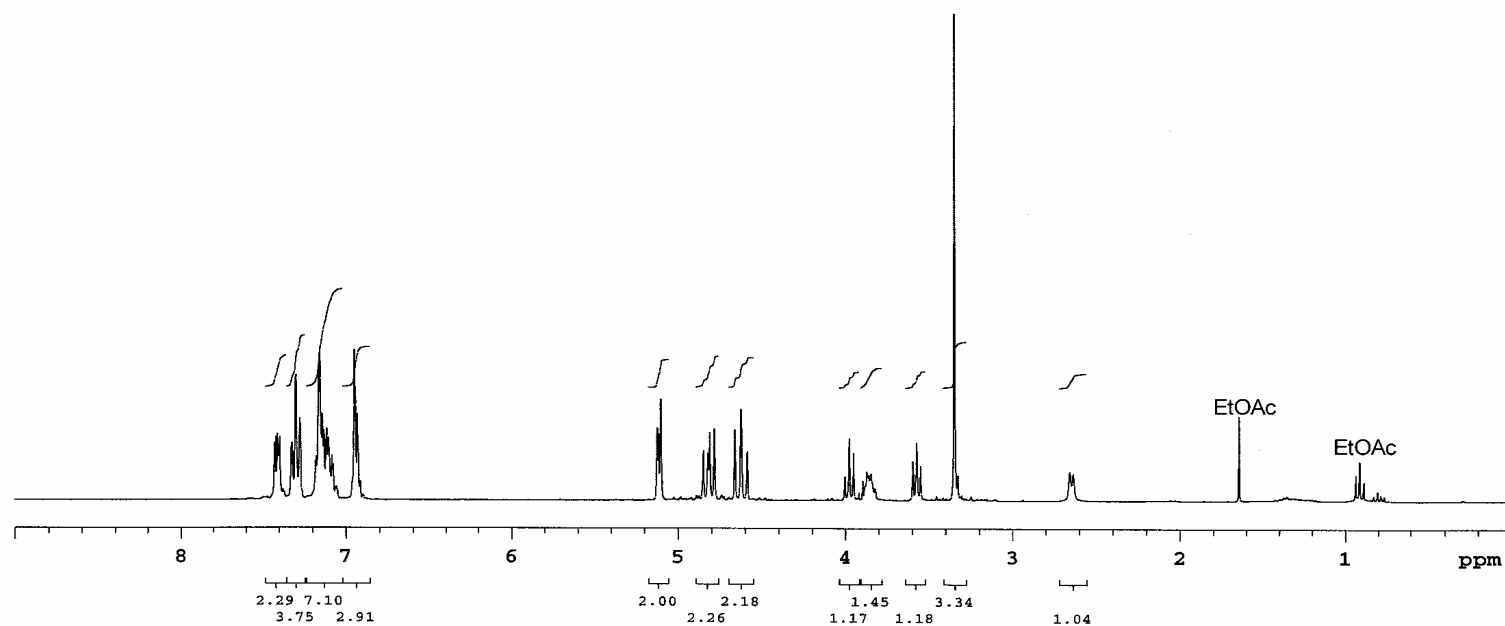

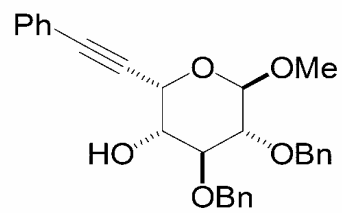

**9f**

$^{13}\text{C}$  NMR, 75MHz,  $\text{C}_6\text{D}_6$

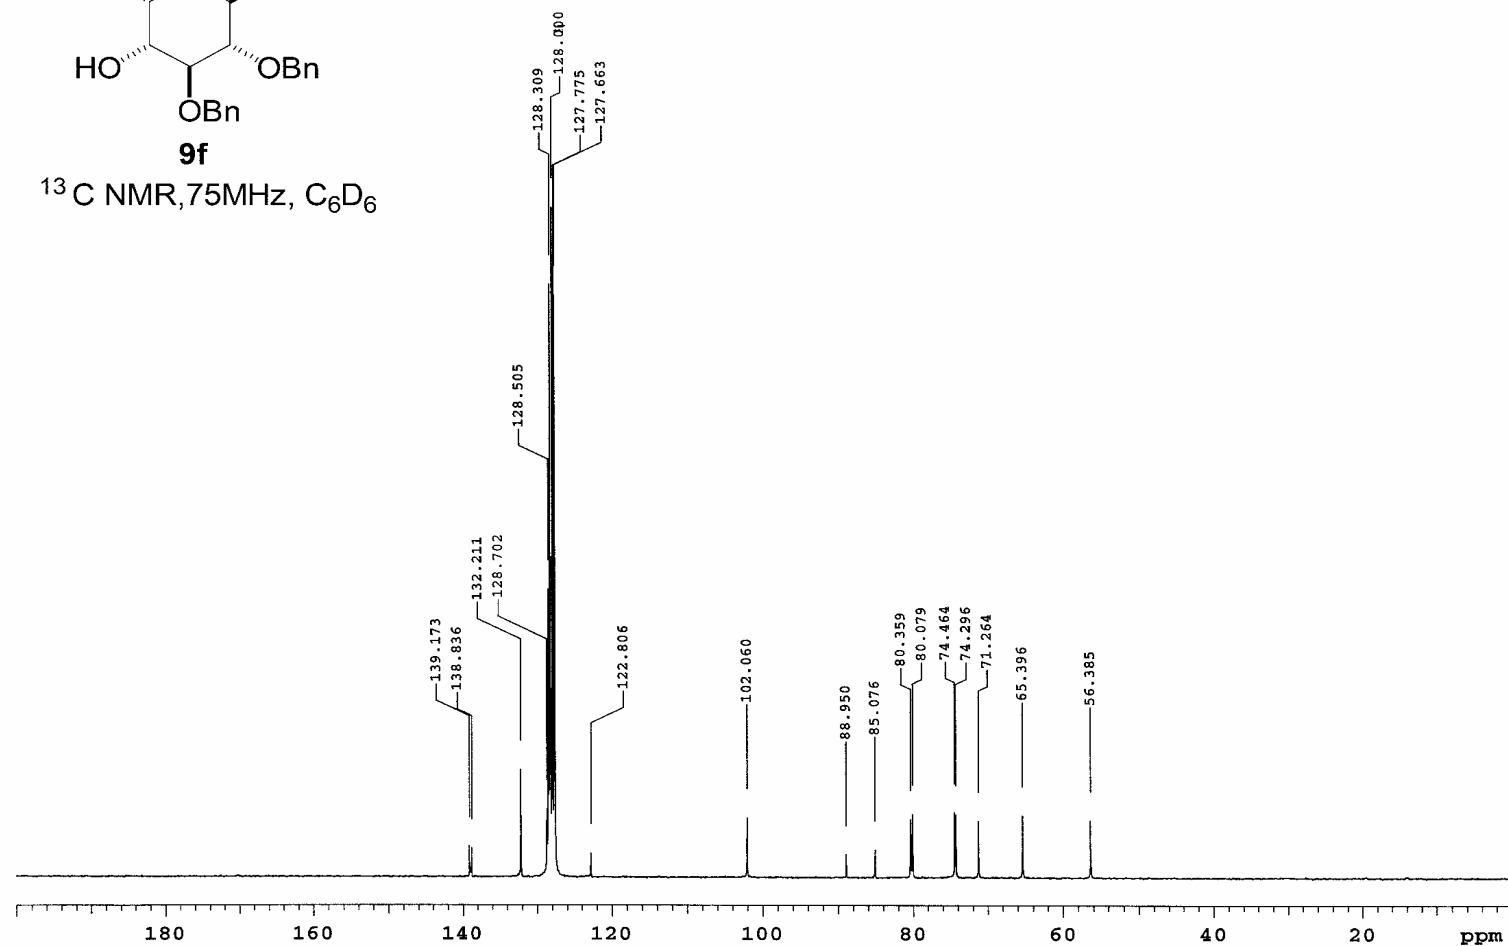

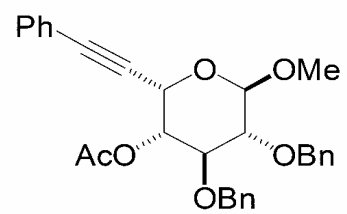

$^1\text{H}$  NMR, 300MHz,  $\text{C}_6\text{D}_6$

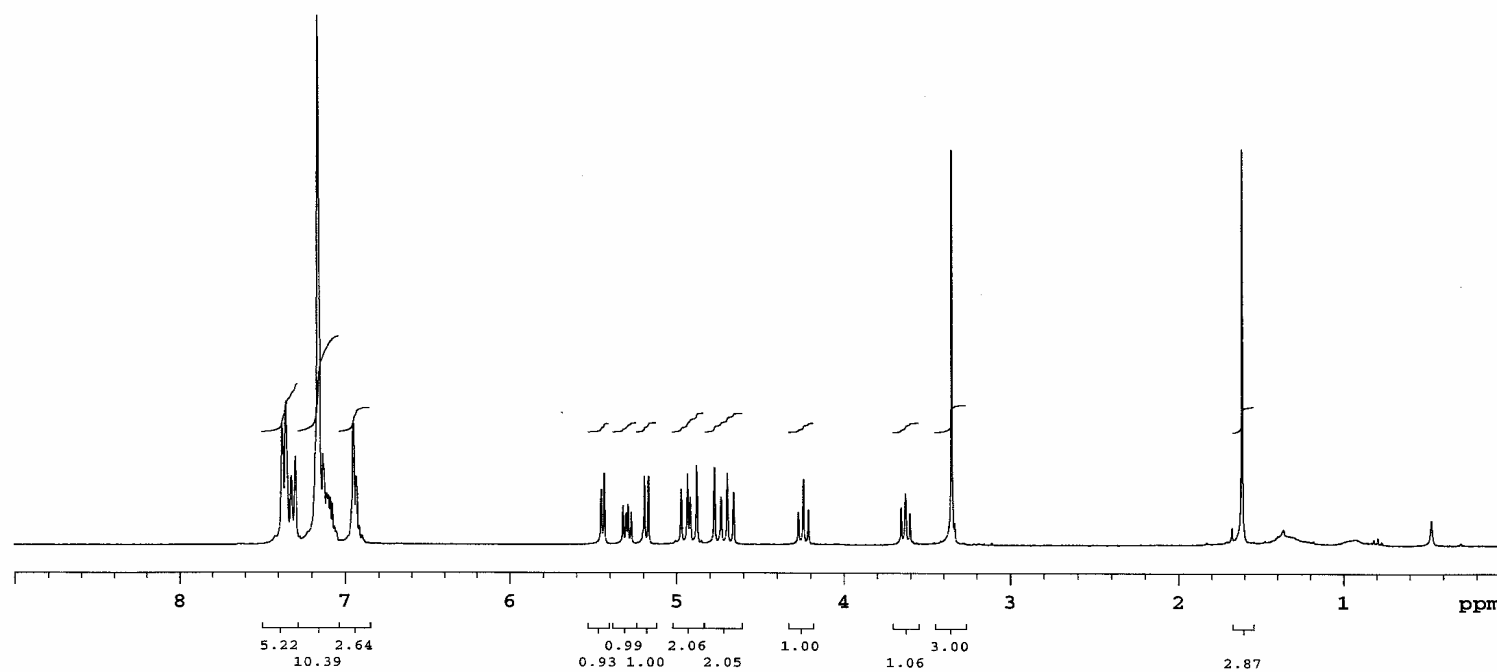

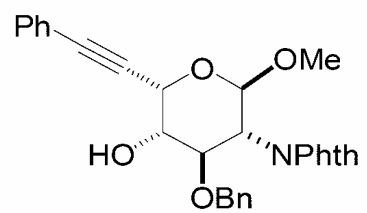

**10f**

$^1\text{H}$  NMR, 300MHz,  $\text{C}_6\text{D}_6$

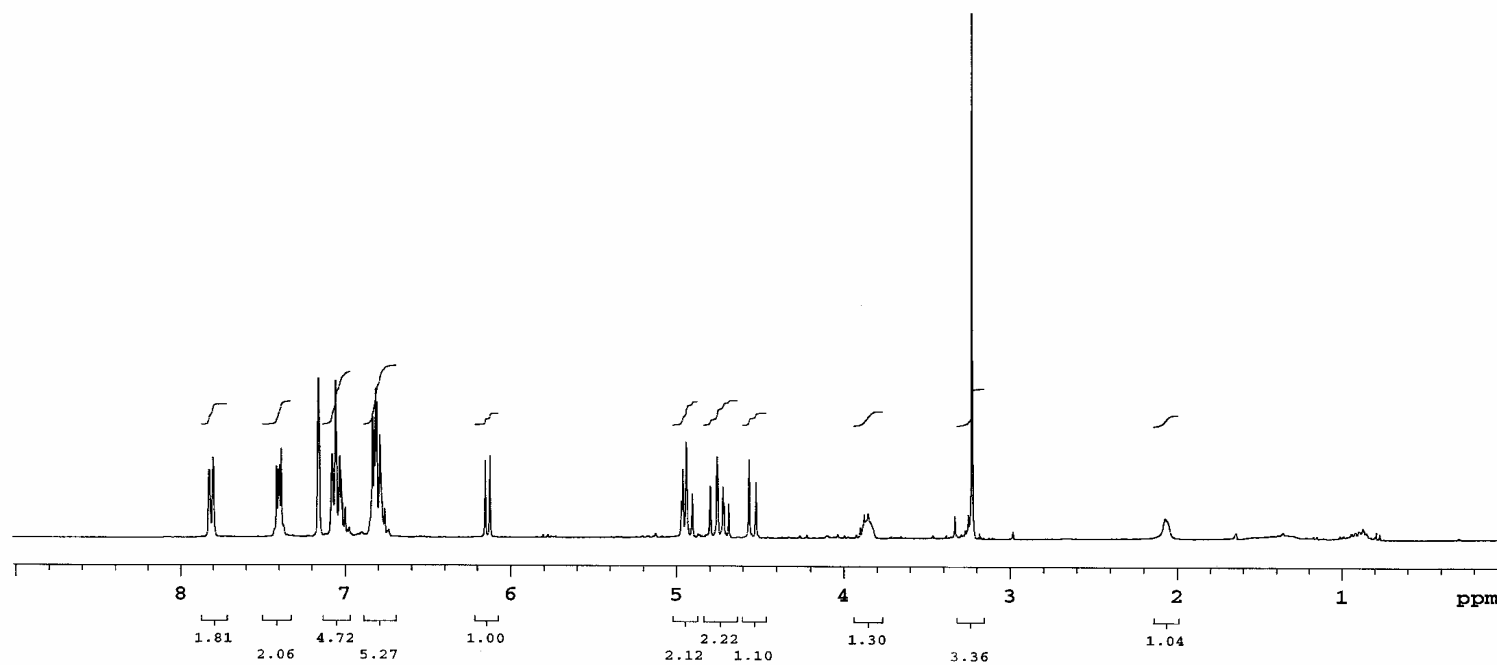

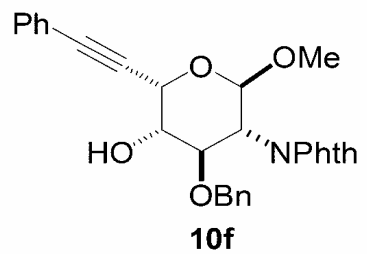

**10f**  
 $^{13}\text{C}$  NMR, 75MHz,  $\text{C}_6\text{D}_6$

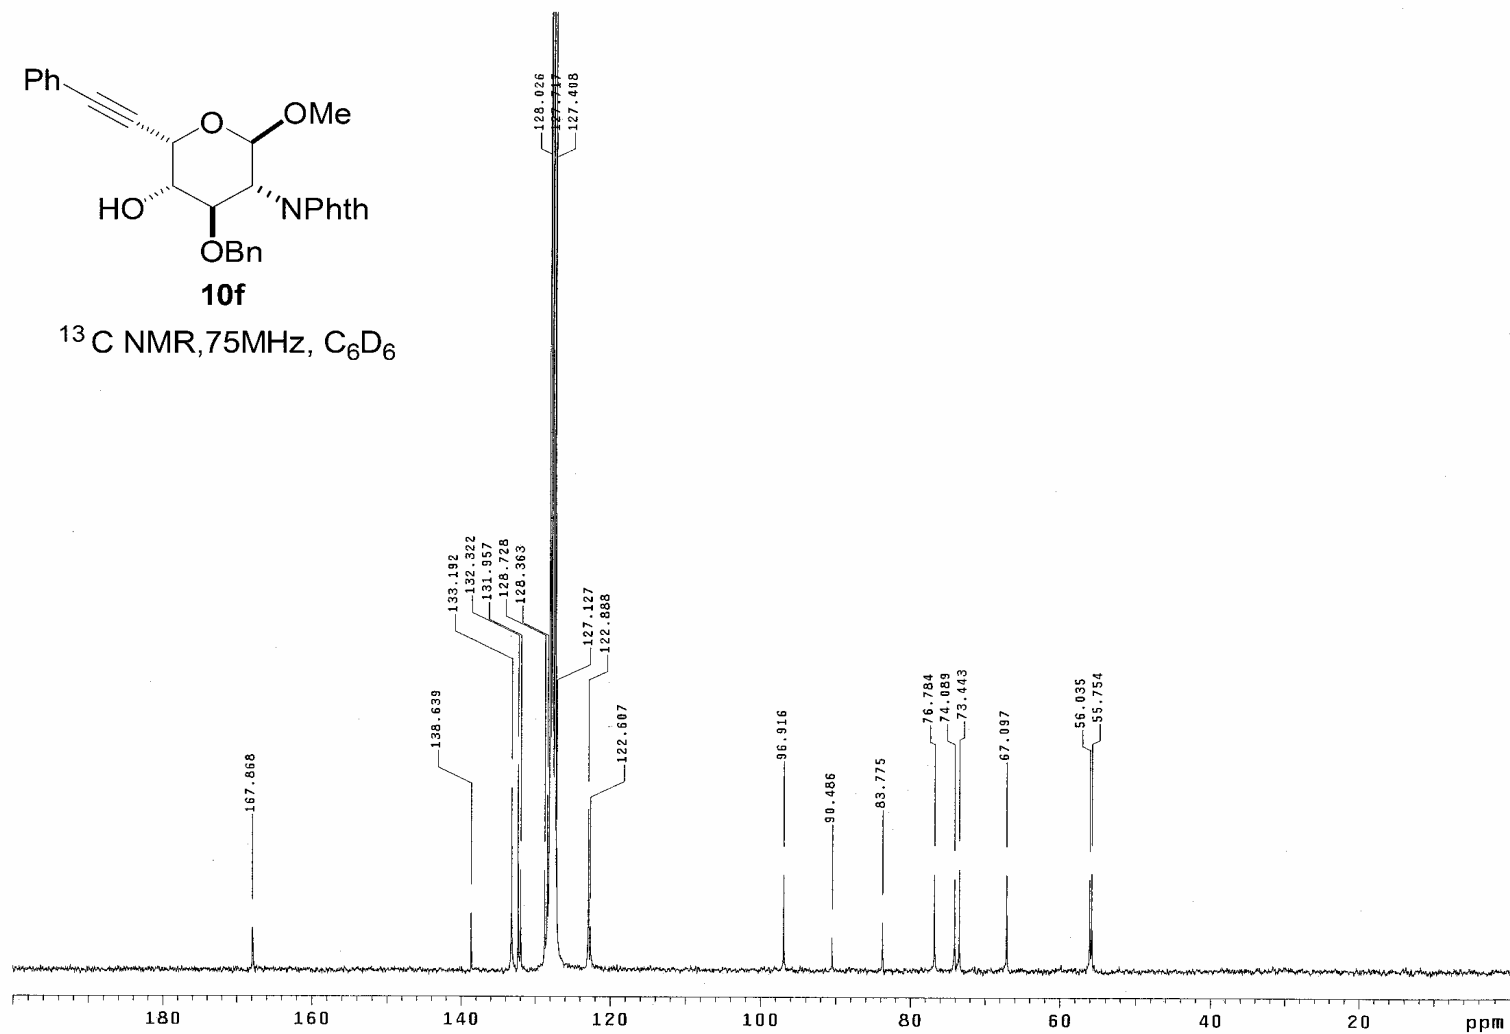

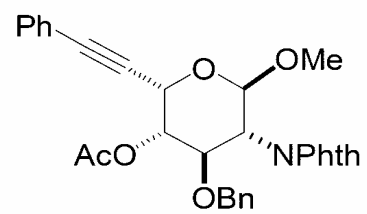

$^1\text{H}$  NMR, 300MHz,  $\text{C}_6\text{D}_6$

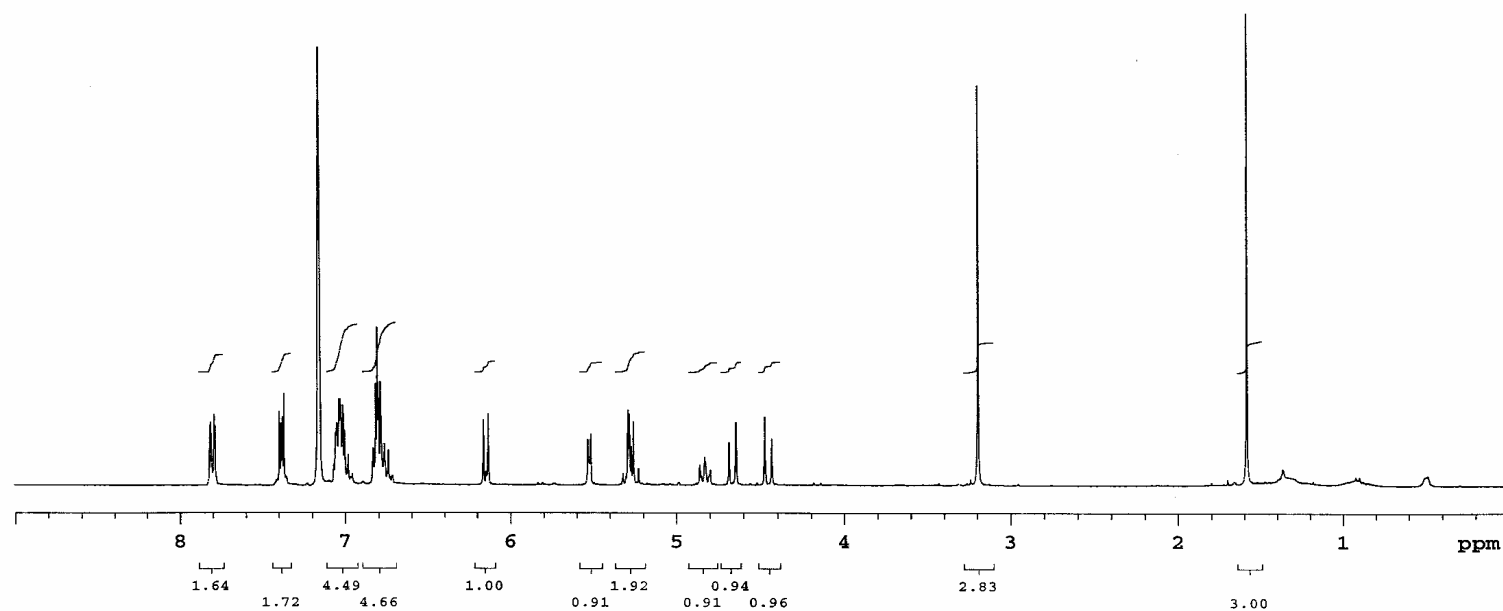

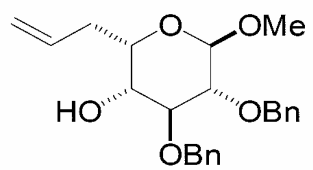

**9g**

<sup>1</sup>H NMR, 300MHz, CDCl<sub>3</sub>

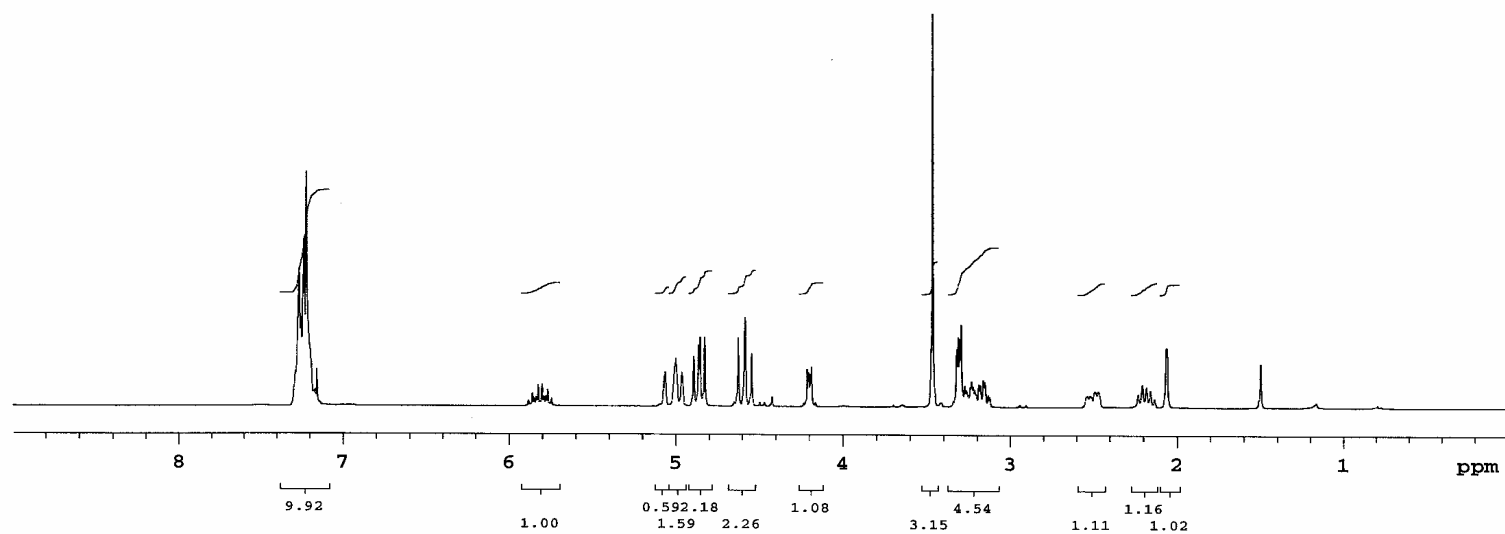



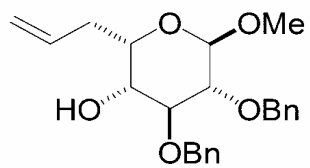

**9g**

<sup>13</sup>C NMR, 75MHz, CDCl<sub>3</sub>

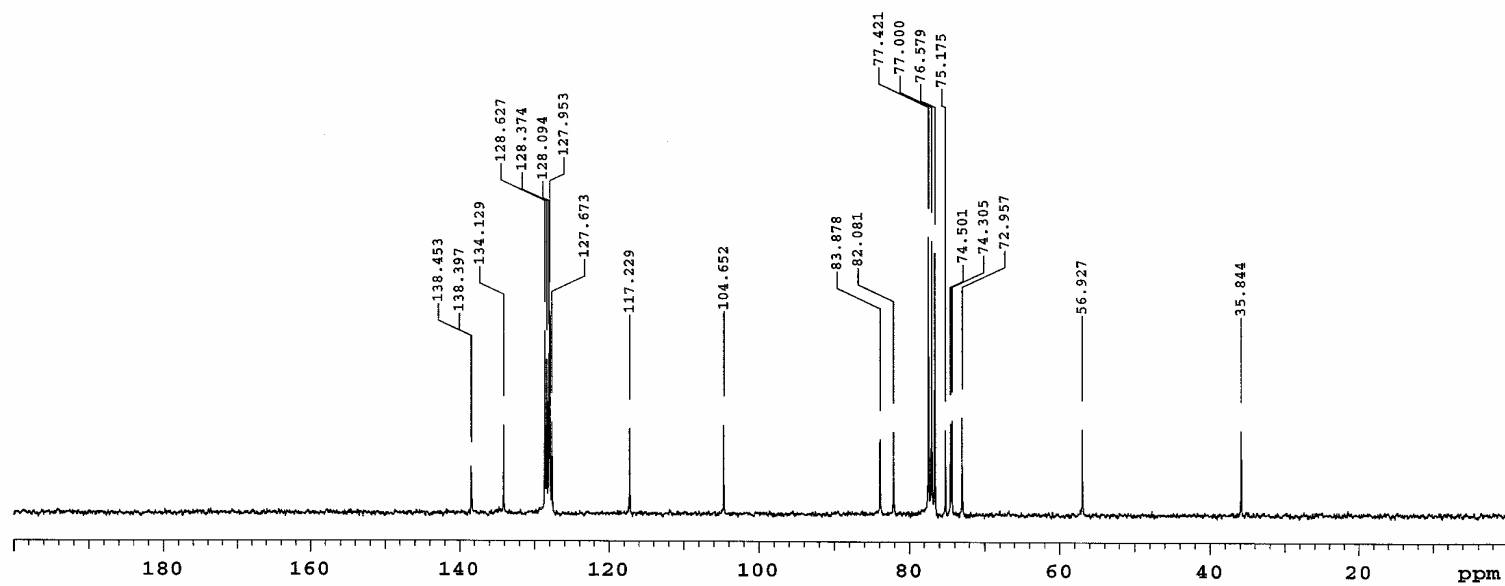

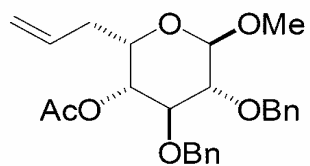

<sup>1</sup>H NMR, 300MHz, CDCl<sub>3</sub>

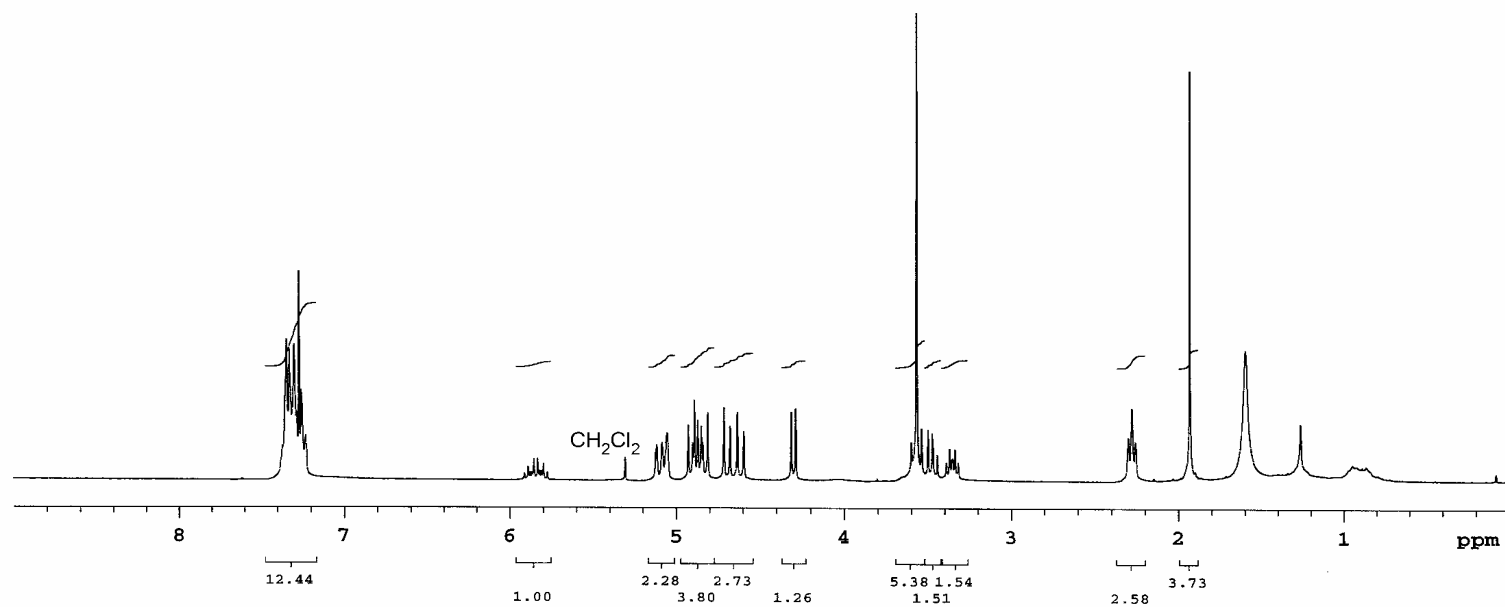

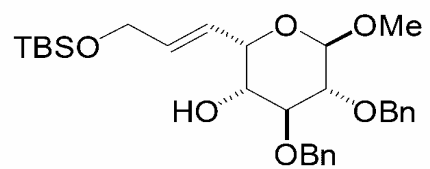

**9h**

<sup>1</sup>H NMR, 300MHz, CDCl<sub>3</sub>

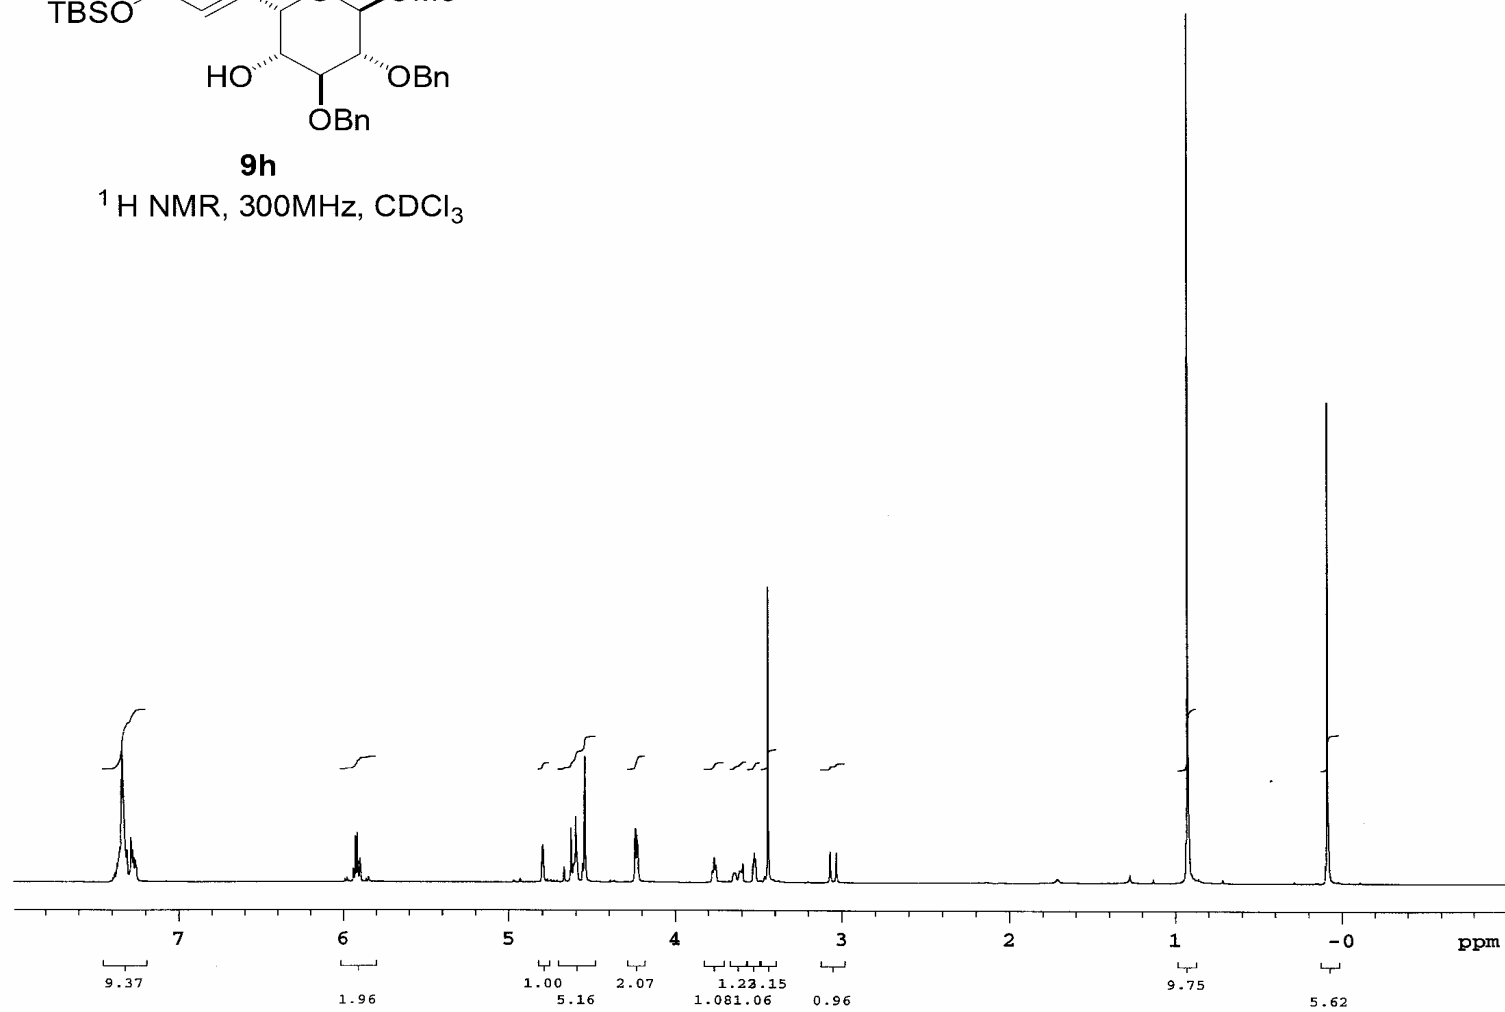

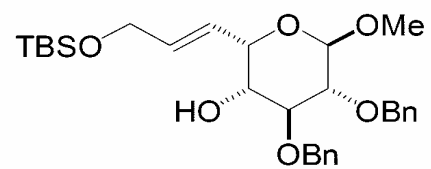

**9h**

$^{13}\text{C}$  NMR, 75MHz,  $\text{CDCl}_3$

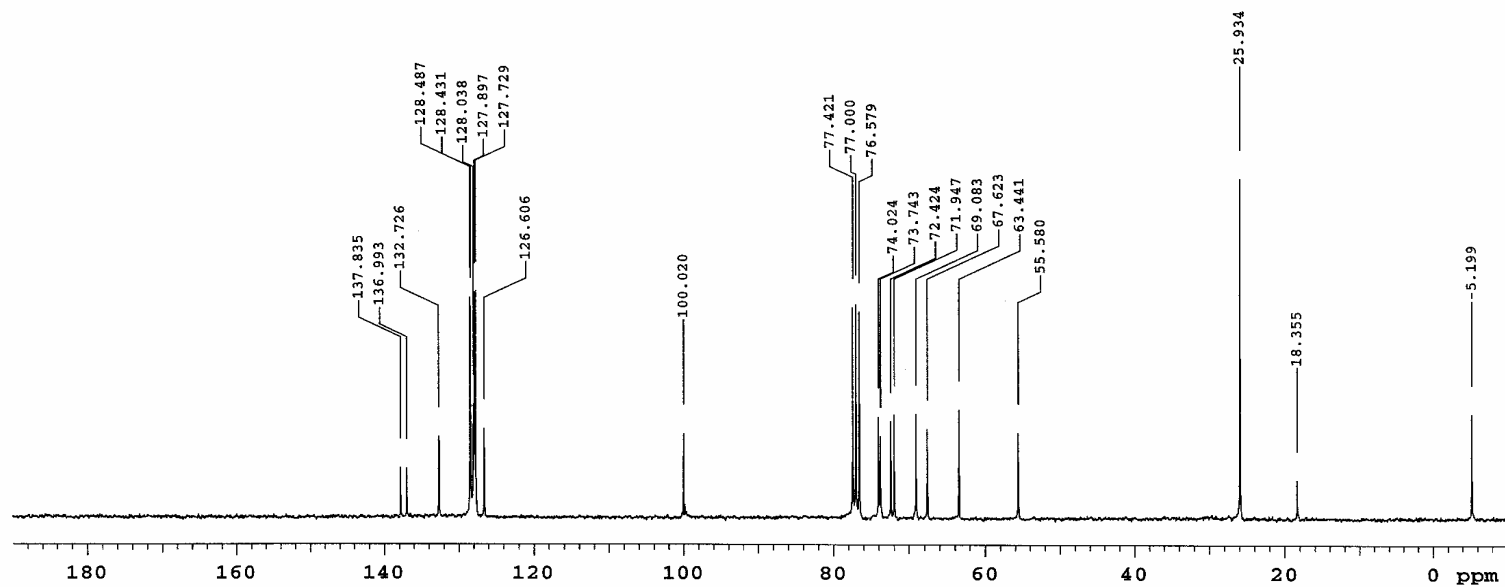

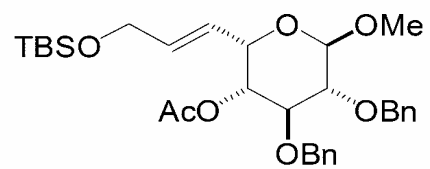

$^1\text{H}$  NMR, 300MHz,  $\text{CDCl}_3$

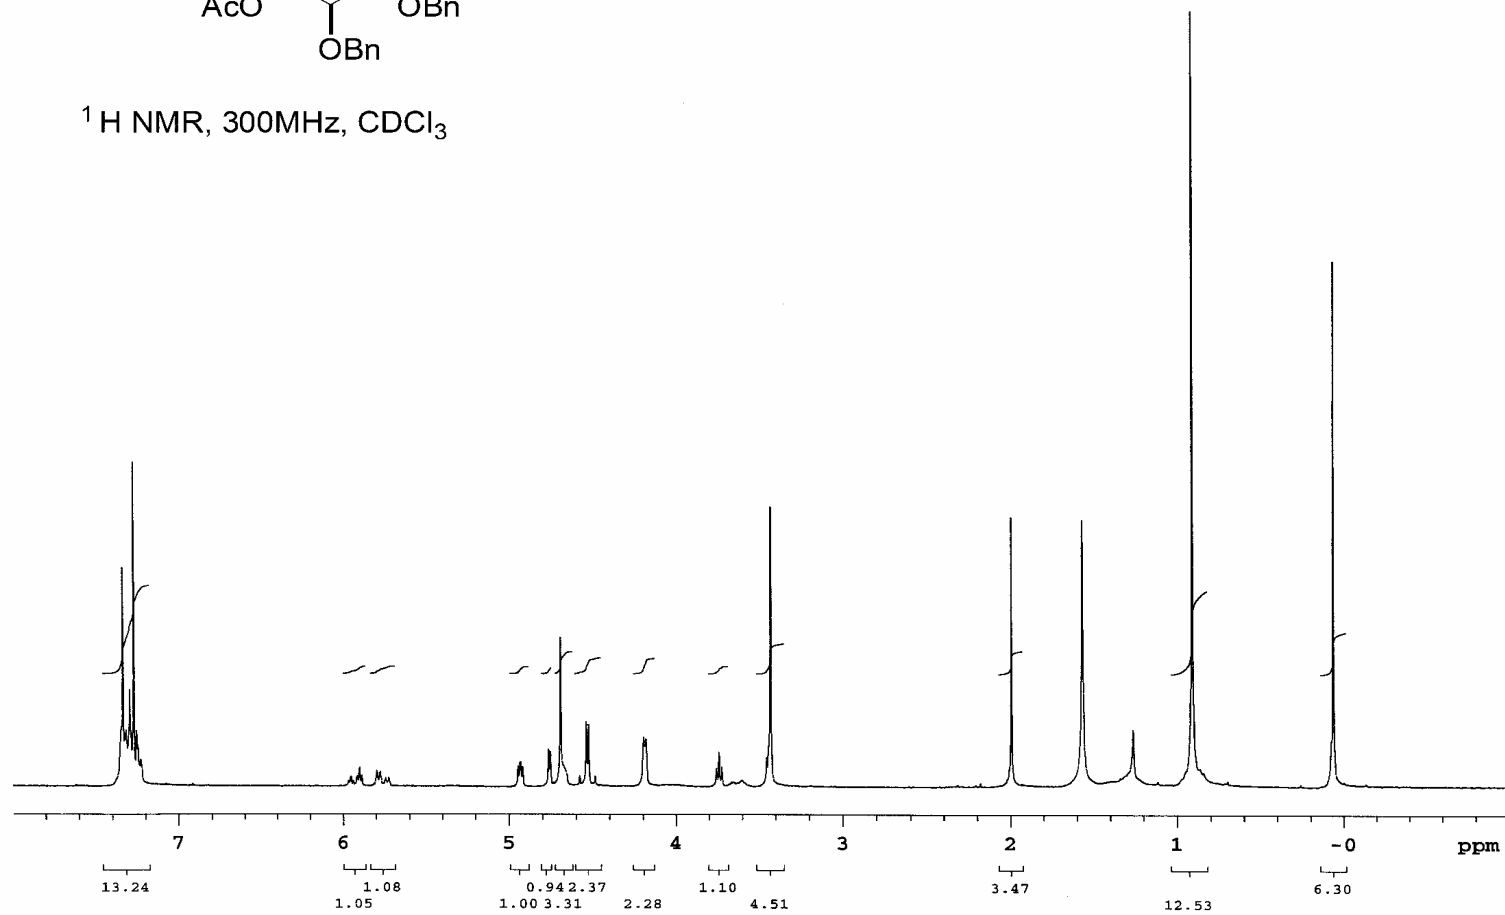

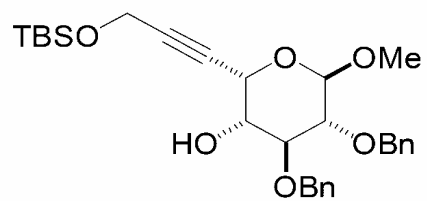

**9i**

$^1\text{H}$  NMR, 300MHz,  $\text{CDCl}_3$

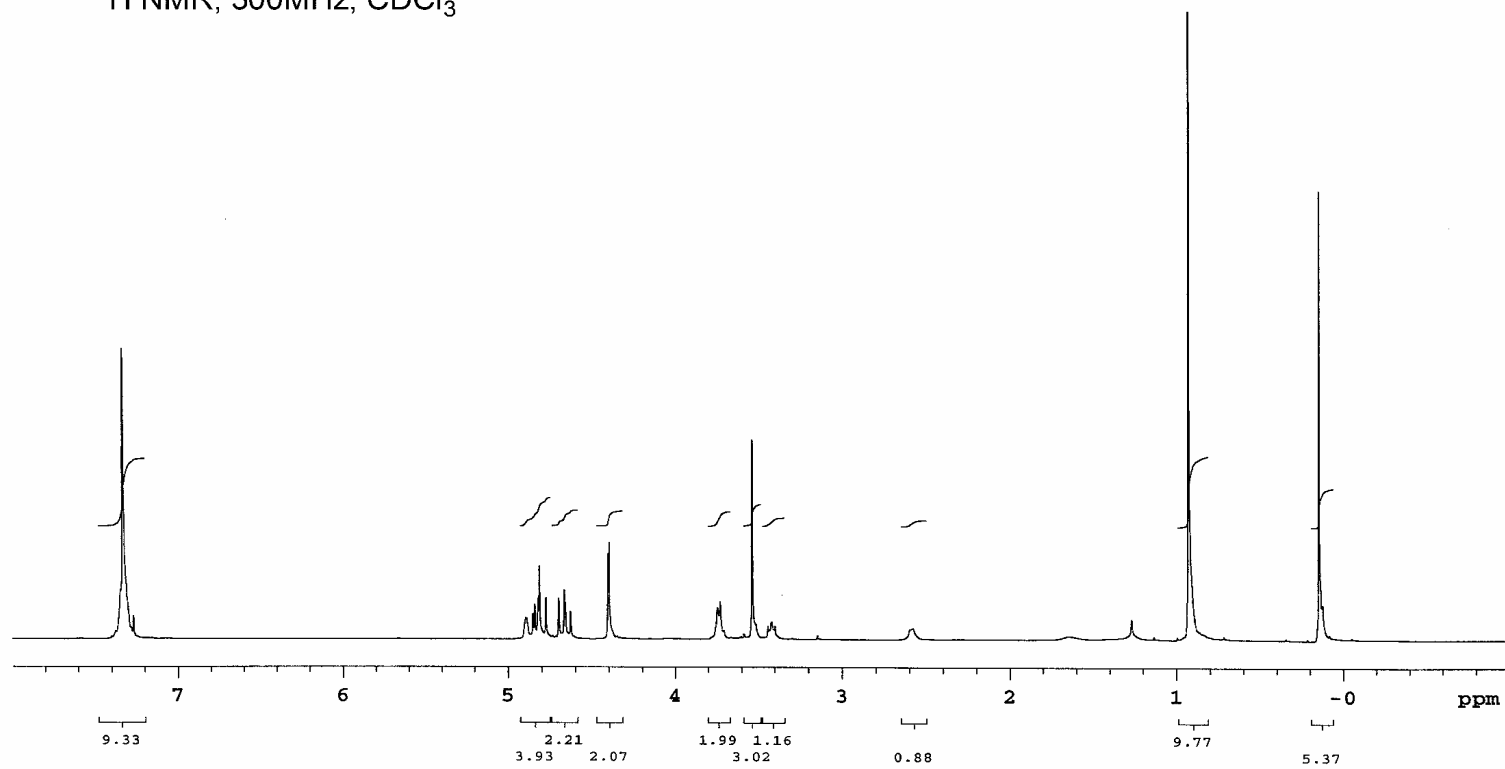

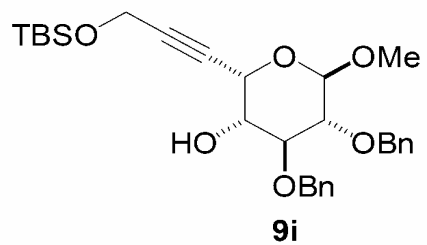

$^{13}\text{C}$  NMR, 75MHz,  $\text{CDCl}_3$

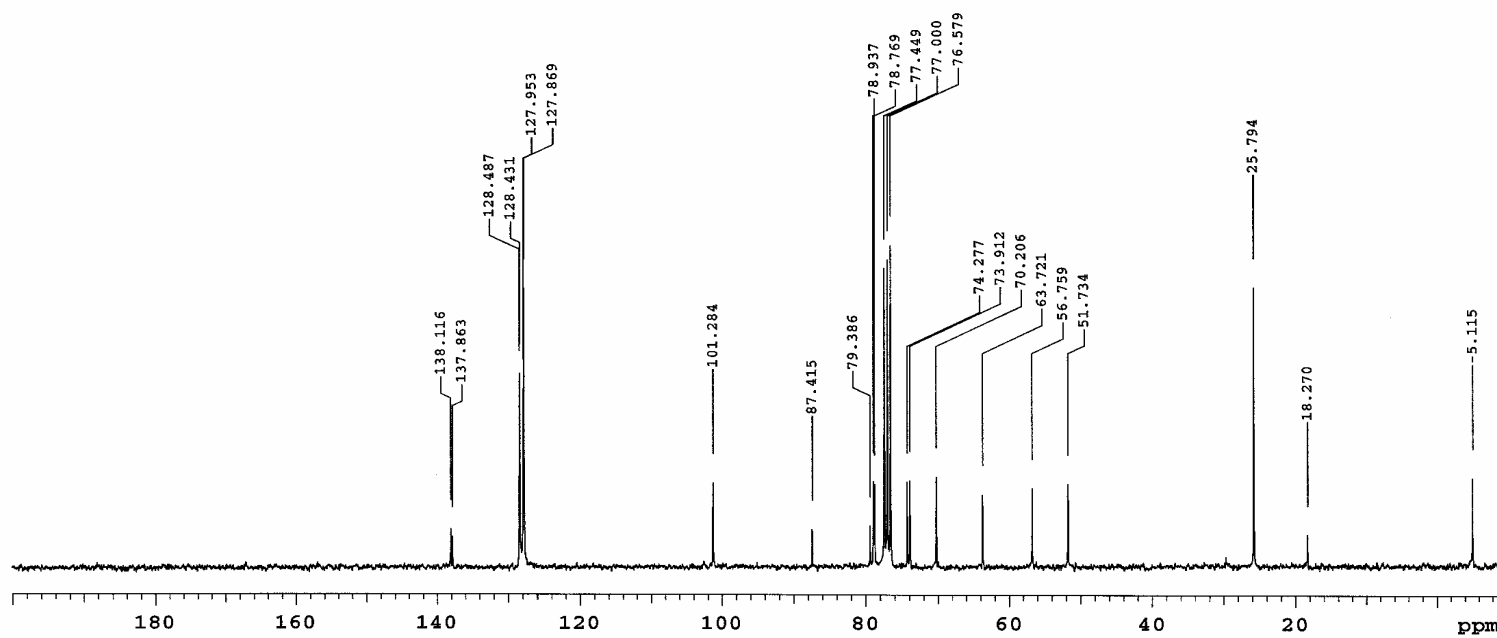

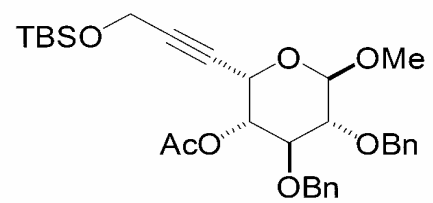

$^1\text{H}$  NMR, 300MHz,  $\text{CDCl}_3$

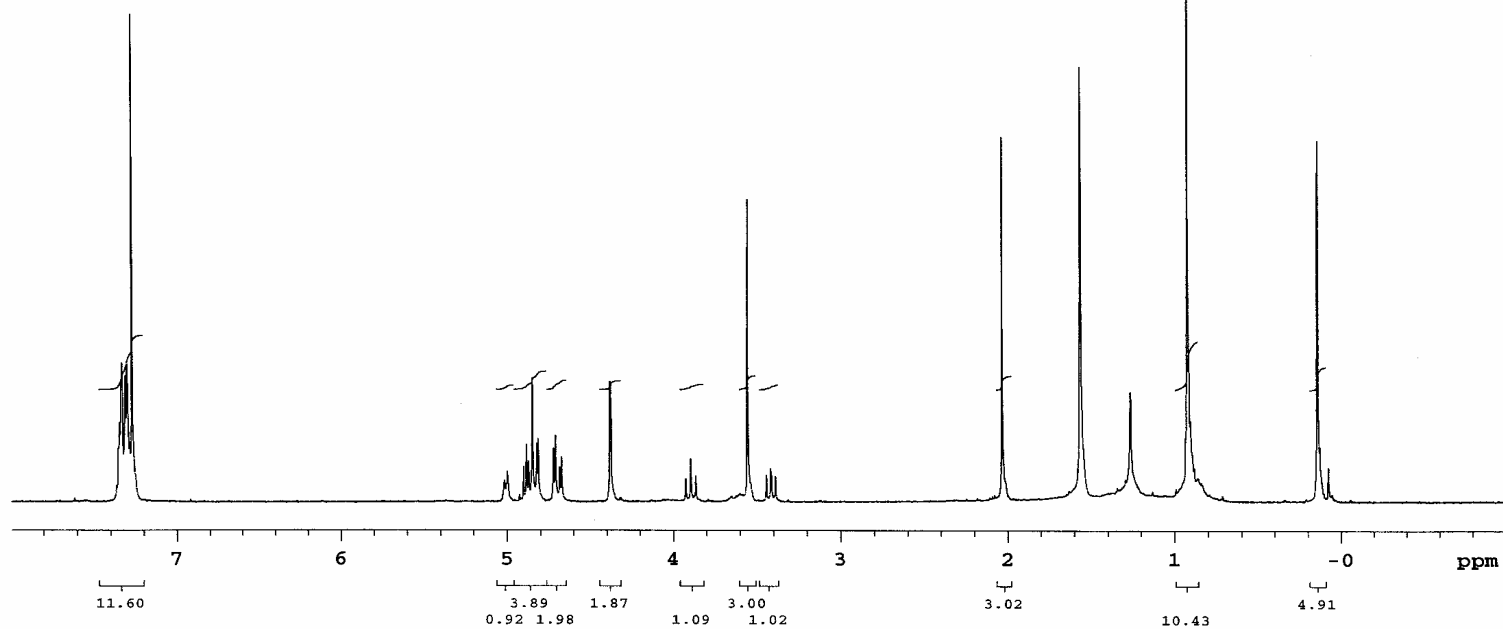



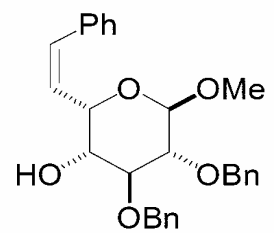

**9j**

$^1\text{H}$  NMR, 300MHz,  $\text{CDCl}_3$

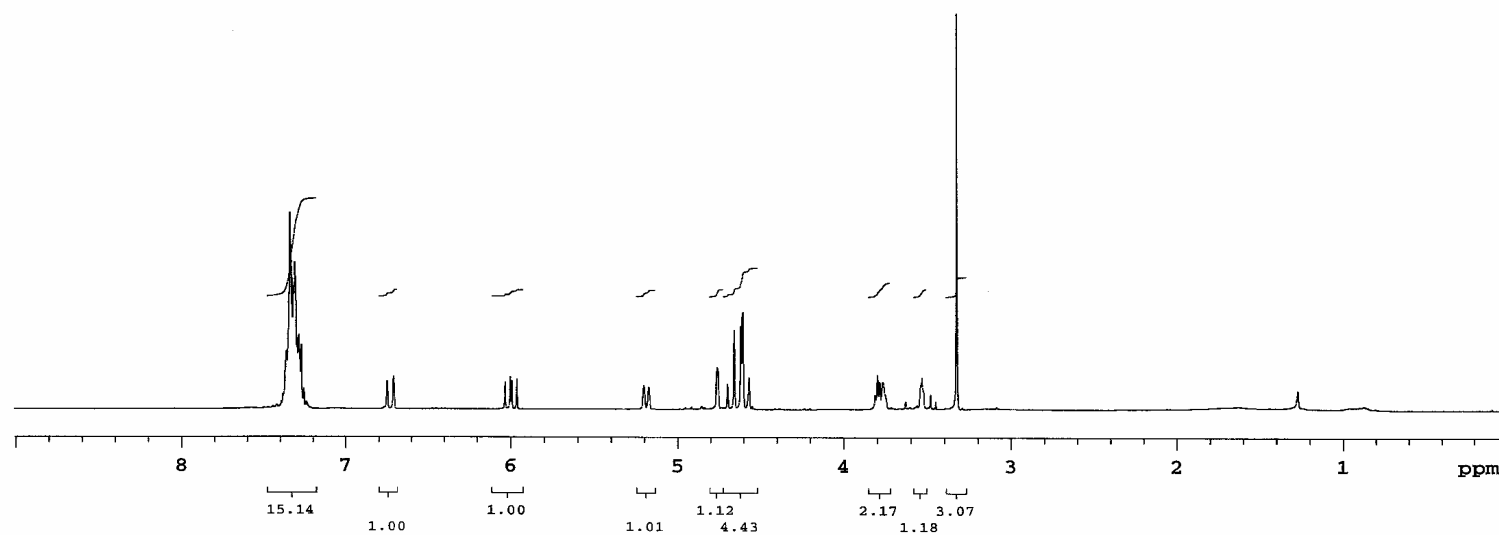

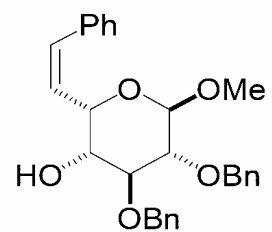

9j

$^{13}\text{C}$  NMR, 75MHz,  $\text{CDCl}_3$

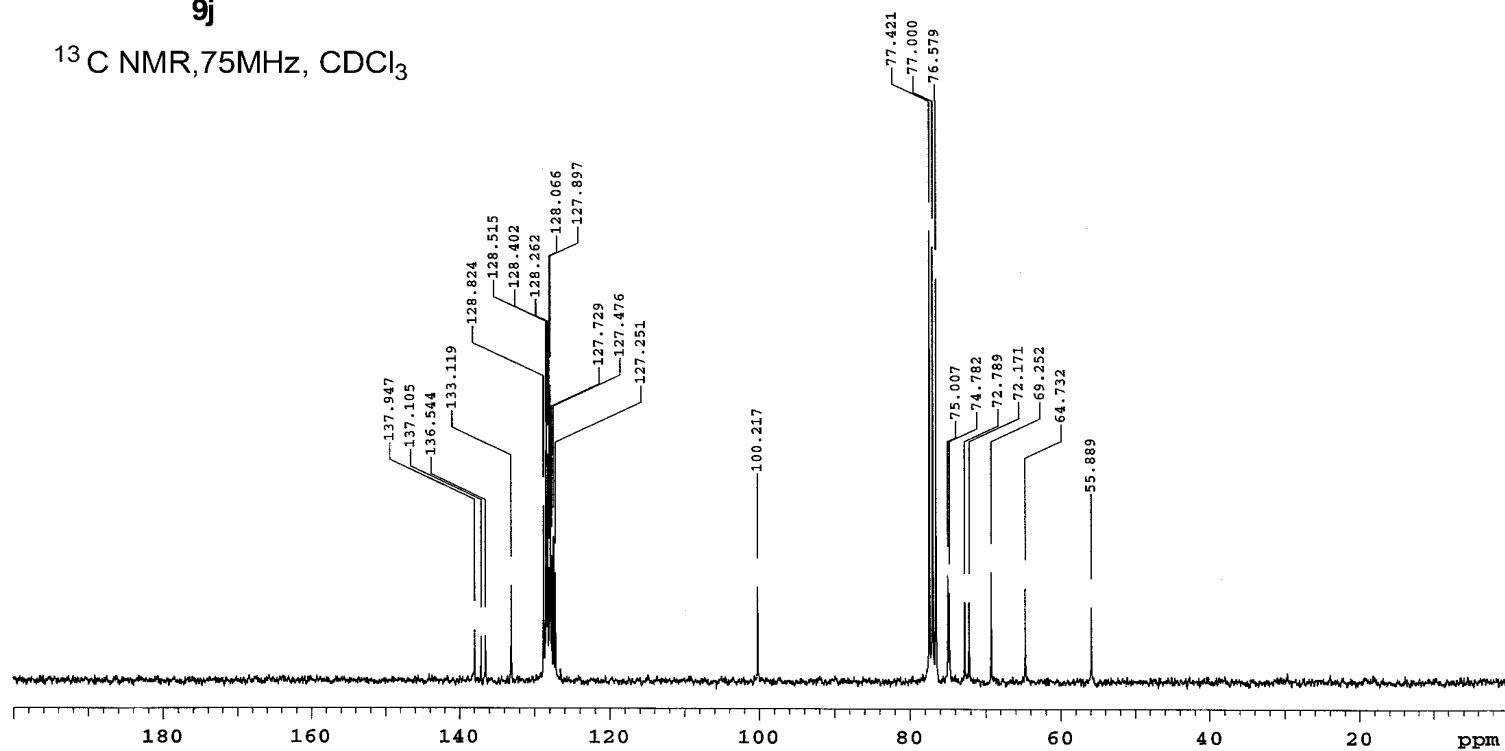

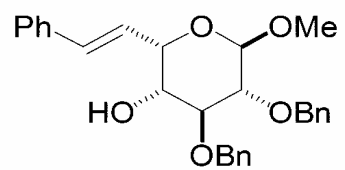

**9k**

$^1\text{H}$  NMR, 300MHz,  $\text{CDCl}_3$

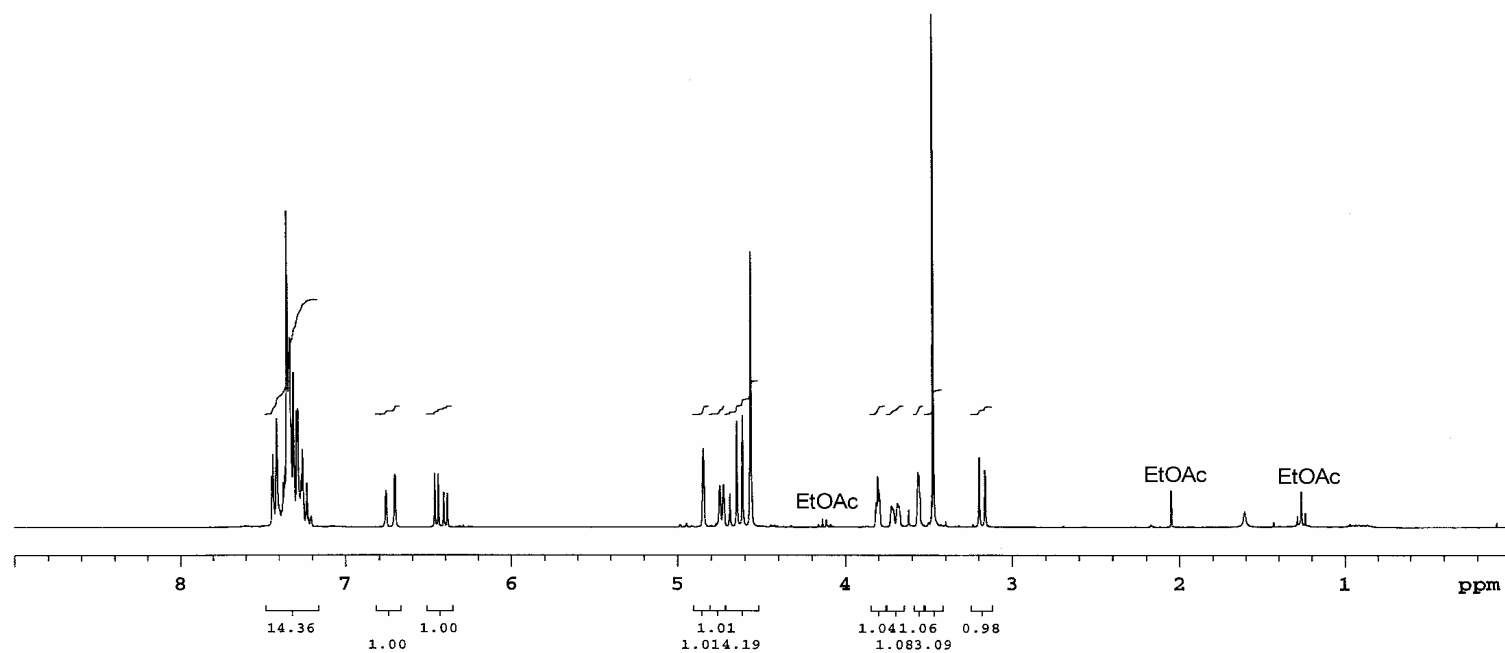

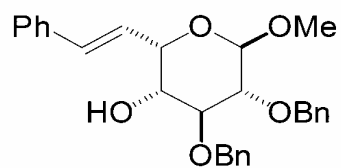

**9k**

$^{13}\text{C}$  NMR, 75MHz,  $\text{CDCl}_3$

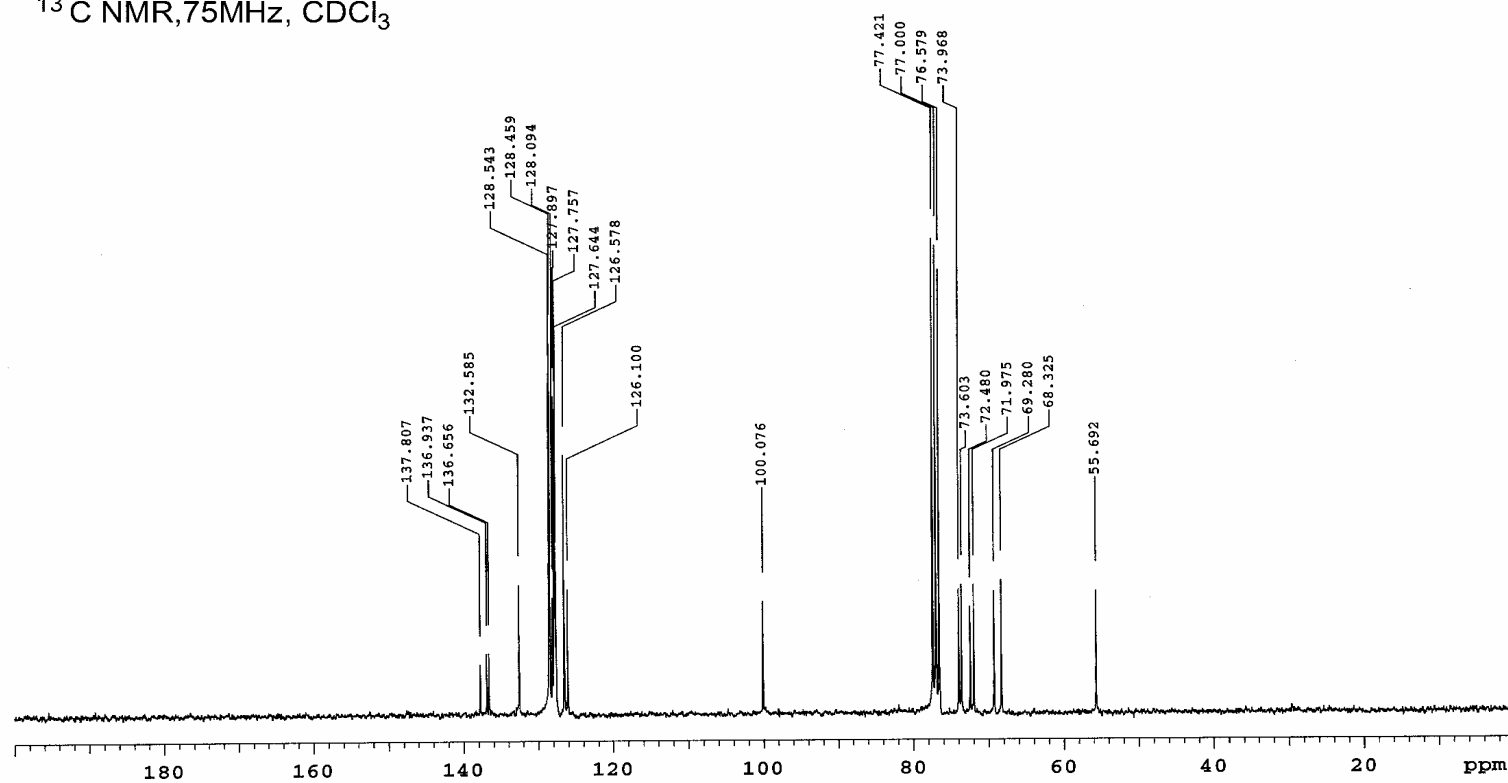

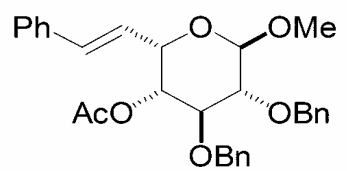

$^1\text{H}$  NMR, 300MHz,  $\text{CDCl}_3$

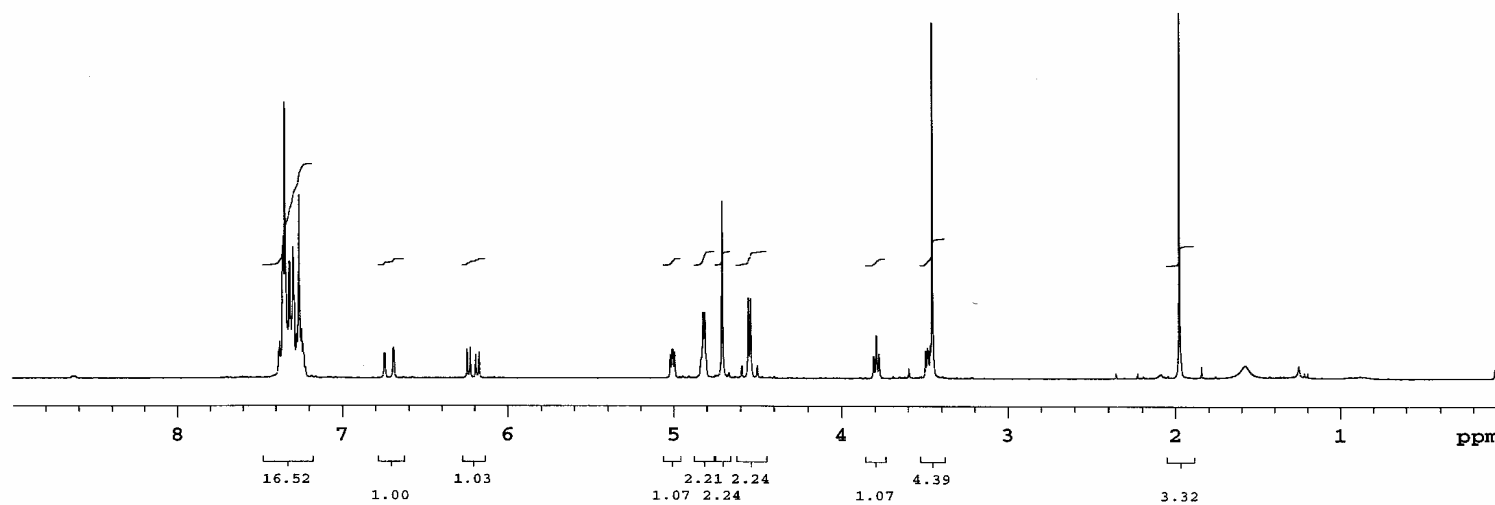

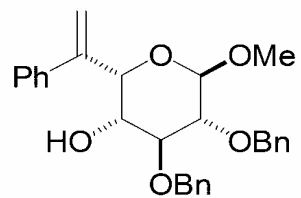

**9l**

$^1\text{H}$  NMR, 300MHz,  $\text{CDCl}_3$

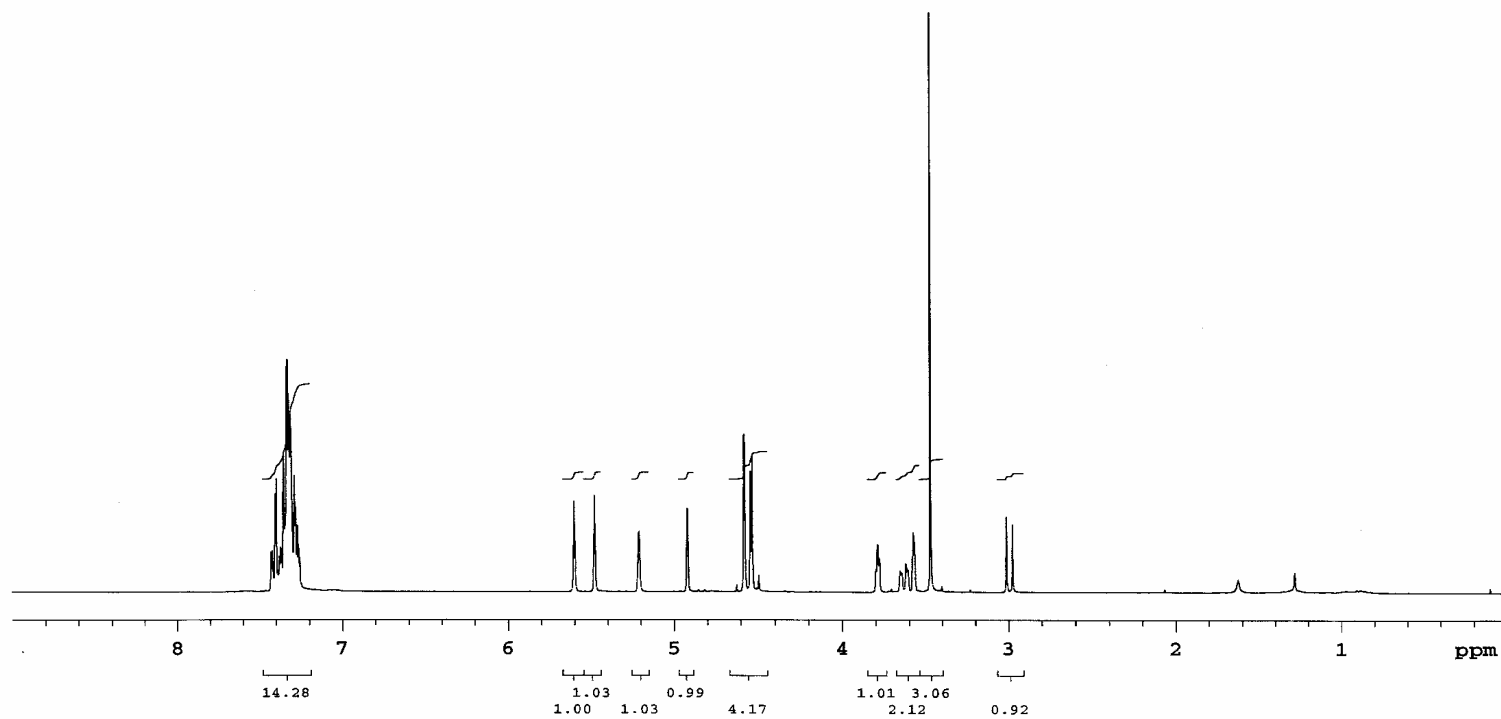

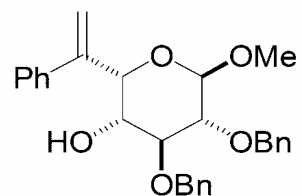

**9I**

$^{13}\text{C}$  NMR, 75MHz,  $\text{CDCl}_3$

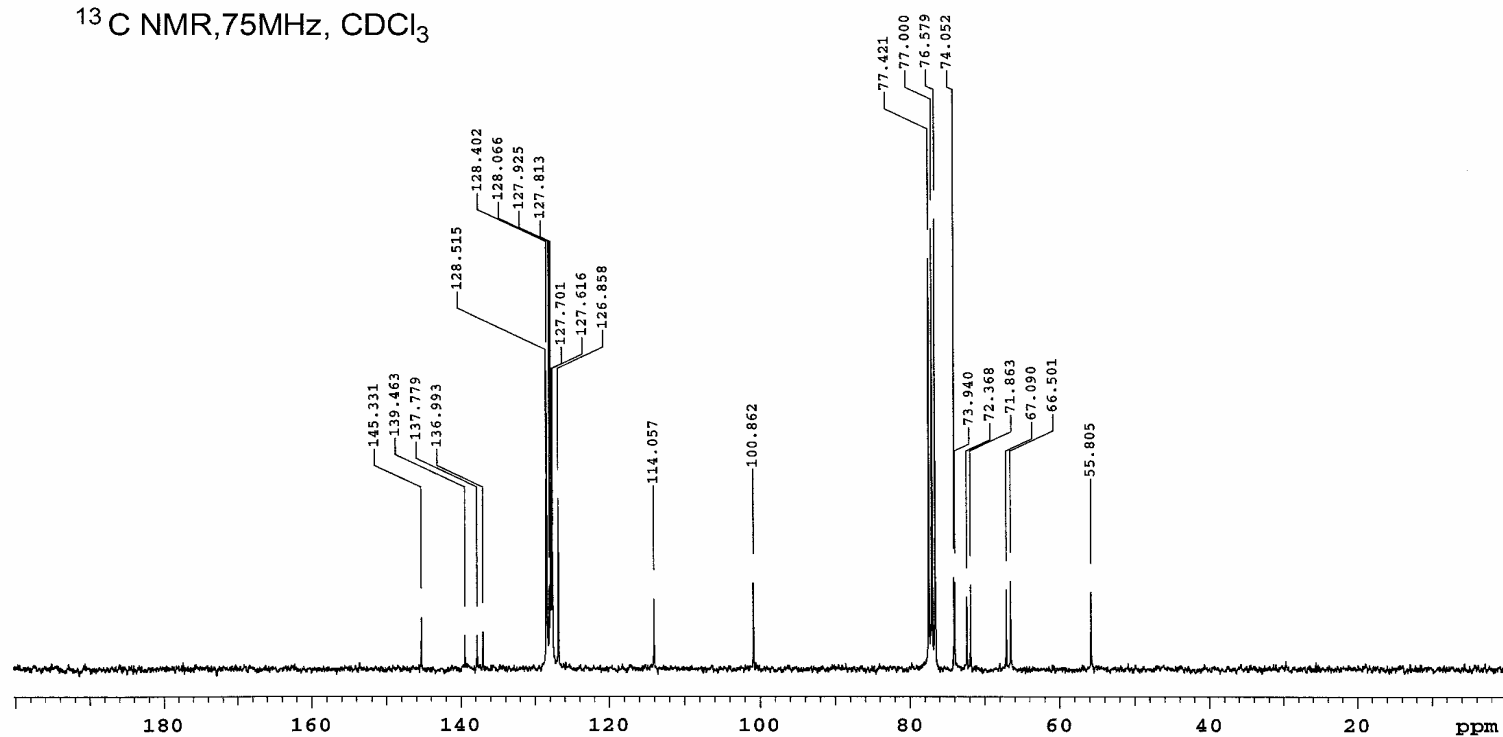

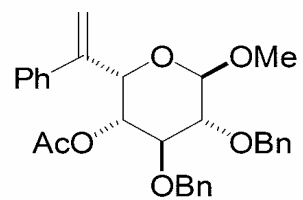

<sup>1</sup>H NMR, 300MHz, CDCl<sub>3</sub>

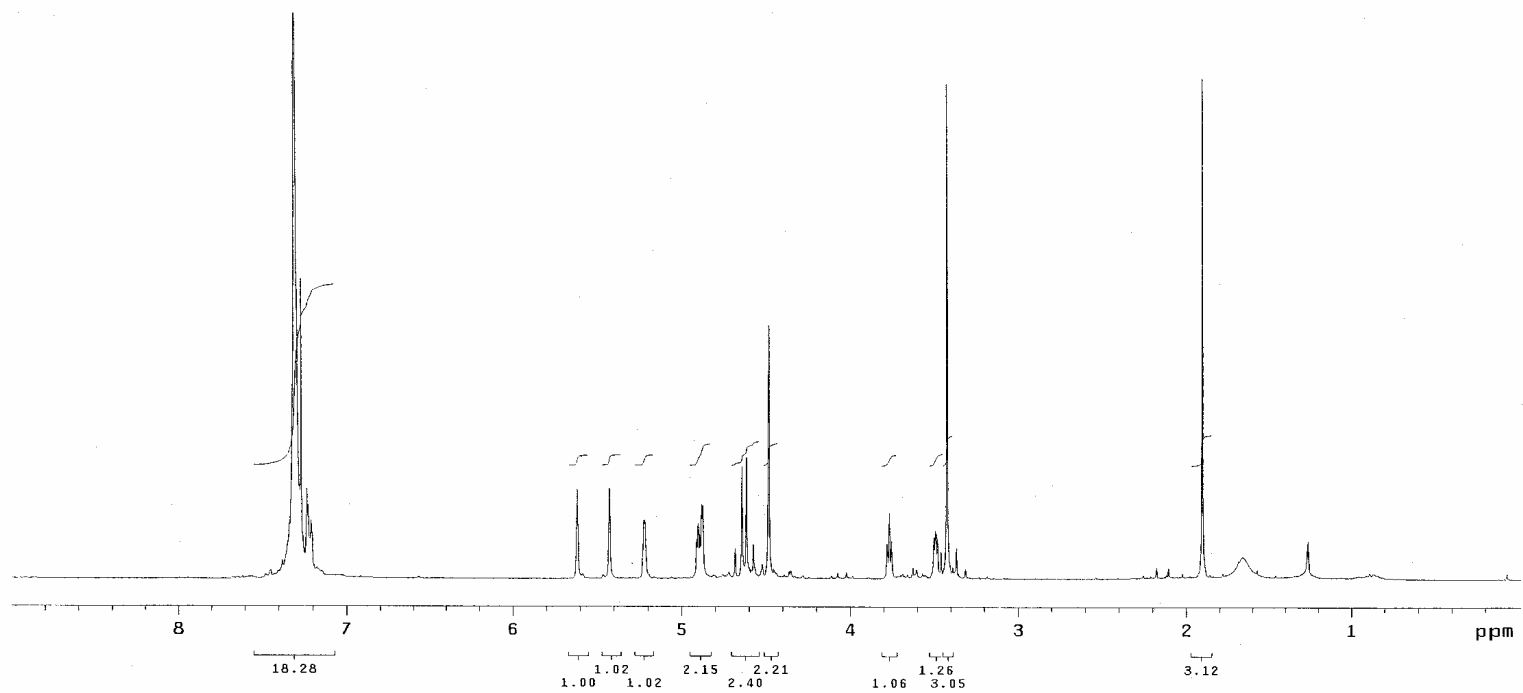



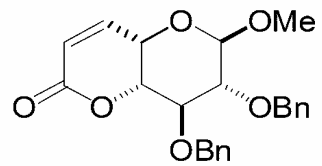

**9m**

$^1\text{H}$  NMR, 300MHz,  $\text{CDCl}_3$

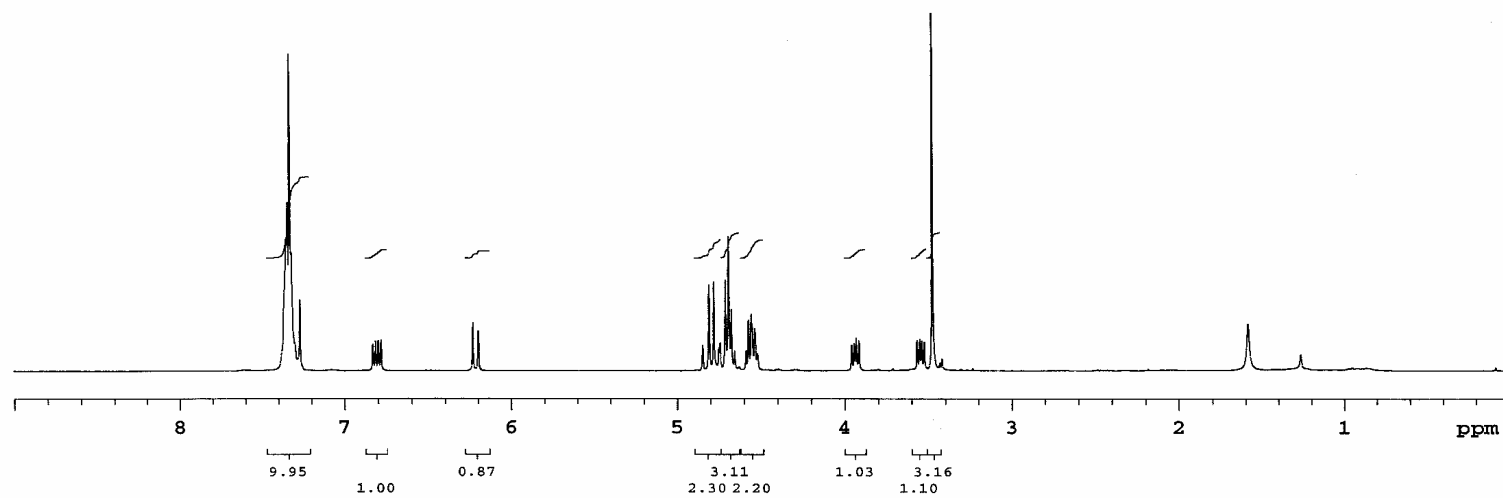

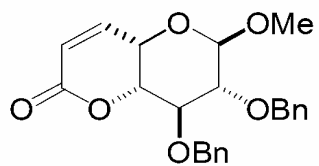

**9m**

$^{13}\text{C}$  NMR, 75MHz,  $\text{CDCl}_3$

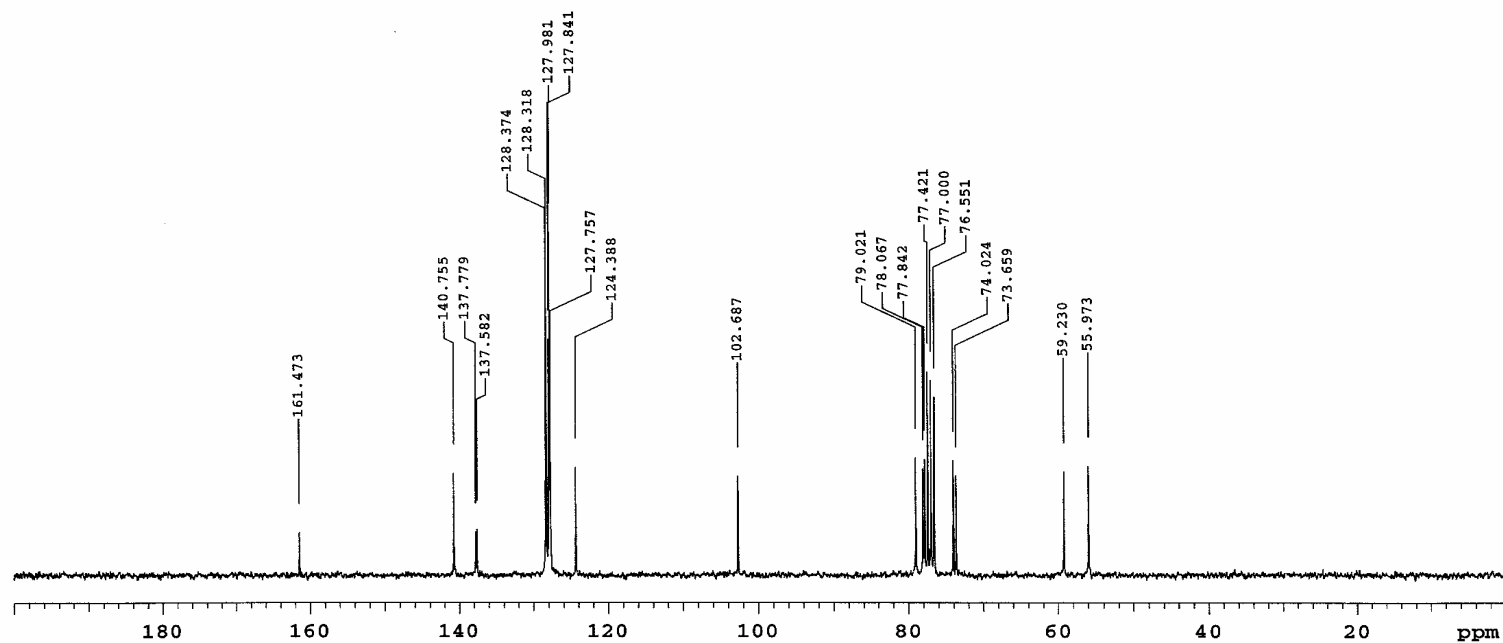

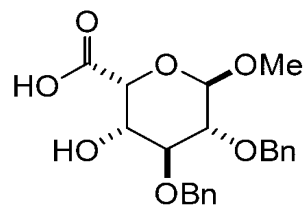

**12**

$^1\text{H}$  NMR, 300MHz,  $\text{CD}_3\text{OD}$

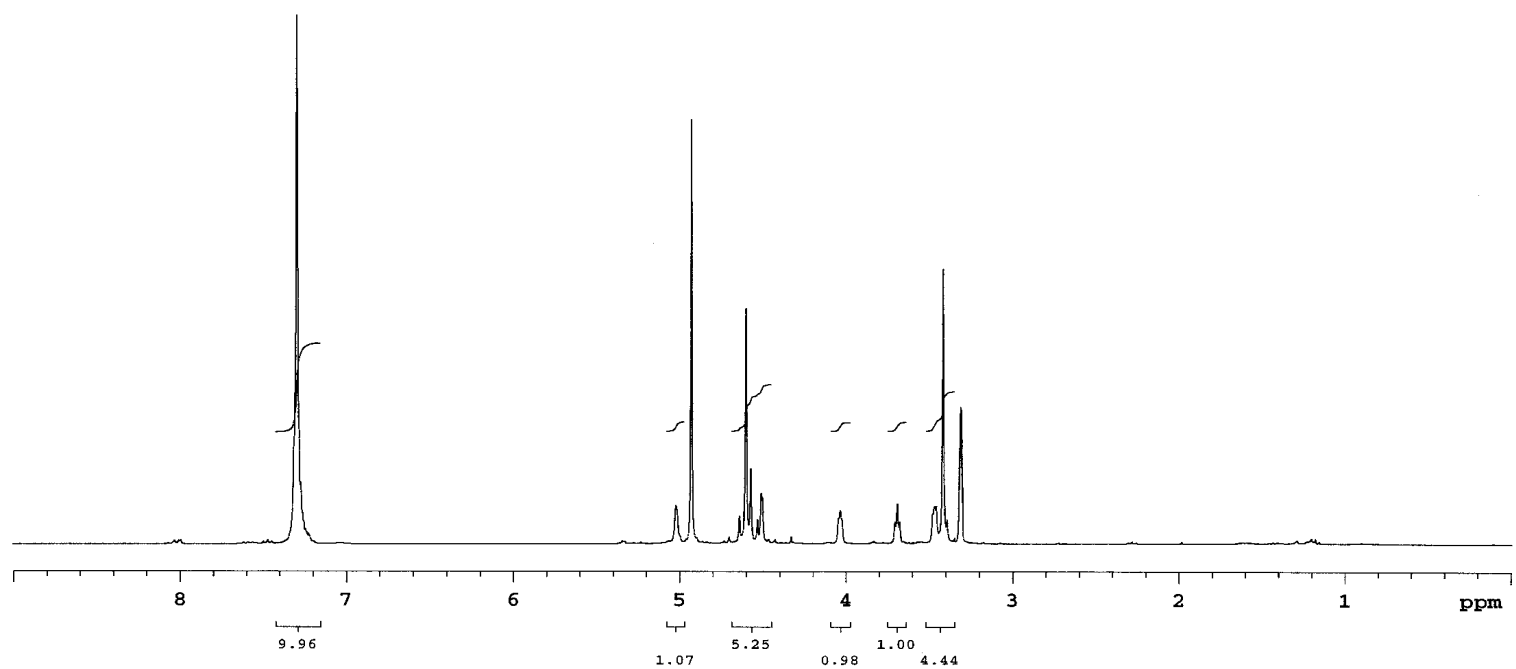

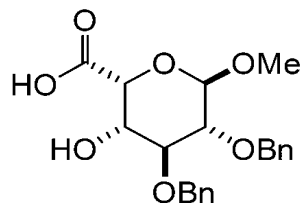

**12**

$^{13}\text{C}$  NMR, 75MHz,  $\text{CD}_3\text{OD}$

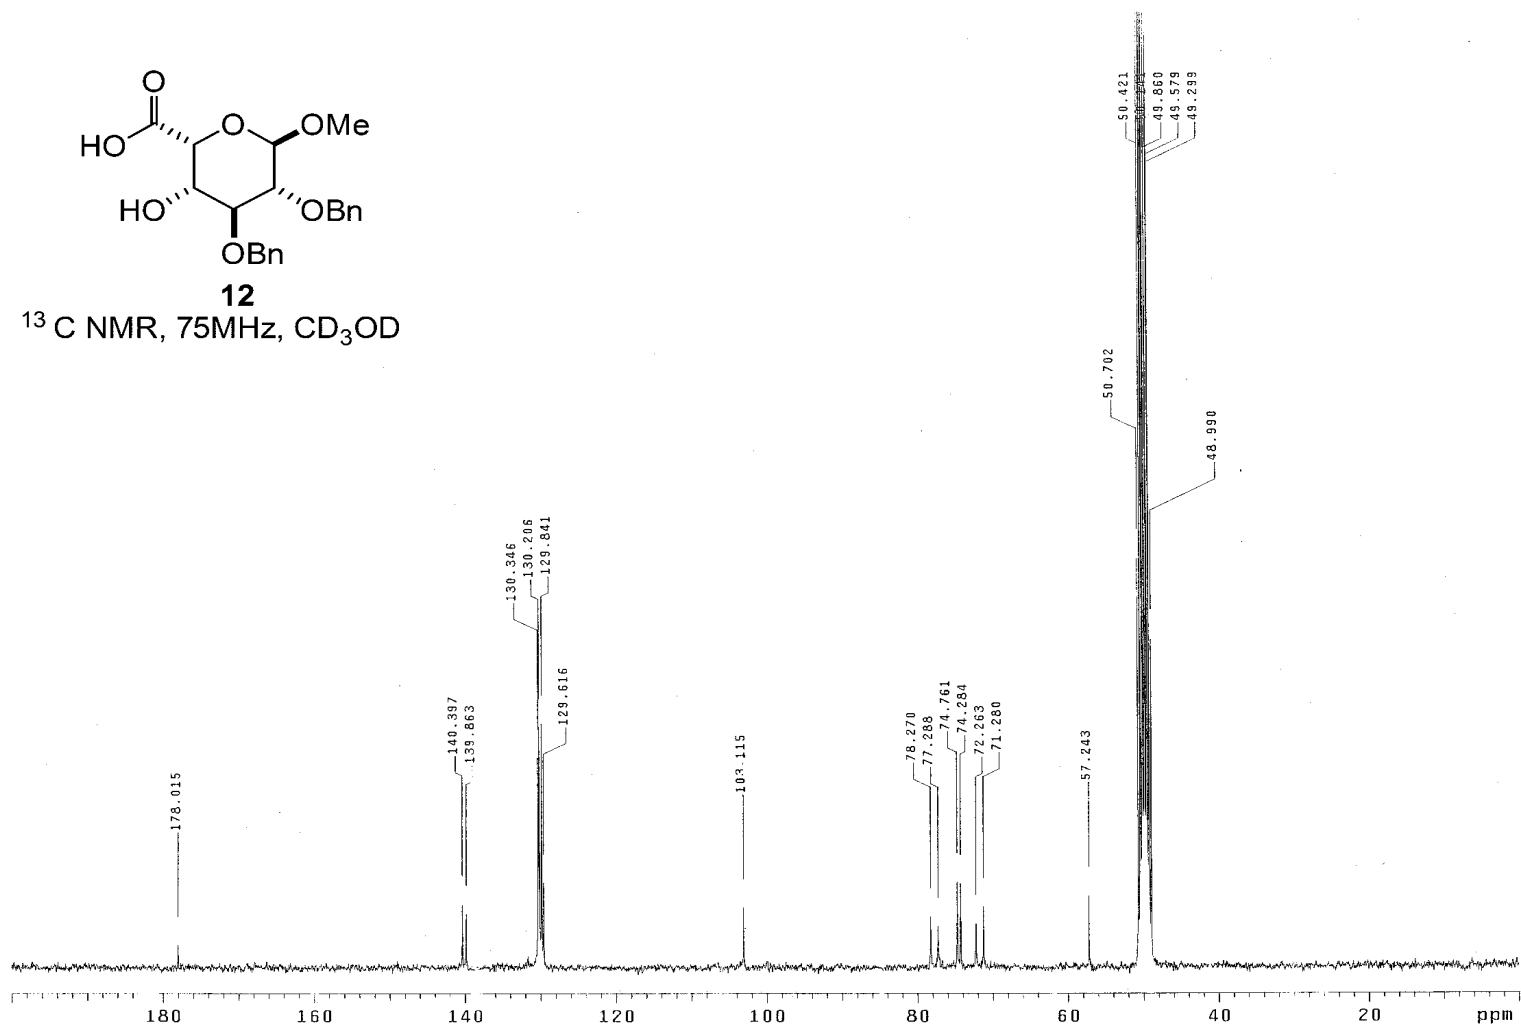

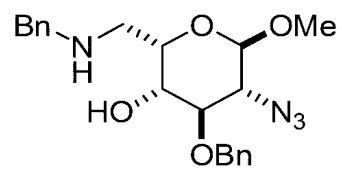

**13**

<sup>1</sup>H NMR, 300MHz, CDCl<sub>3</sub>

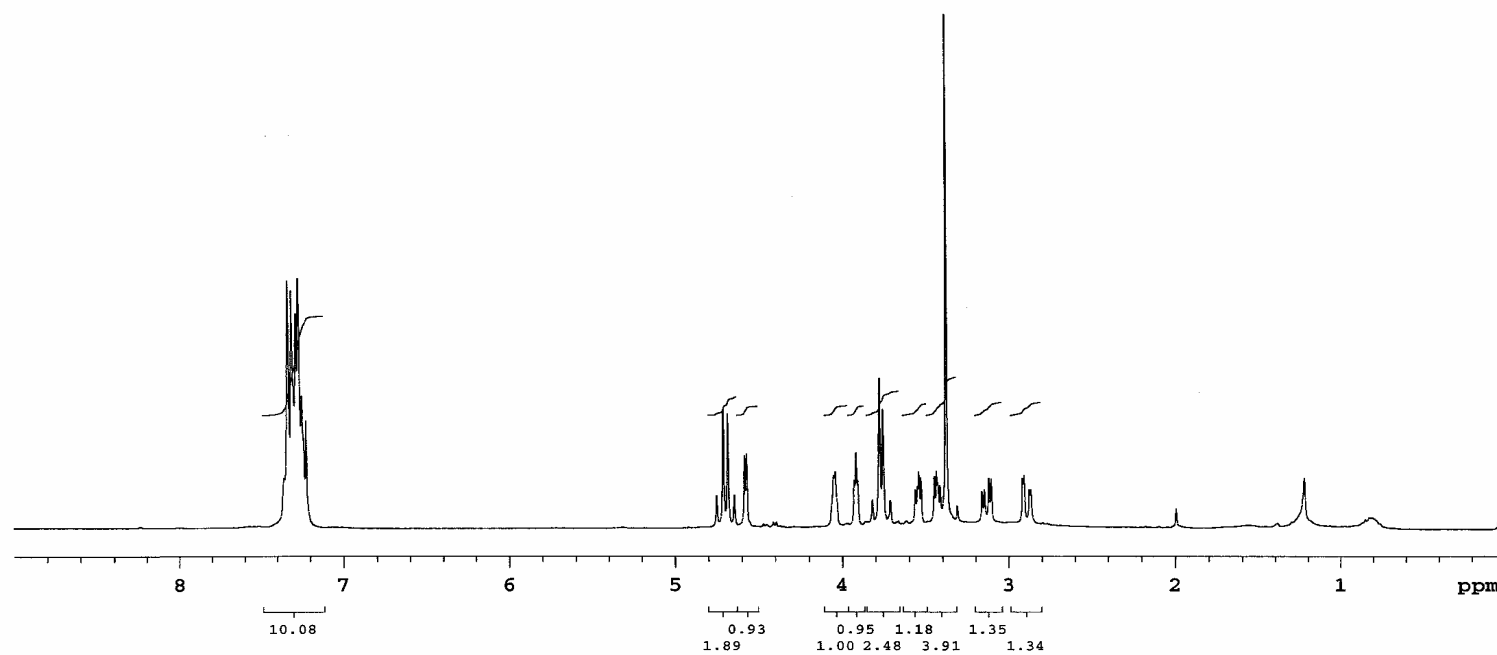

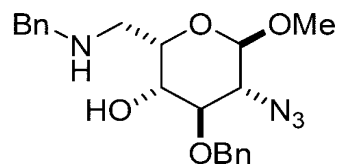

**13**

<sup>13</sup>C NMR, 75MHz, CDCl<sub>3</sub>

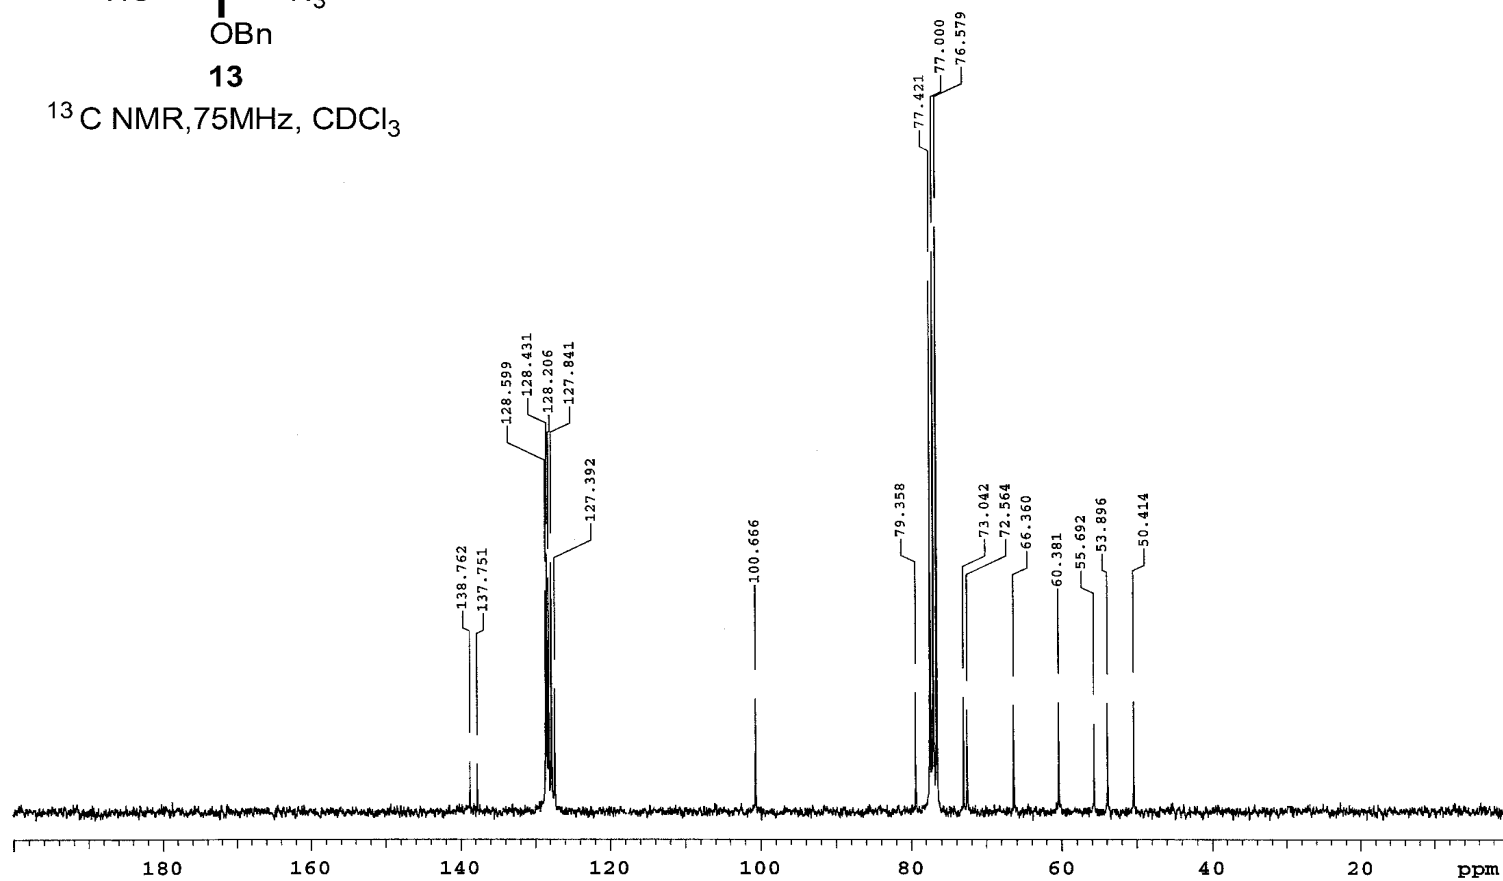

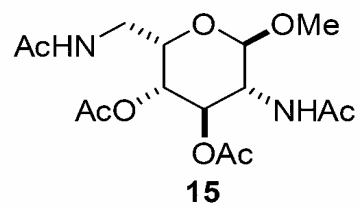

$^1\text{H}$  NMR, 300MHz,  $\text{CDCl}_3$

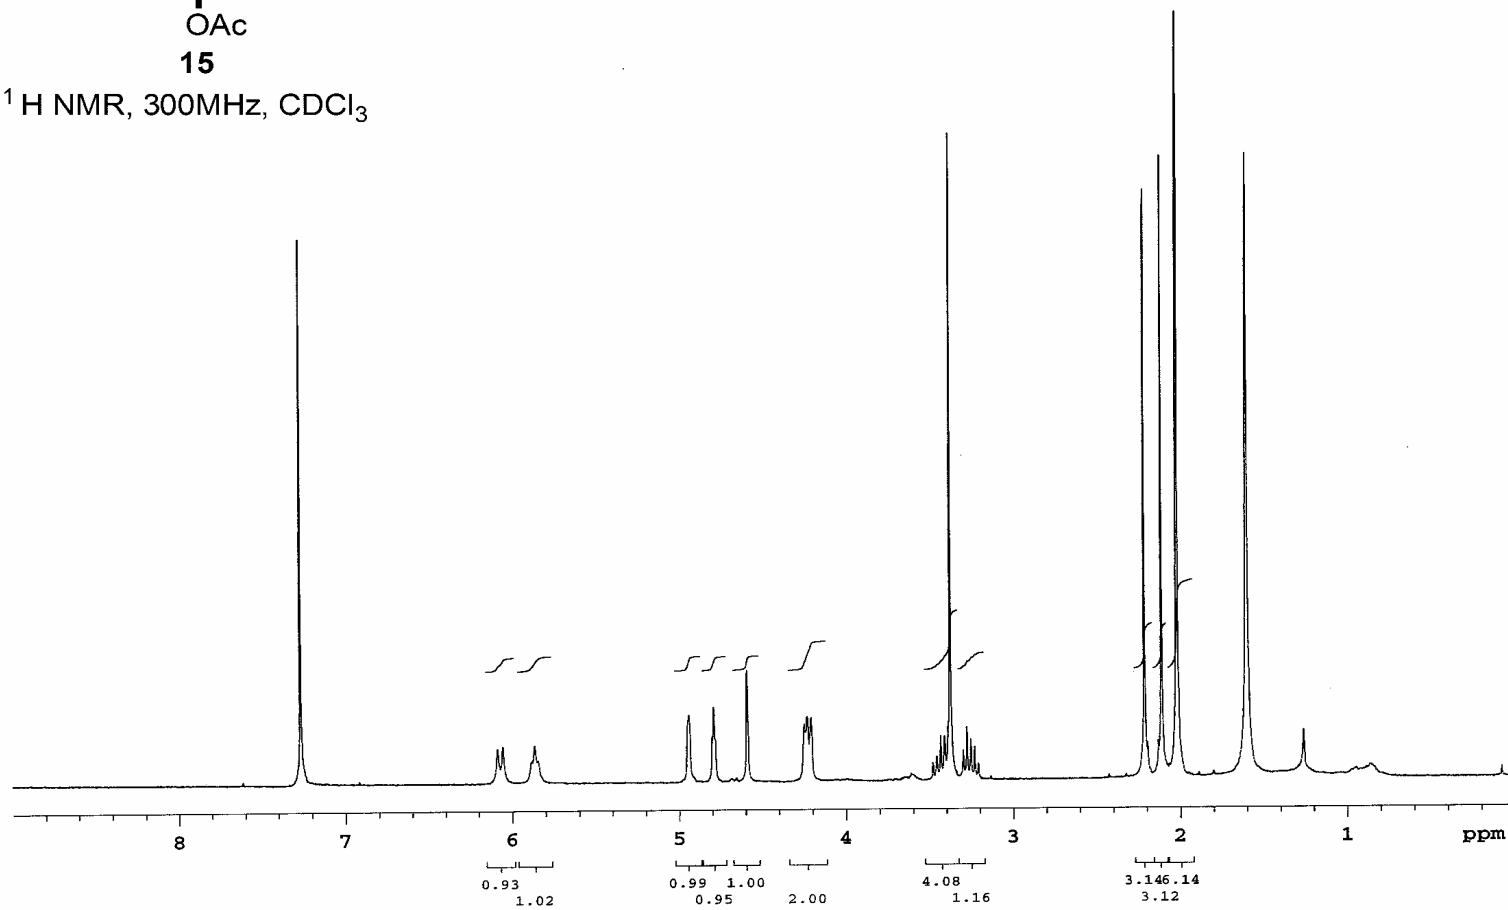

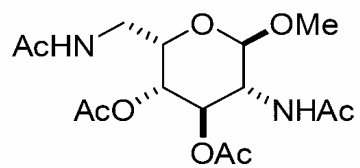

**15**

$^{13}\text{C}$  NMR, 100MHz,  $\text{CDCl}_3$

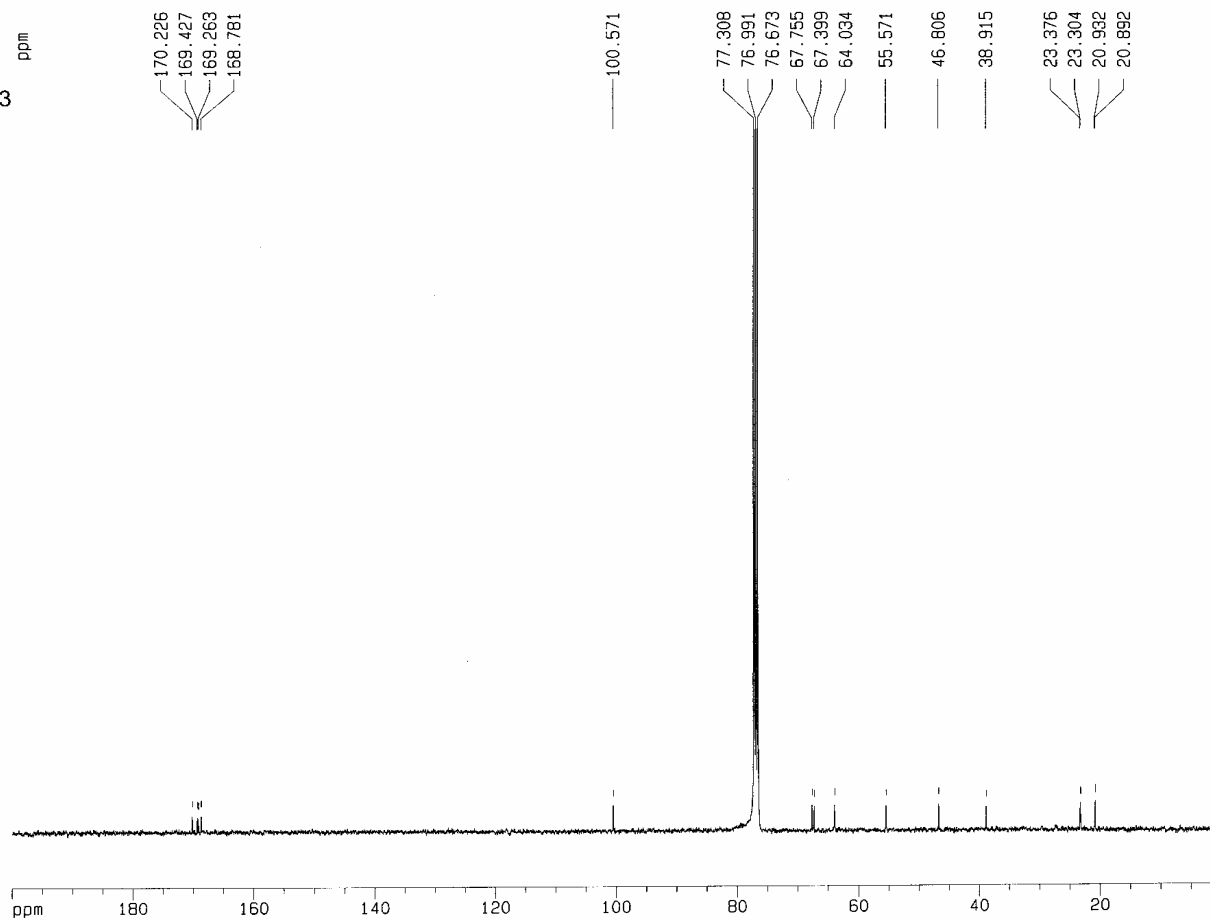



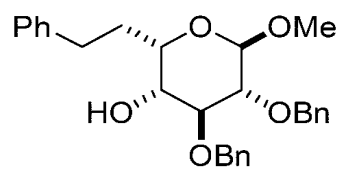

**16**

<sup>1</sup>H NMR, 300MHz, CDCl<sub>3</sub>

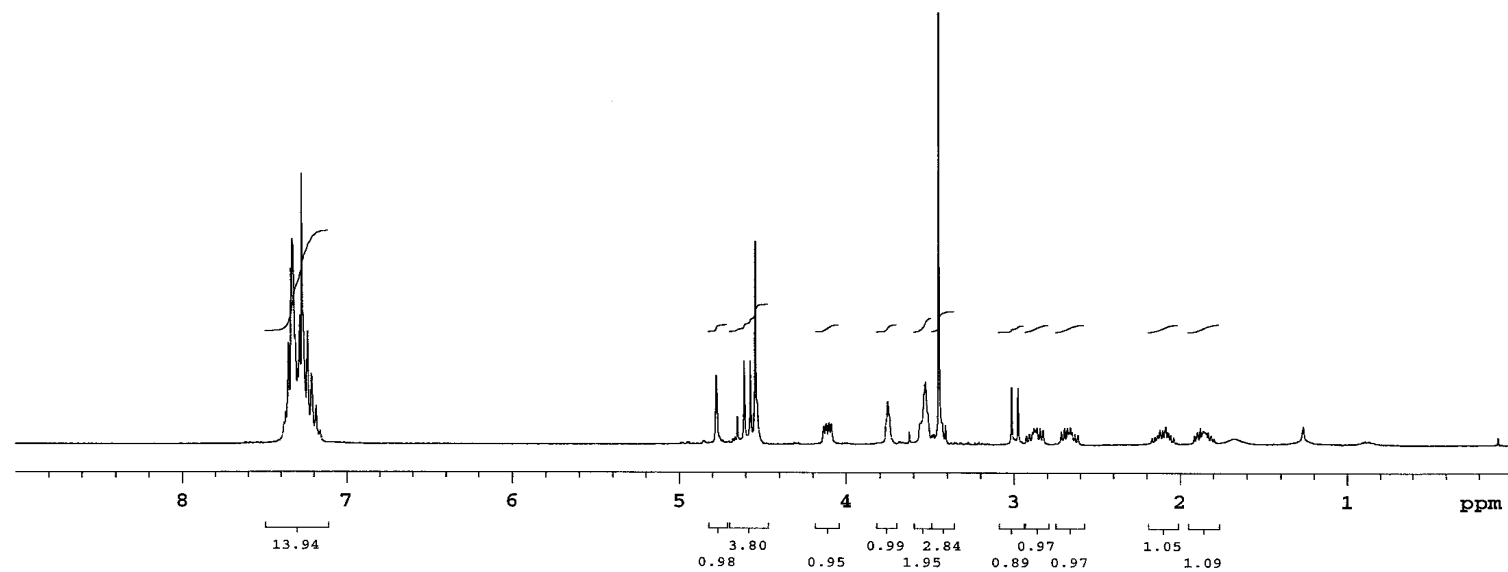

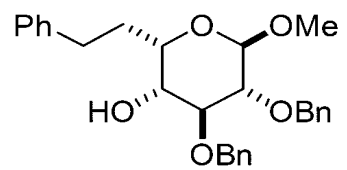

**16**

$^{13}\text{C}$  NMR, 75MHz,  $\text{CDCl}_3$

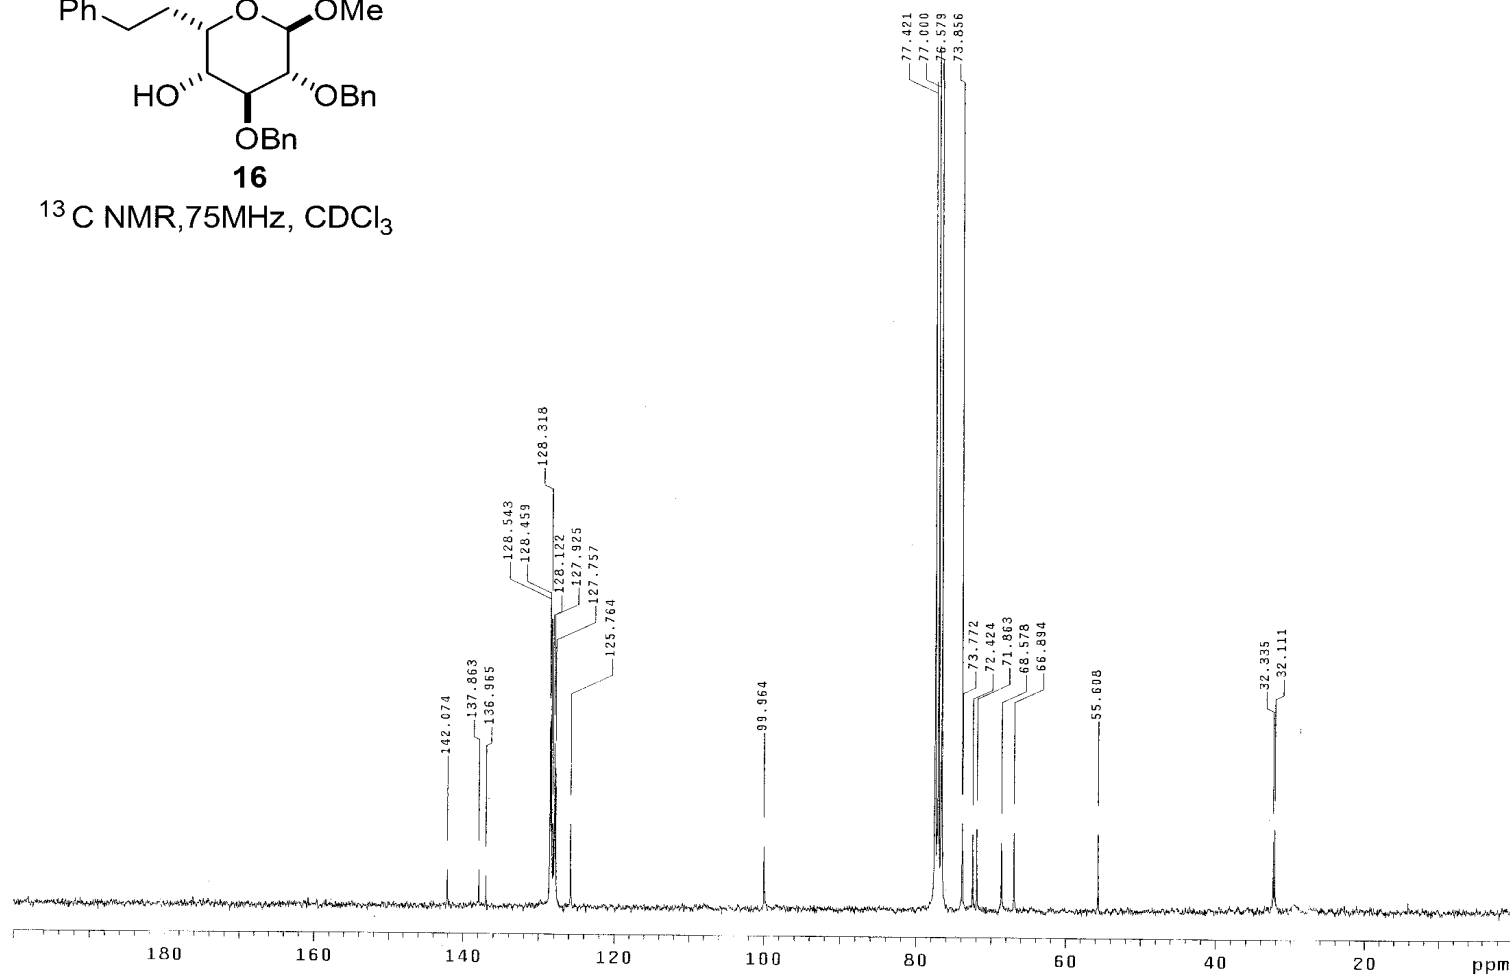

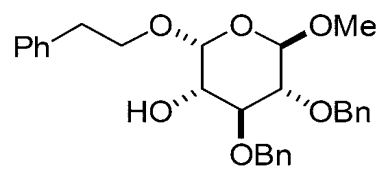

**17**

$^1\text{H}$  NMR, 300MHz,  $\text{CDCl}_3$

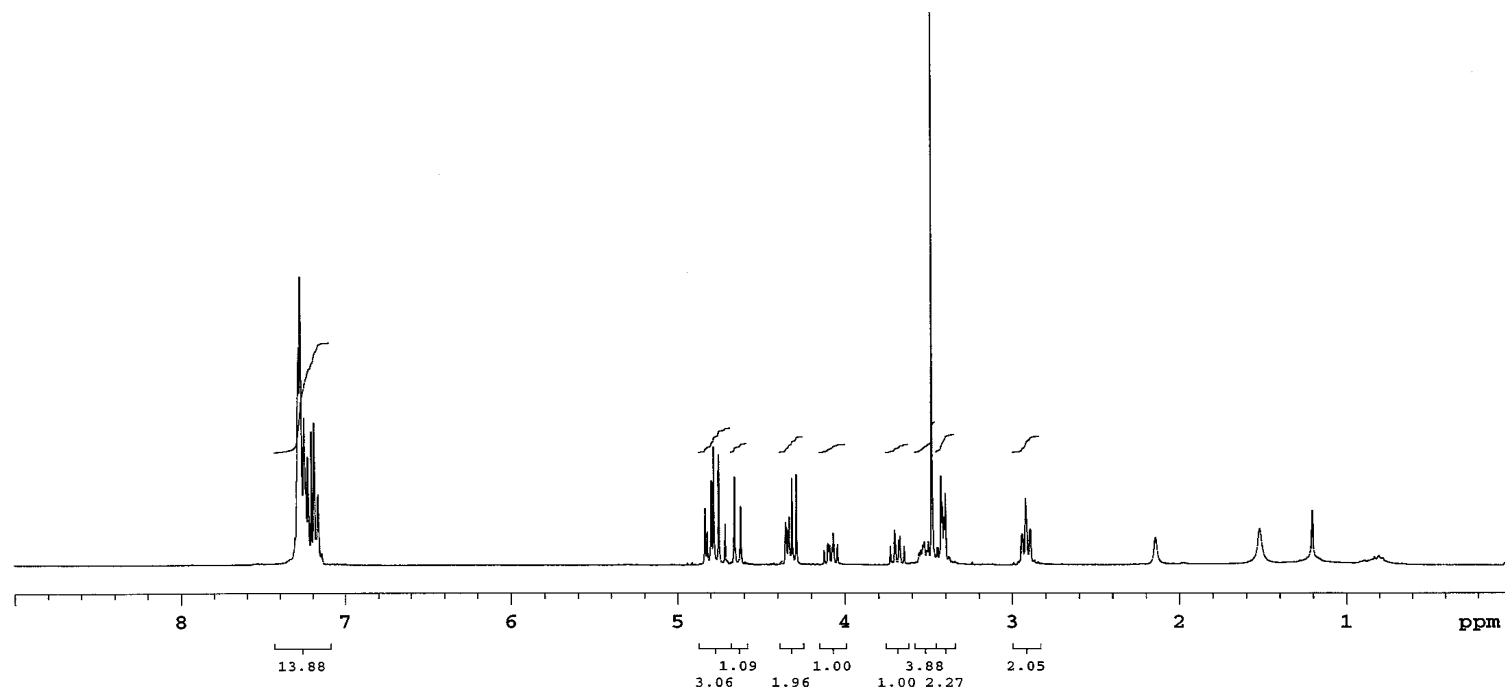

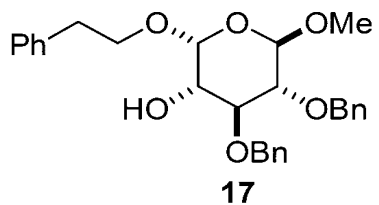

$^{13}\text{C}$  NMR, 75MHz,  $\text{CDCl}_3$

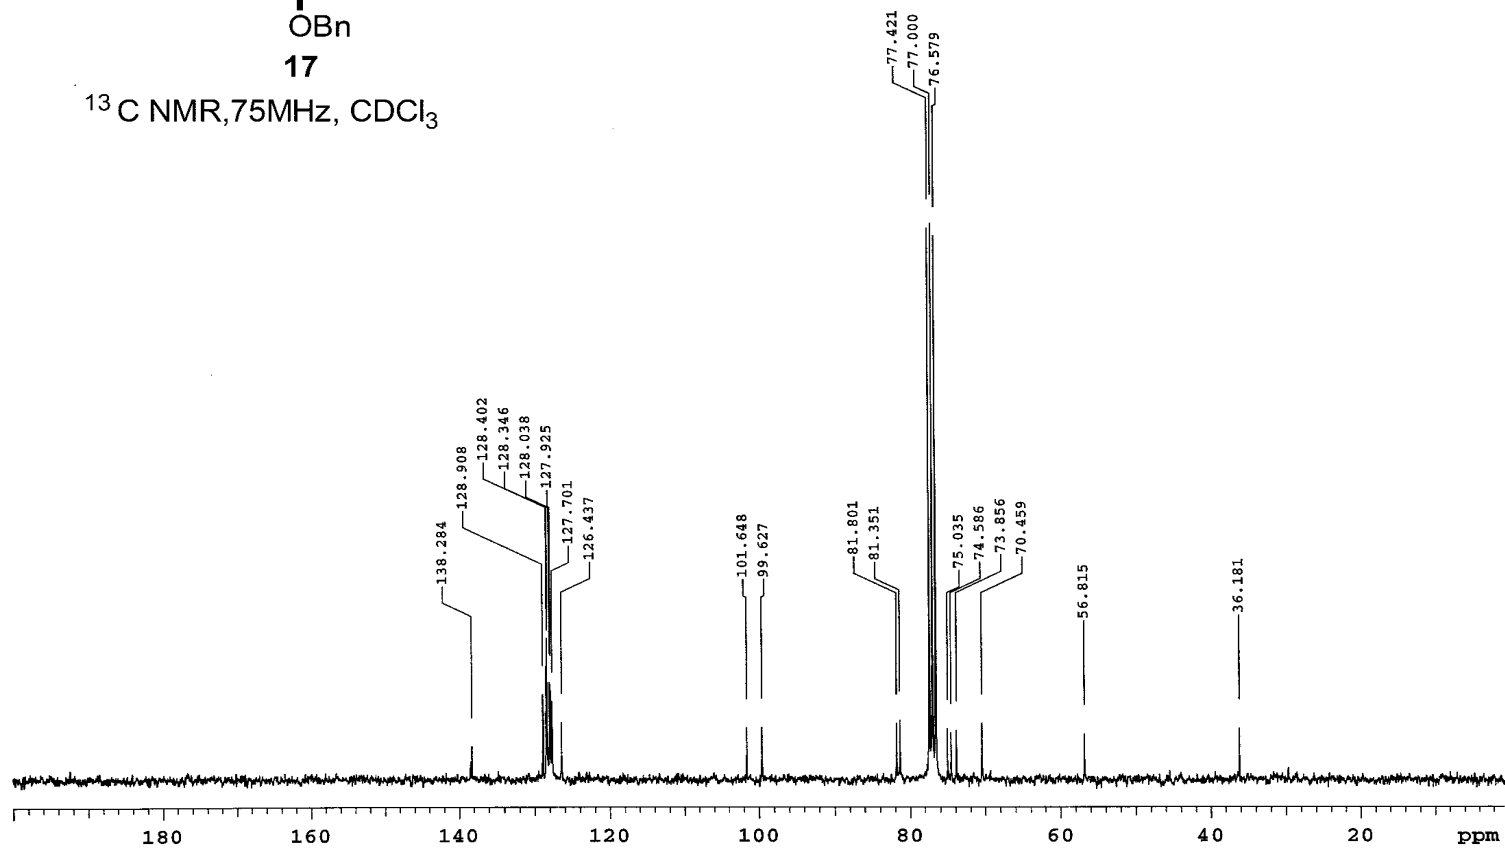

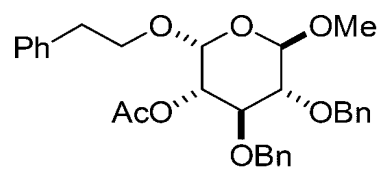

$^1\text{H}$  NMR, 300MHz,  $\text{CDCl}_3$

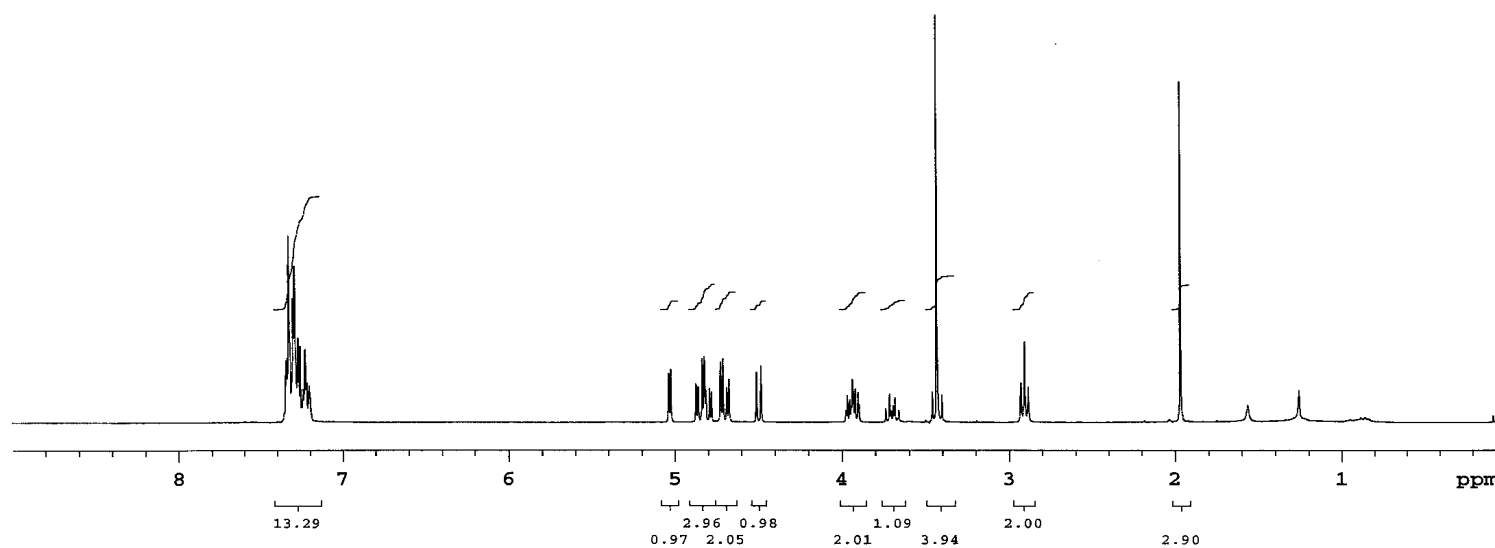

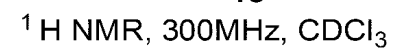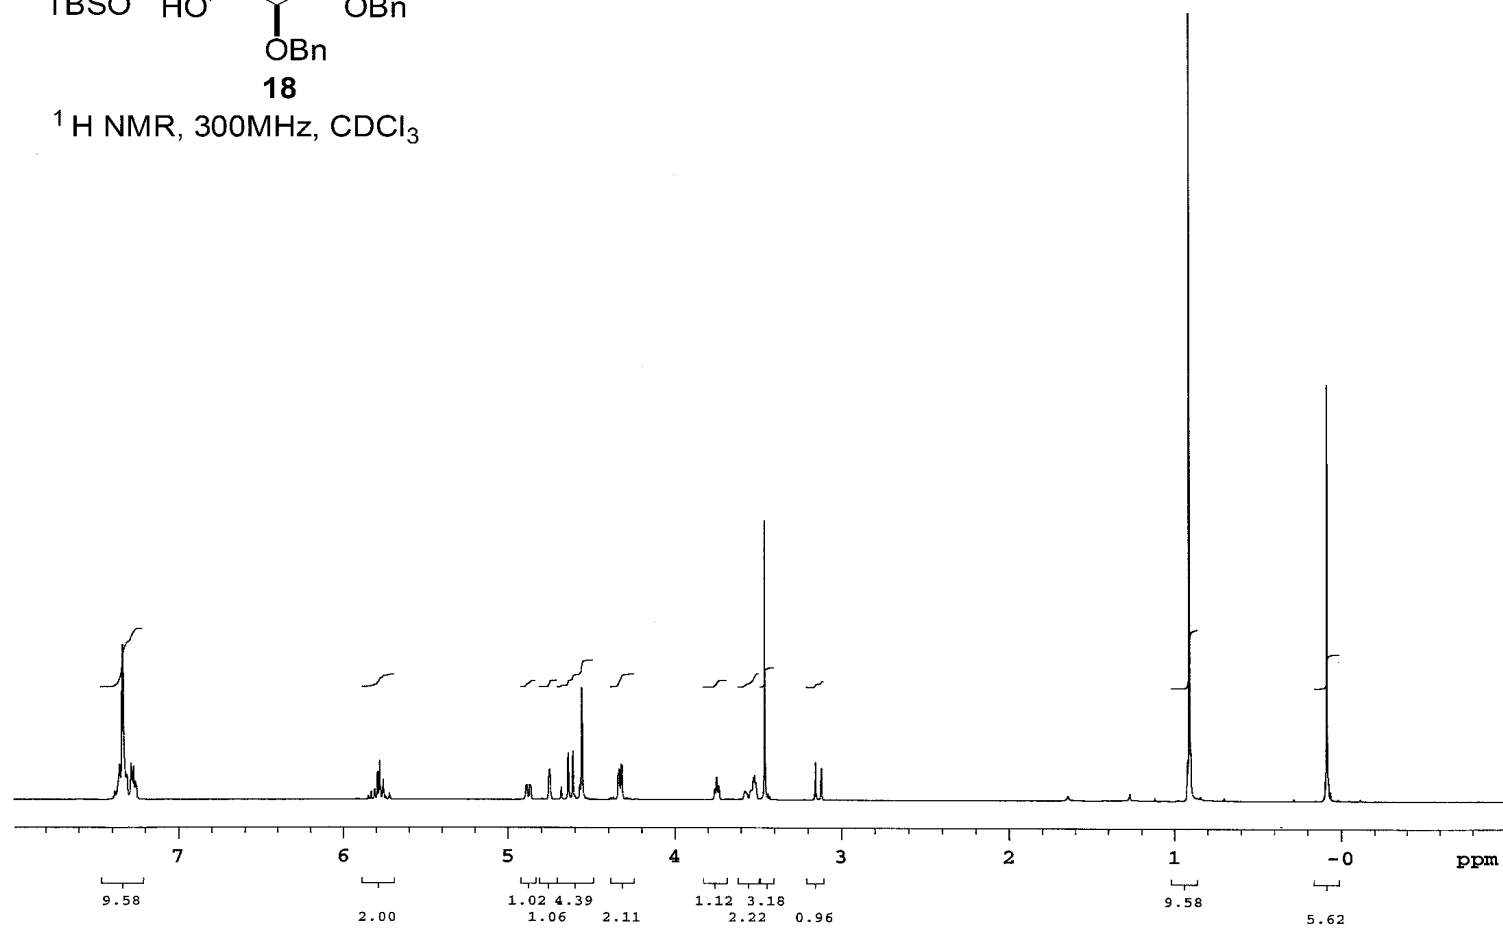

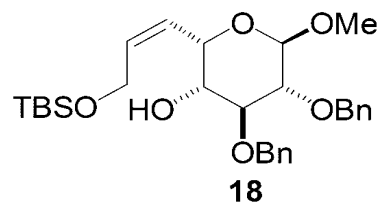

$^{13}\text{C}$  NMR, 75MHz,  $\text{CDCl}_3$

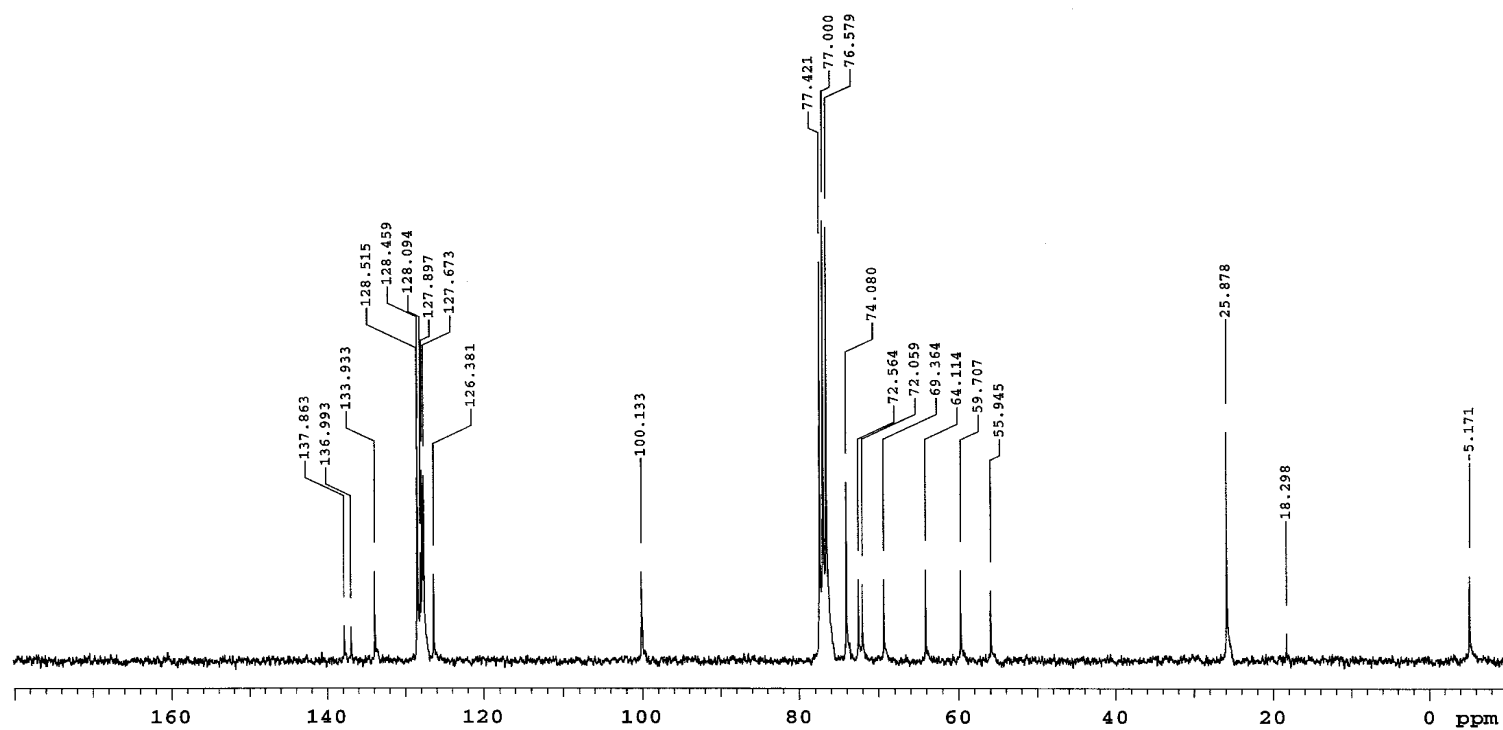

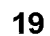



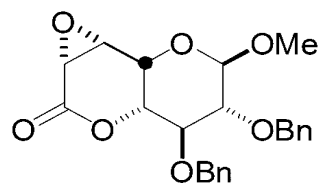

**19**

$^{13}\text{C}$  NMR, 100MHz,  $\text{CDCl}_3$

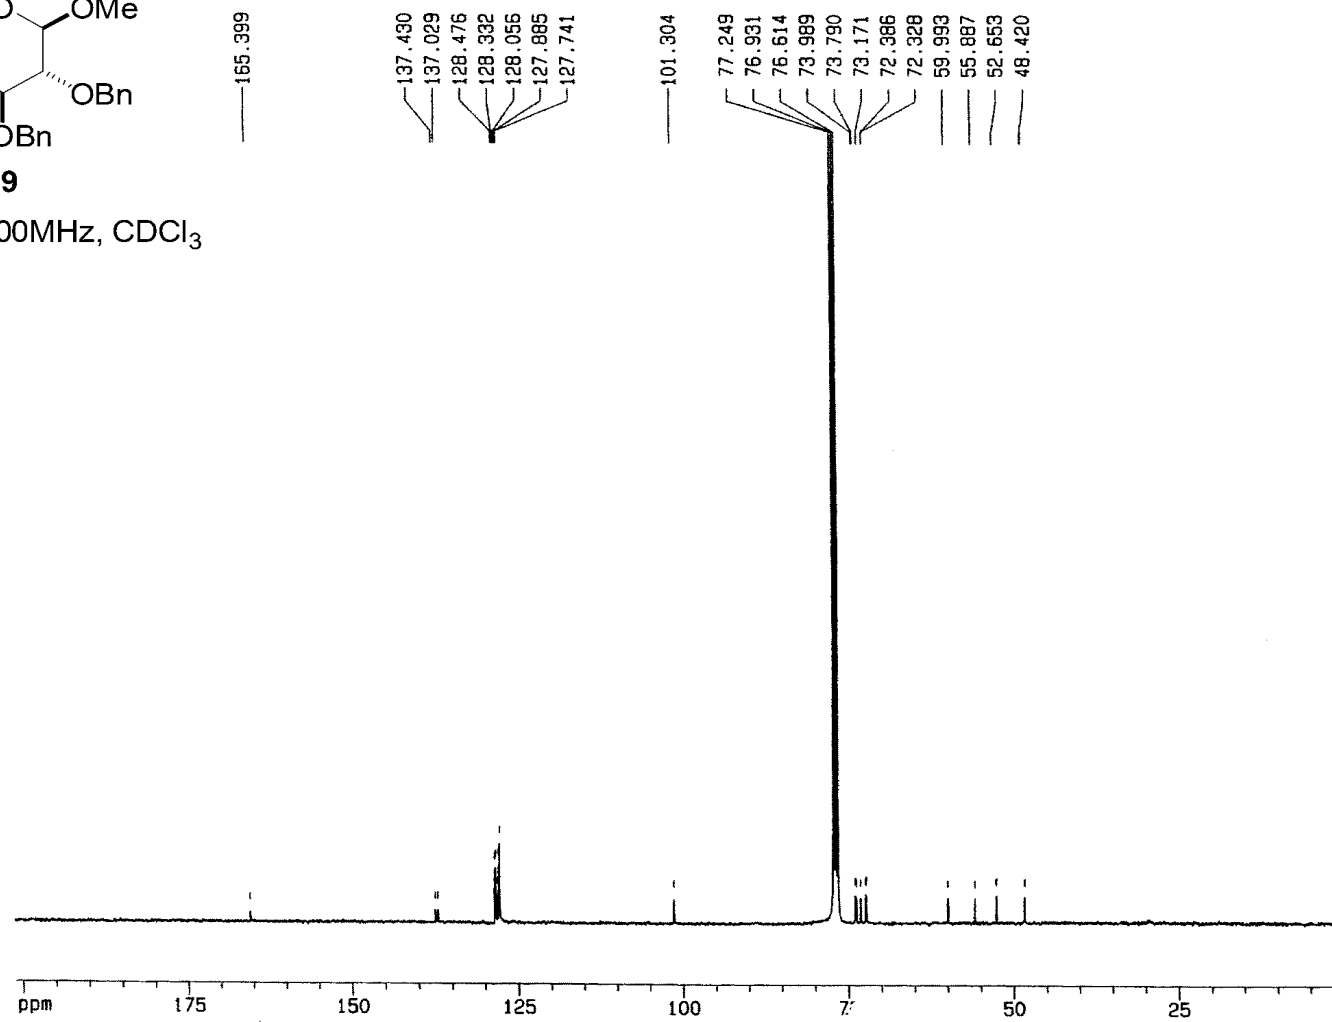

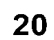

<sup>1</sup>H NMR spectrum of compound 6. The x-axis represents chemical shift in ppm, ranging from 0 to 10. The spectrum shows several distinct signals:

- Aromatic region (7.0-7.5 ppm): A multiplet centered around 7.33 ppm with integration values of 1.59, 1.55, 1.73, and 1.55.
- Aliphatic region (3.0-5.0 ppm): Multiple signals including a doublet at 4.80 ppm (integration 0.74), a singlet at 4.19 ppm (integration 1.00), a complex set of peaks between 3.75 and 3.60 ppm (integrations 3.75, 0.88, 0.95), and other smaller peaks at 3.80, 3.55, 3.45, 3.35, 3.25, 3.15, 3.05, 2.95, 2.85, 2.75, 2.65, 2.55, 2.45, 2.35, 2.25, 2.15, 2.05, 1.95, 1.85, 1.75, 1.65, 1.55, 1.45, 1.35, 1.25, 1.15, 1.05, 1.00, 0.95, 0.90, 0.85, 0.80, 0.75, 0.70, 0.65, 0.60, 0.55, 0.50, 0.45, 0.40, 0.35, 0.30, 0.25, 0.20, 0.15, 0.10, 0.05 ppm.

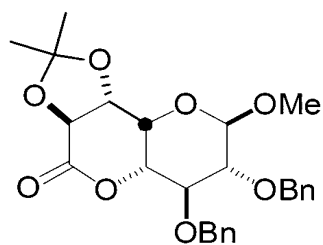

**20**

$^{13}\text{C}$  NMR, 100MHz,  $\text{C}_6\text{D}_6$

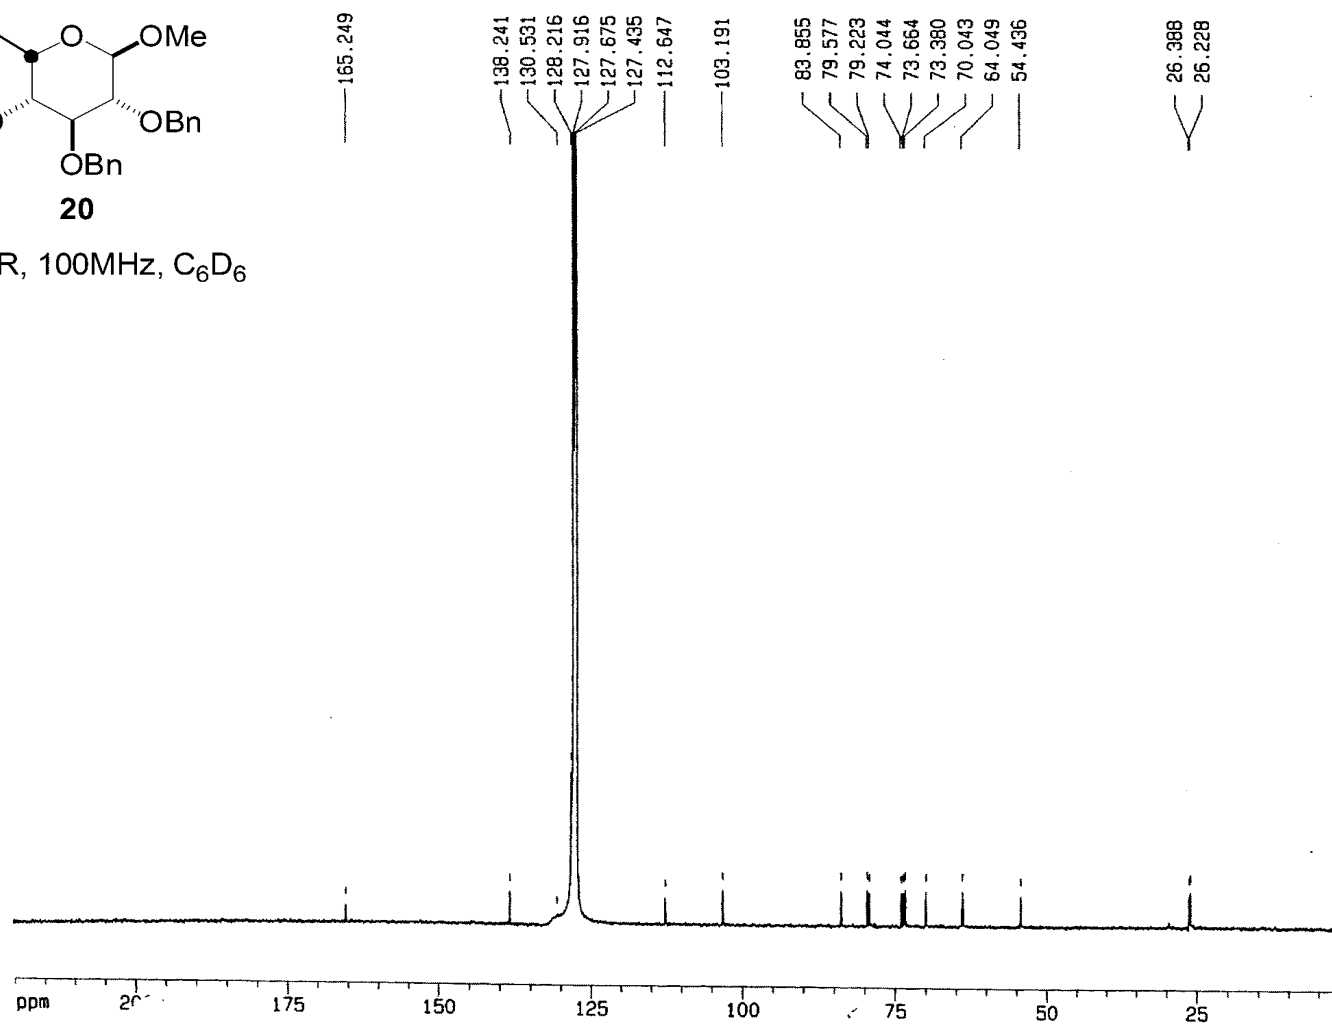

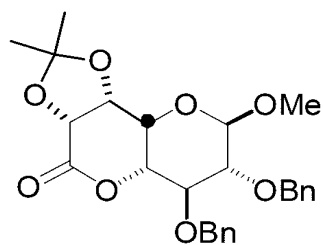

**21**

$^1\text{H}$  NMR, 300MHz,  $\text{C}_6\text{D}_6$

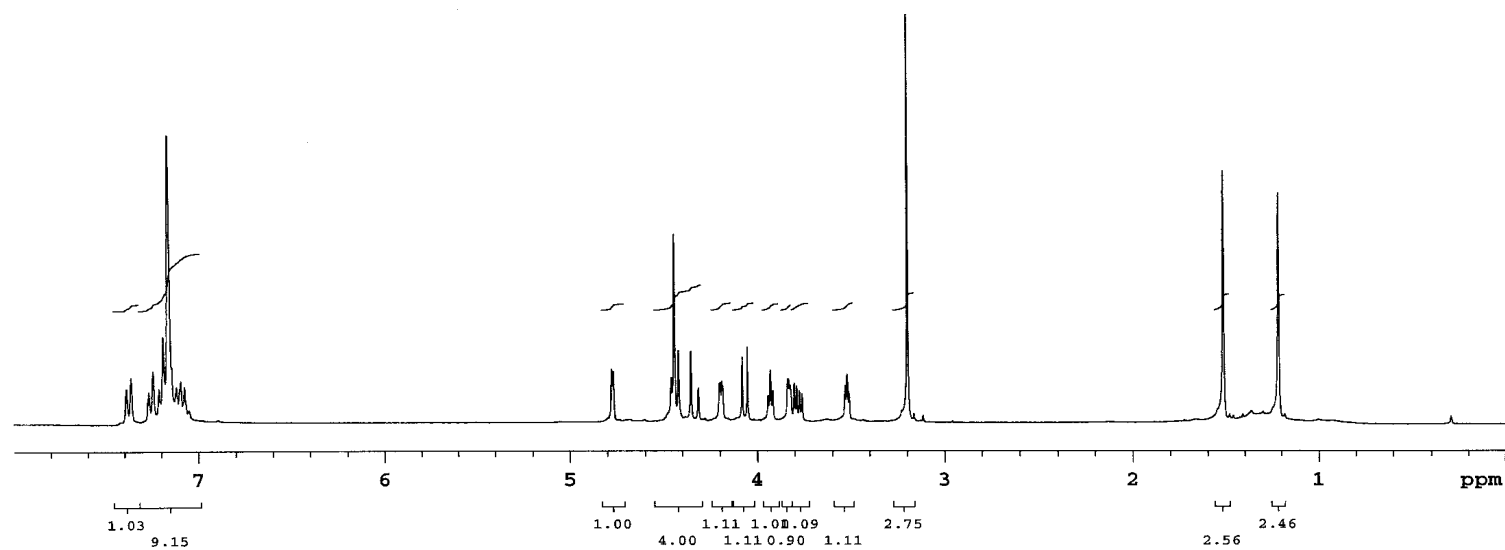

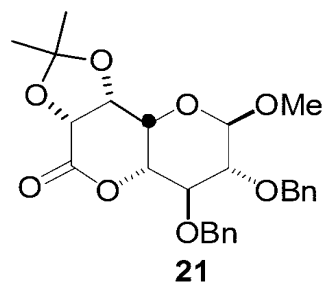

**21**  
 $^{13}\text{C}$  NMR, 75MHz,  $\text{C}_6\text{D}_6$

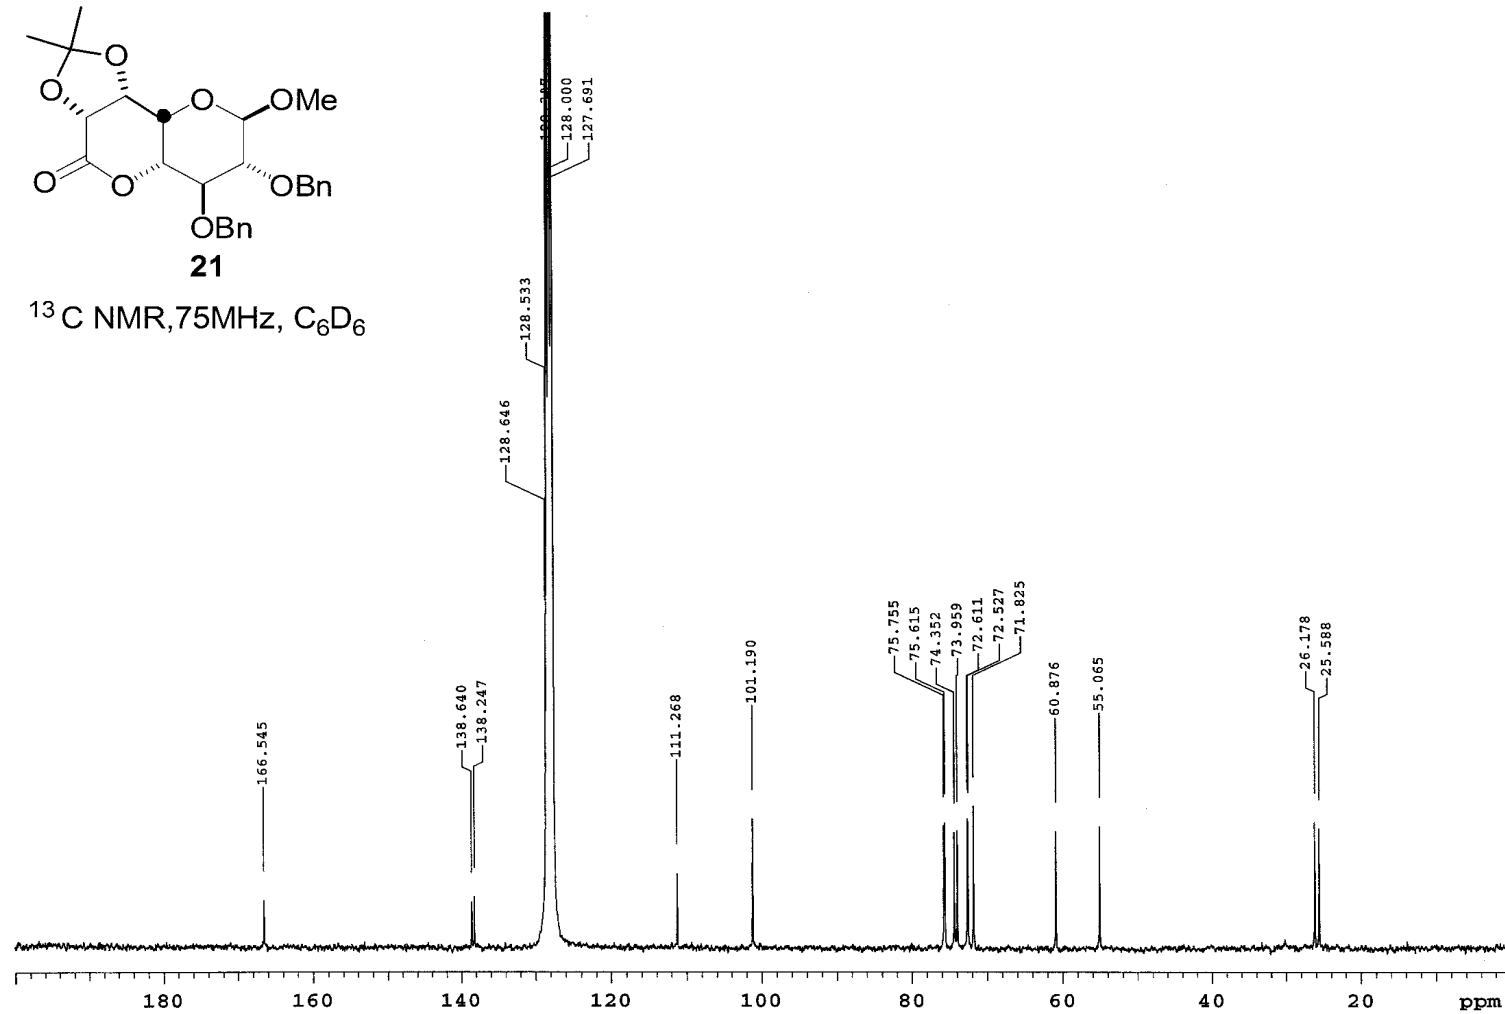

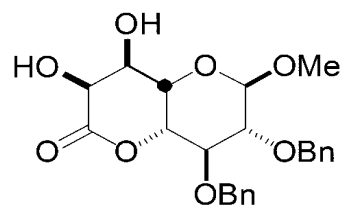

$^1\text{H}$  NMR, 300MHz,  $\text{CDCl}_3$

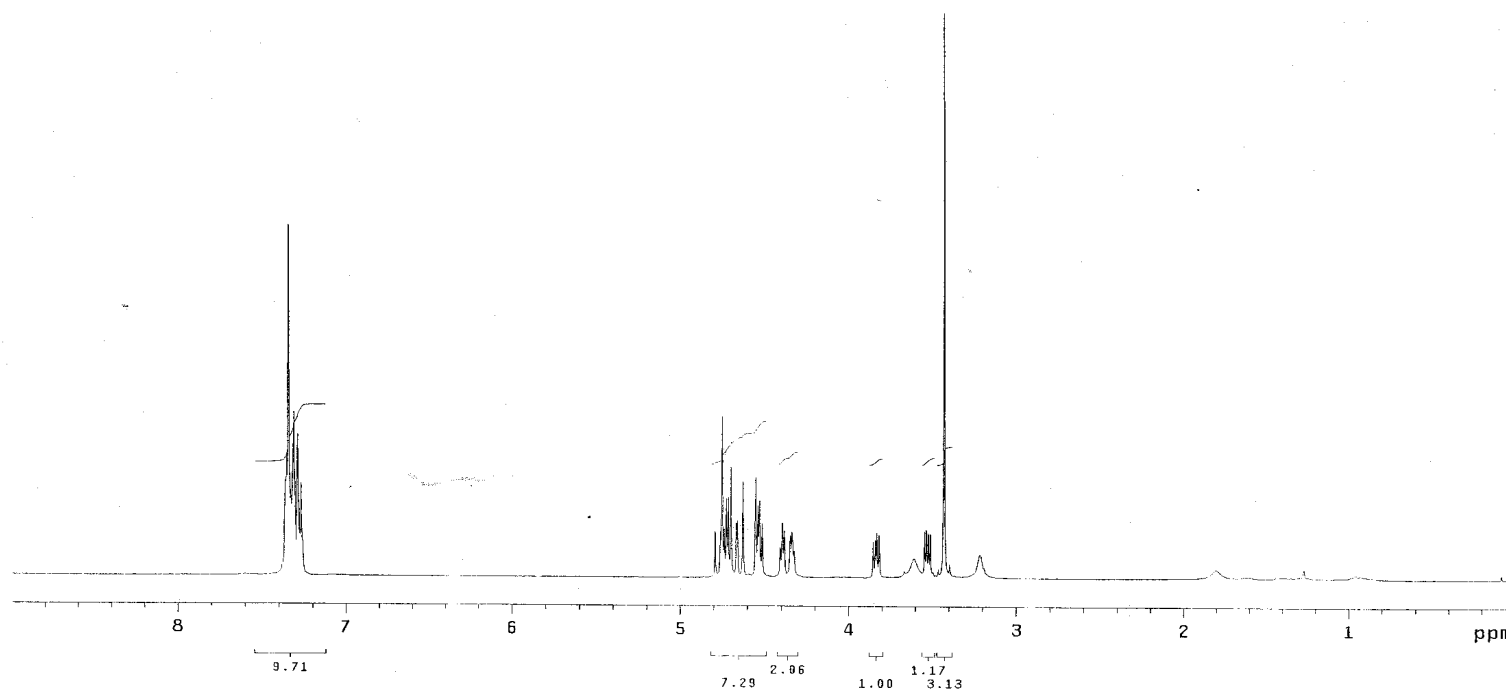

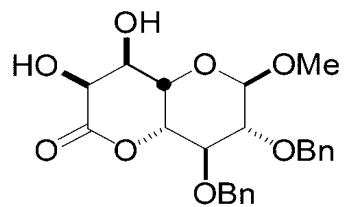

$^{13}\text{C}$  NMR, 75MHz,  $\text{CDCl}_3$

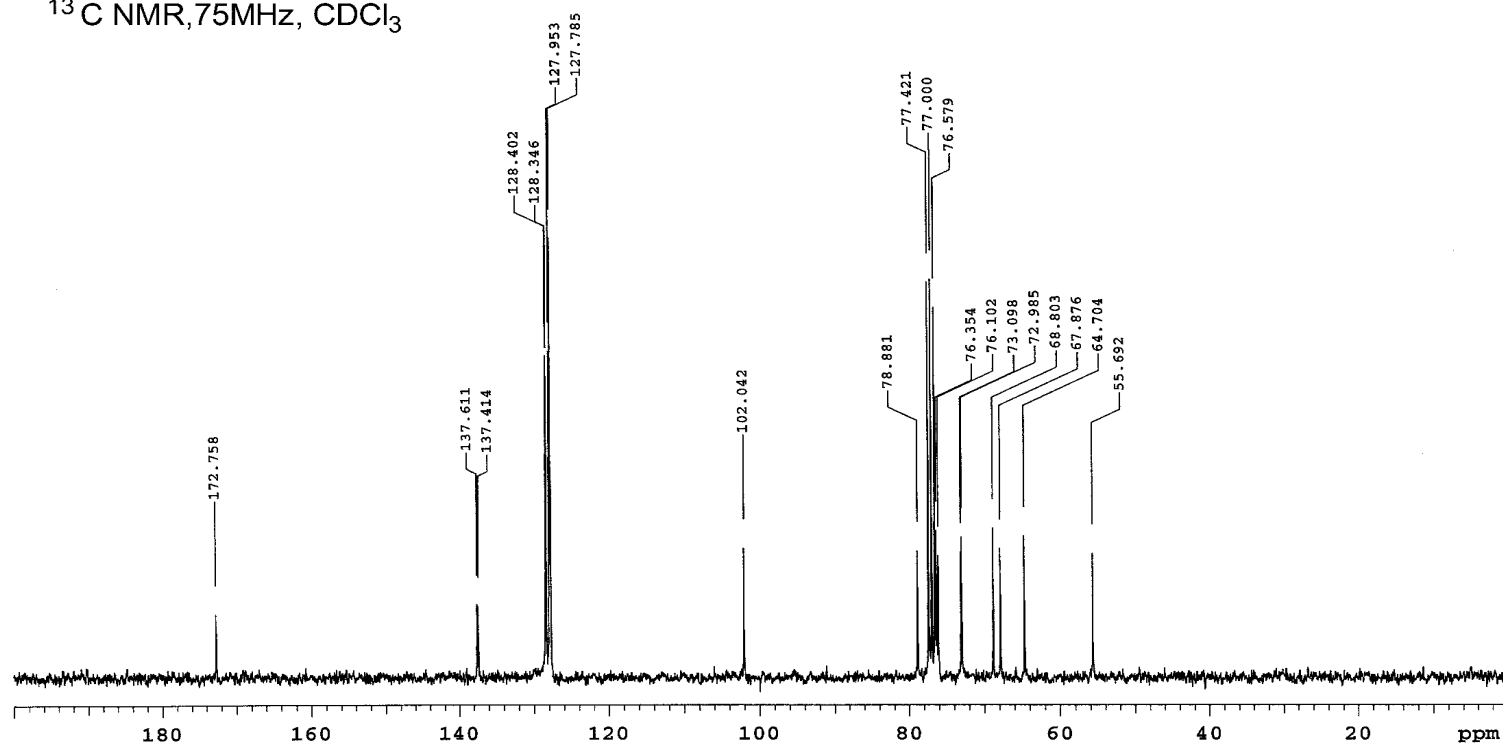

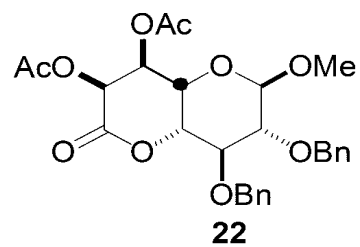

<sup>1</sup>H NMR, 300MHz, CDCl<sub>3</sub>

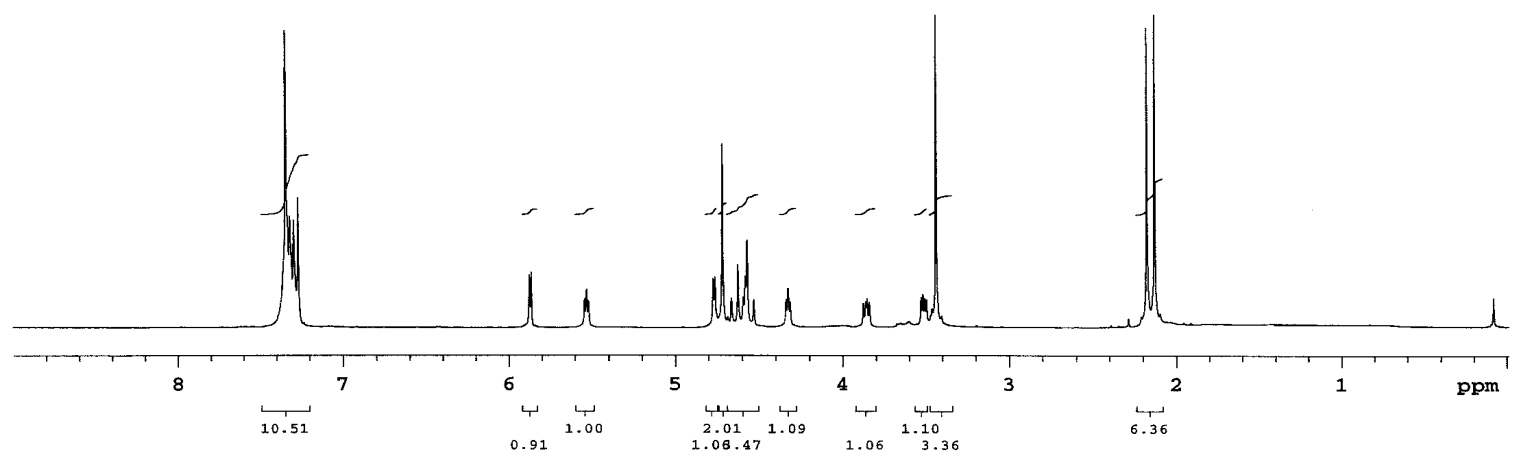



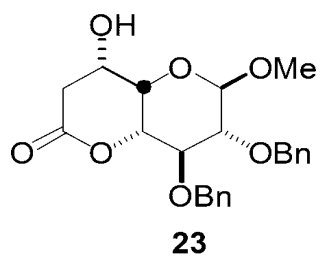

$^1\text{H}$  NMR, 300MHz,  $\text{C}_6\text{D}_6:\text{CD}_3\text{OD} = 5:1$

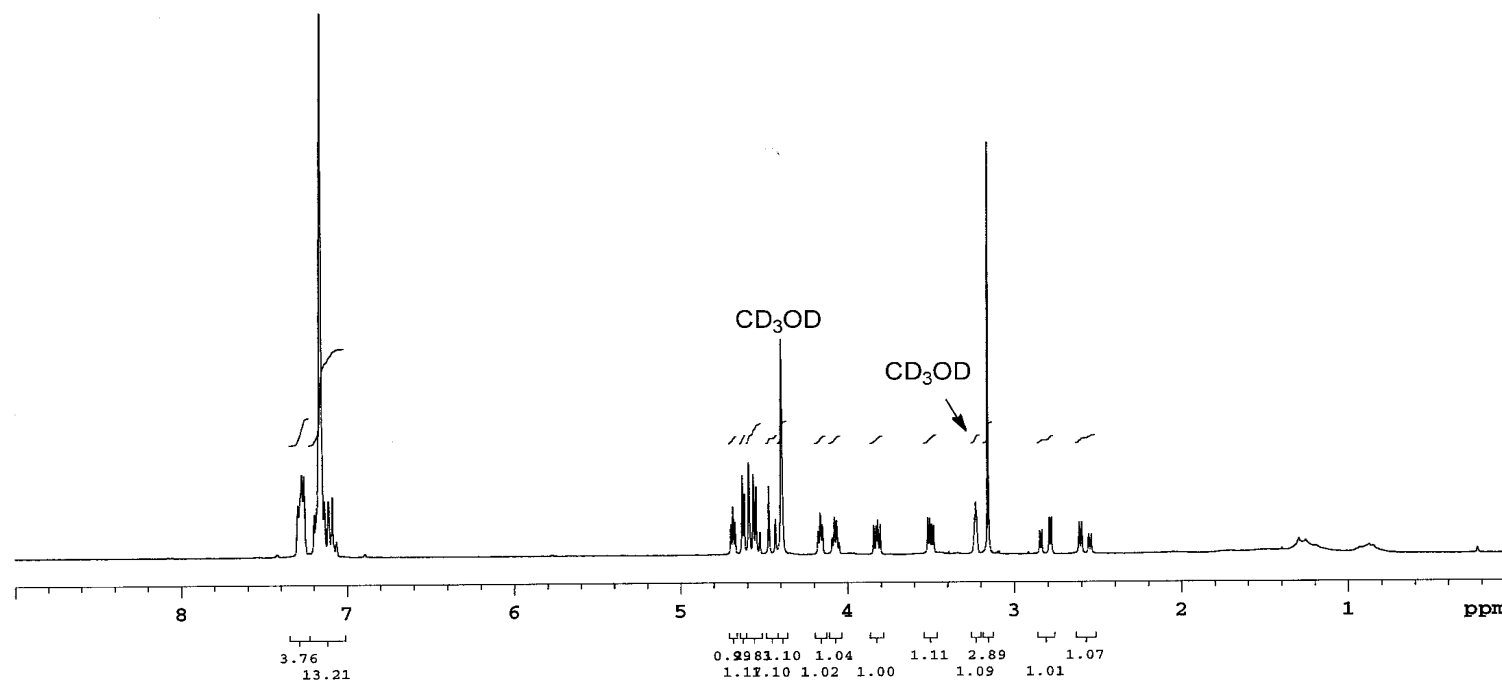

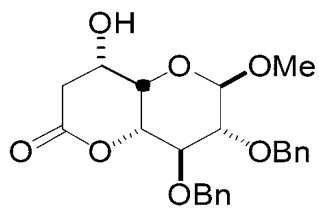

**23**

$^{13}\text{C}$  NMR, 75MHz,  $\text{C}_6\text{D}_6:\text{CD}_3\text{OD} = 5:1$

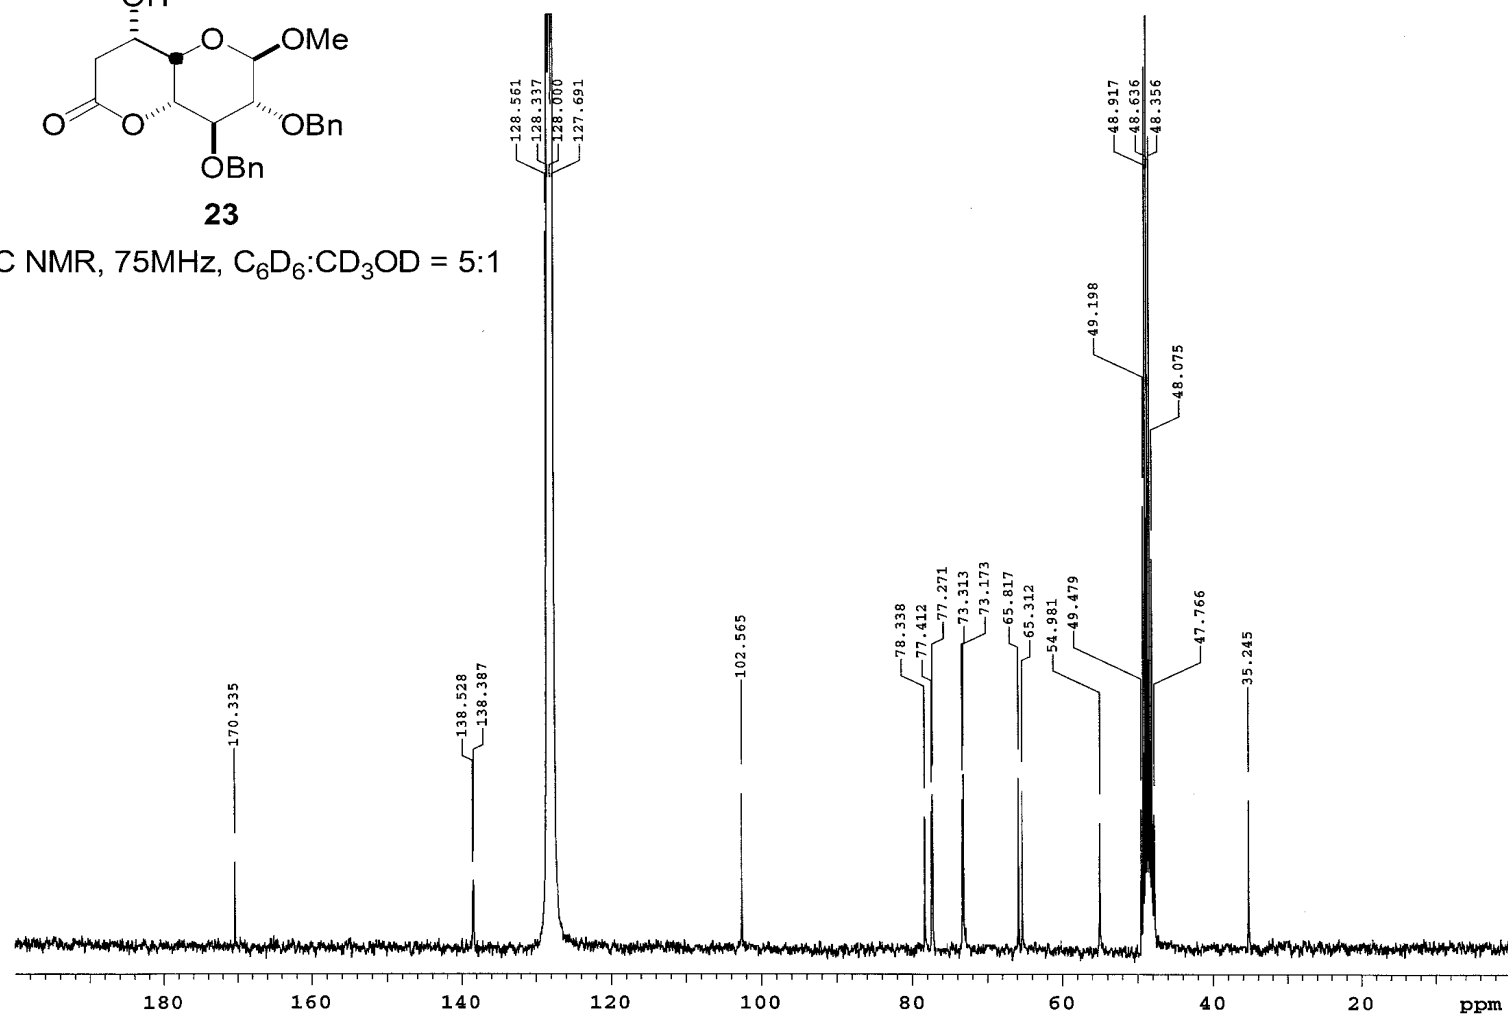

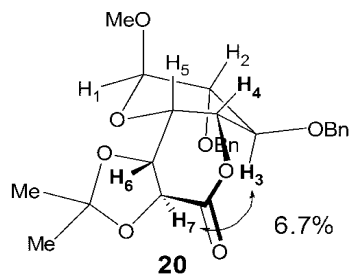

<sup>1</sup>H NMR H<sub>3</sub> NOE, 300MHz, C<sub>6</sub>D<sub>6</sub>

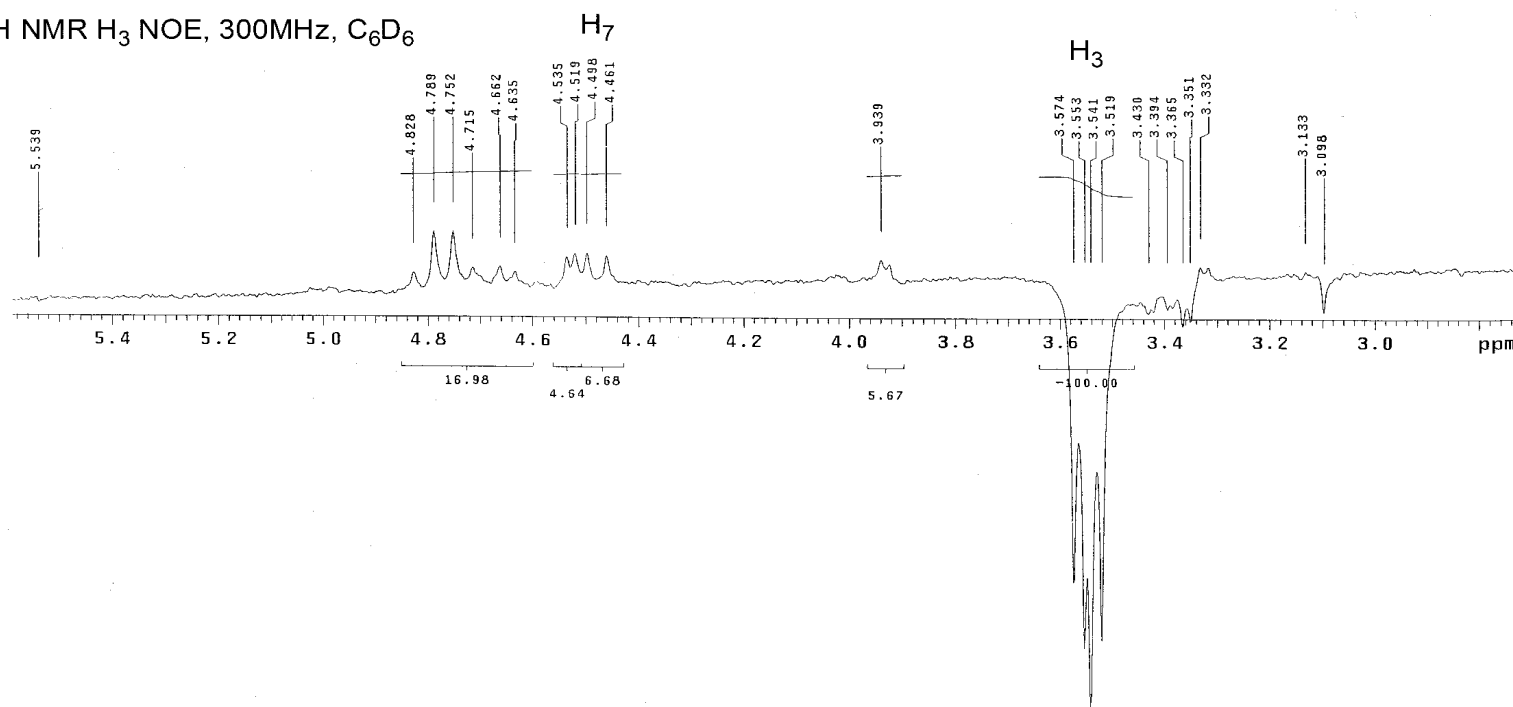

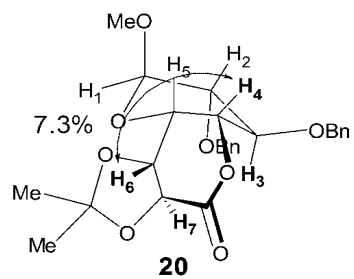

<sup>1</sup>H NMR H<sub>4</sub> NOE, 300MHz, C<sub>6</sub>D<sub>6</sub>

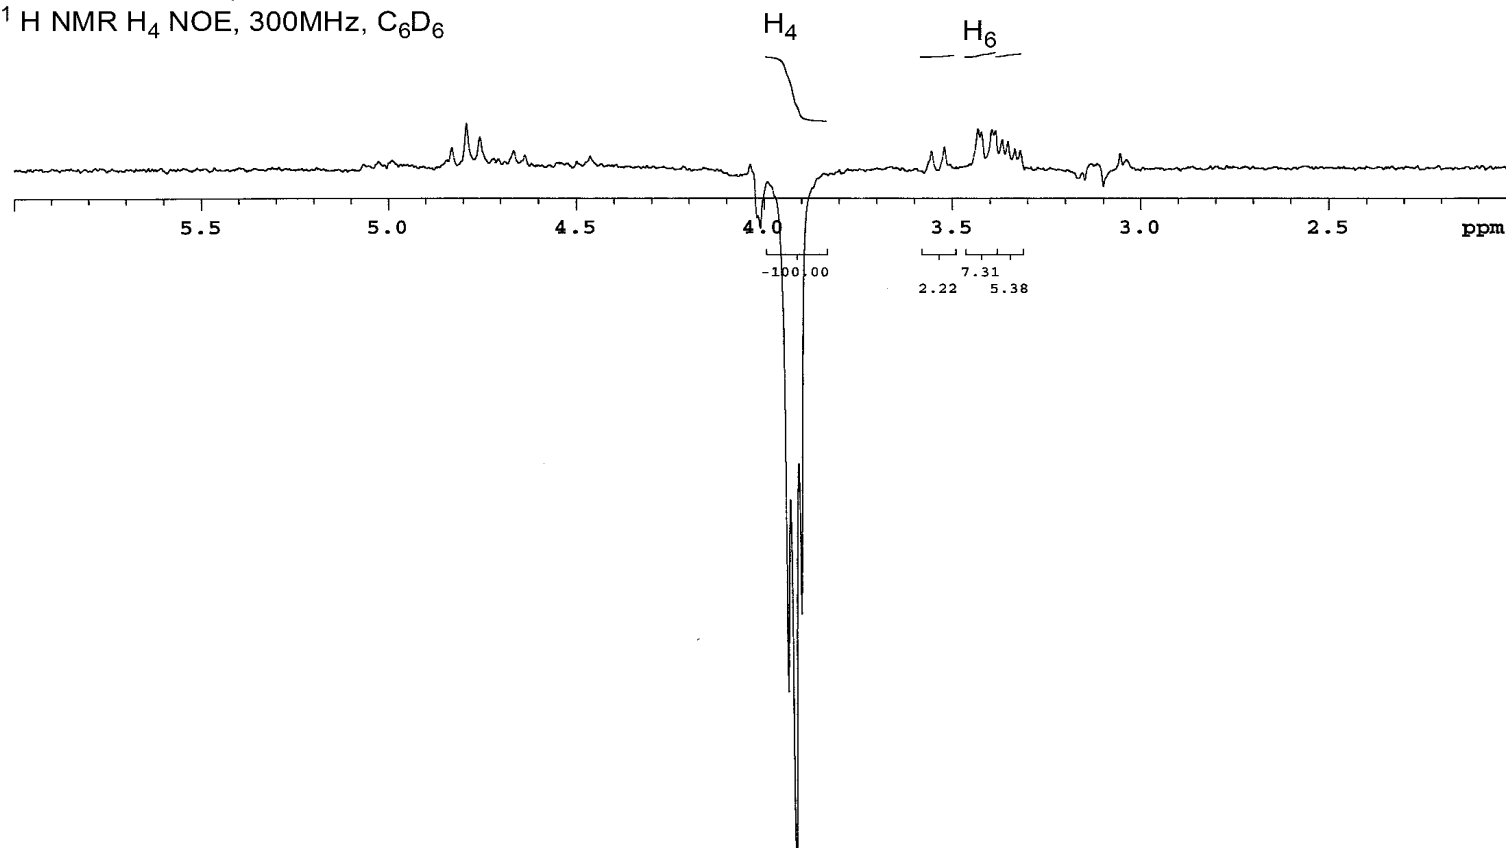

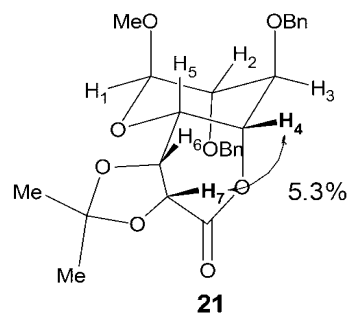

<sup>1</sup>H NMR H<sub>7</sub> NOE, 300MHz, C<sub>6</sub>D<sub>6</sub>

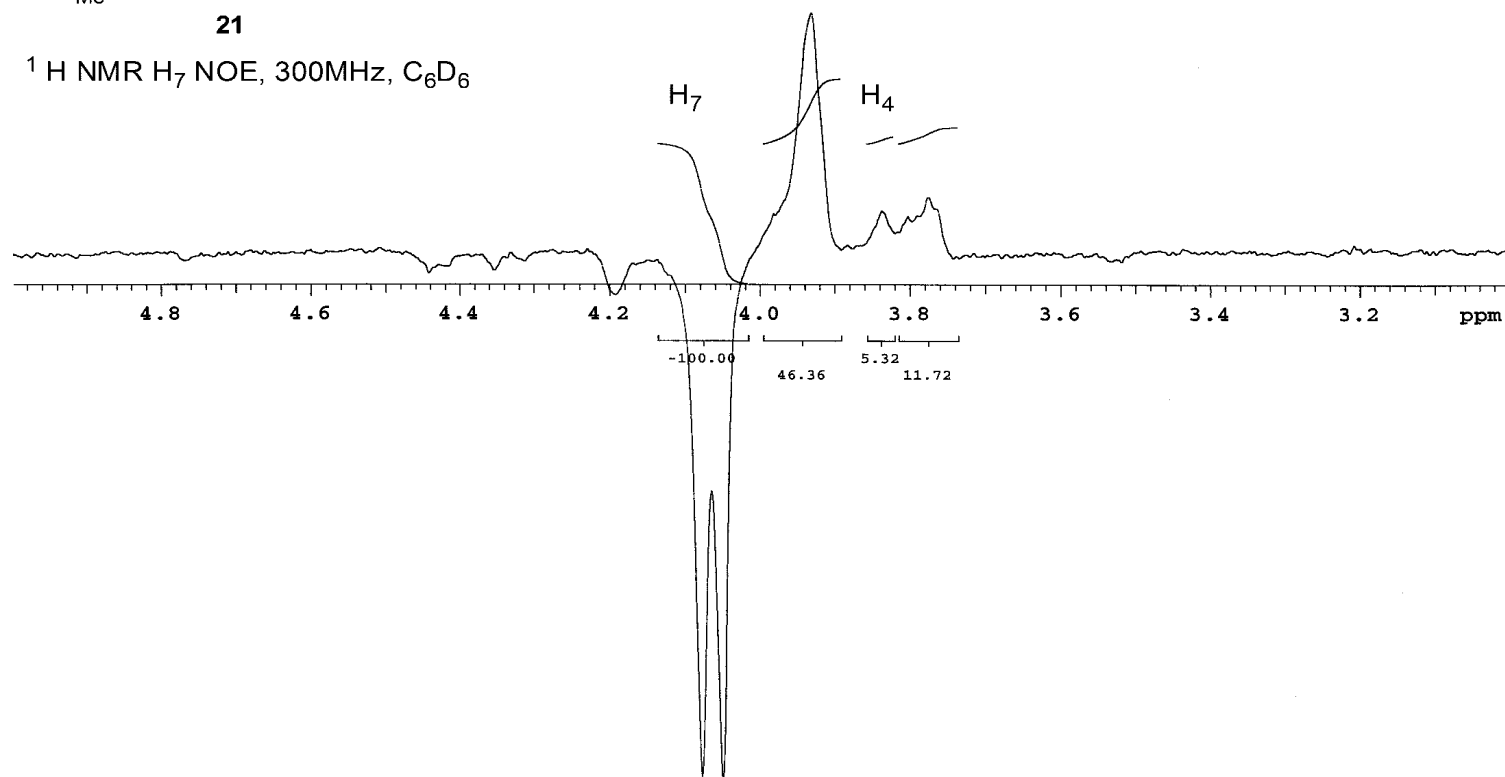

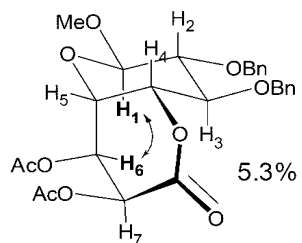

**22**

<sup>1</sup>H NMR H<sub>6</sub> NOE, 300MHz, C<sub>6</sub>D<sub>6</sub>

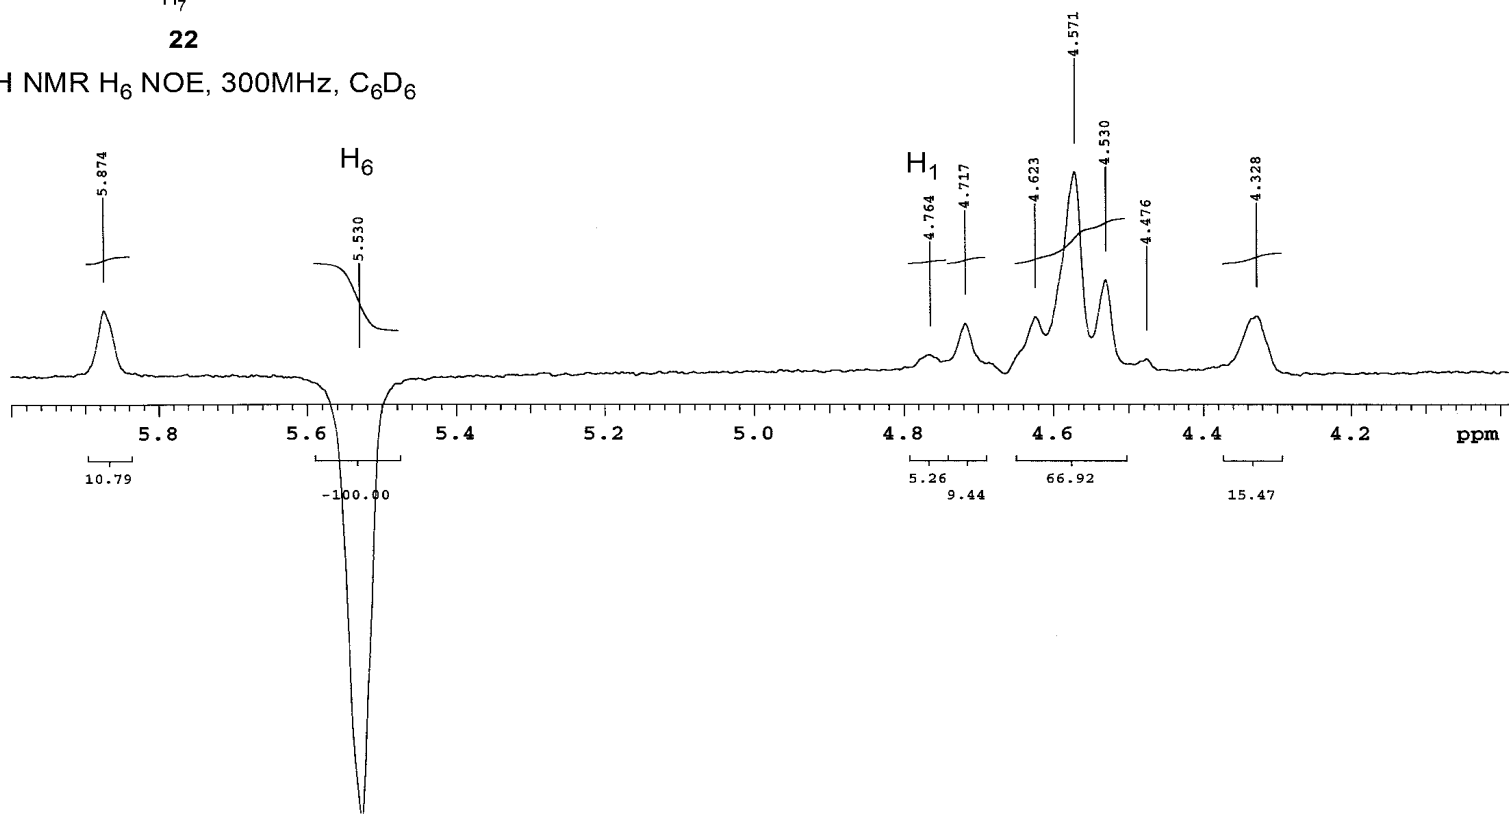

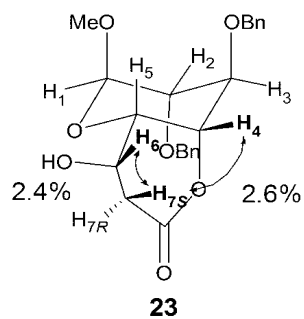

<sup>1</sup>H NMR, 300MHz, C<sub>6</sub>D<sub>6</sub>:CD<sub>3</sub>OD = 5:1

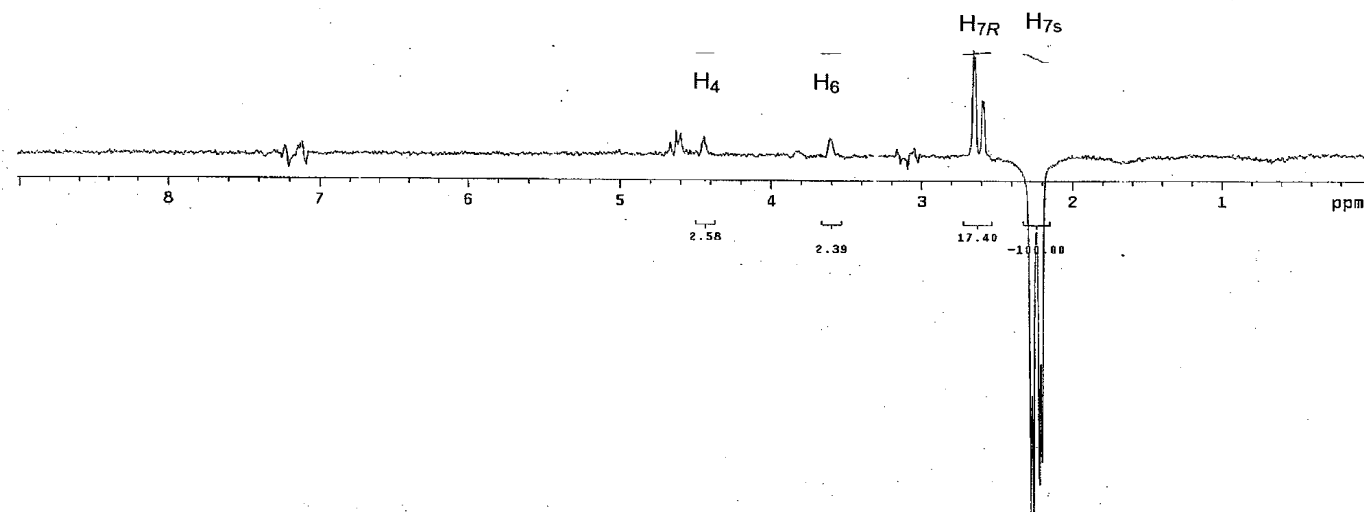

Supplement: Supplementary file 1 [file 4676809]
